# Supplementary material for: Evolutionary conservation and in vitro reconstitution of microsporidian iron–sulfur cluster biosynthesis
Source: PubMed Central journal article supplement (PMC5216125; doi:10.1038/ncomms13932), 2017-01-04
Supplement: ncomms13932-s1.pdf [file ncomms13932-s1.pdf]

**Supplementary Figure 1: Conservation of amino acid residues in microsporidian ISC and CIA proteins.**

Multi-sequence alignments are provided for **a)** the ferredoxin oxidoreductase Arh1, **b)** the ferredoxin Yah1, **c)** the monothiol glutaredoxin, **d)** the ABC transporter Atm1, **e)** the metal-binding P-loop NTPases Cfd1 and Nbp35, **f)** the CIA targeting complex protein Cia1, **g)** the CIA targeting complex protein Cia2, **h)** the iron-only hydrogenase-like CIA factor Nar1, and **i)** the electron transfer chain components Dre2 and **j)** Tah18.

## a. Ferredoxin oxidoreductase Arh1

Arh1\_Tra\_hom M-----KICII**GA**  
 Arh1\_Enc\_cun M-----KVCVI**GG**  
 Arh1\_Enc\_int M-----KVCVI**GG**  
 Arh1\_Nos\_cer M-----KVAII**GG**  
 Arh1\_Ent\_bie M-----KTVAII**GS**  
 Arh1\_Sac\_cer MSF-----VQIRHISSQINRKTVSIV**GS**  
 Arh1\_Neu\_cra MTFVARVKPGALGLRGRWPSQVHAPRRMYSQHPAHTSPEHPLRVAVI**GS**  
 Arh1\_Hom\_sap MASRC---WRWWGWSAWPRTLPPAGSTPSFCHHFSTQEKTQPQICVV**GS**  
 Arh1\_Cry\_par MRP-----YKPIYKLCIV**GA**

Arh1\_Tra\_hom **GP**STY**Y**LTNHIHT**A**P----STTIHV**F**EKNSSPLQ**S**LKLFHTKPT-MR--  
 Arh1\_Enc\_cun **GP**AGLYTAASLLA**N**-----IDVTLHEKEAEV**G**MYR-Y**S**LLPASK---  
 Arh1\_Enc\_int **GP**AGLYTAASLL**S**ED-----VNVTL**Y**EKEPEL**G**LYR-Y**S**LLPESR---  
 Arh1\_Nos\_cer **GP**SGFLAKYLS**K**HA-----NSIT**I**Y**E**KSGTF**G**MYN-Y**S**YNPKL----  
 Arh1\_Ent\_bie **GP**SGLLVANYLAN**Y**-----MKINI**Y**EASNKIL**G**HYN-Y**S**LNIKK----  
 Arh1\_Sac\_cer **GP**SGF**Y**TAYHLL**K**KSP---IPLNVT**I**W**E**KLPVP**F****G**LSR-Y**G**VAPDHPE**V**K  
 Arh1\_Neu\_cra **GP**AGF**Y**TTYKLM**A**IQ---GTKVDM**Y**ESLPVP**F****G**LVR-F**G**VAPDHPE**V**K  
 Arh1\_Hom\_sap **GP**AGF**Y**TAQHLL**K**HPQ----AHVD**I**Y**E**KQPVP**F****G**LVR-F**G**VAPDHPE**V**K  
 Arh1\_Cry\_par **GP**SGC**Y**LAKYLL**A**SKKENIAIKIDLLD**S**LDP**F****G**LLR-Y**G**IAPDRHDL**K**

Arh1\_Tra\_hom -----INNVL-----CNIK**V**HK-----WMFERLSA  
 Arh1\_Enc\_cun --MSPFAKLL---EH---KNFSLKLNSK**V**DL**G**-----KLKTMEK  
 Arh1\_Enc\_int --MSPFTKLL---EH-----KNFSLKLNSKIDL-----EKL**S**GMEK  
 Arh1\_Nos\_cer ---NIFKNIL---NT-----KNIDFKPNFEITES-----NFKTIEP  
 Arh1\_Ent\_bie ---SLFENIL---KN-----KNINLFLNTKIT-----DLTTI--  
 Arh1\_Sac\_cer NCEETFTTCAEEFSSPT**N**QKHKFSF---**V****G**-GITIGKEILLKELL----D  
 Arh1\_Neu\_cra NCQEK**F**E**E**VA---SS-----PDFRFIGN**V**SV**G**TKSDHPDGLTVPLASLFR  
 Arh1\_Hom\_sap NVINTFTQTA---HS-----GRCAFWGN**V**EVGRDV-----TVPELRE  
 Arh1\_Cry\_par KSISSIDNSL**F**KKYS-----DDIKFYGN**V**TL**G**YDV-----KLEELKR

Arh1\_Tra\_hom FYDGIVVAV**G**GRARR-**L**D-----GA---LN-KFAVYGEDVVRKGGGLE  
 Arh1\_Enc\_cun EFDAFVIAT**G**SDGPR**R**L**D**-----IPGG-----EHCVSSLDIAKSWTG--  
 Arh1\_Enc\_int EFDAFVIAT**G**PGGPR**K**L**A**-----IPGA-----DHCIGSLDIKSWAG--  
 Arh1\_Nos\_cer YYDKFVLA**I**GGVP**N**F-NE-----N-----SSYINALDI**I**KNK----  
 Arh1\_Ent\_bie NADAIILAT**G**GI**A**KS-IN-----G**T**KTALDI**I**KQYDH--  
 Arh1\_Sac\_cer NQDAVIL**S**Y**G**CTGDR**K**L**N**-----IPGE---LGTKGVFSSREFVNWYNGHP  
 Arh1\_Neu\_cra HYN**A**IIFAY**G**AAQDR**K**L**G**-----IPGE---DQLKGVYSAREFVGWYNGLP  
 Arh1\_Hom\_sap AYH**A**VVLS**S**Y**G**AEDH**R**A**L**E-----IPGE---E-LPGVCSARAFVGWYNGLP  
 Arh1\_Cry\_par KYDVVV**L**AV**G**GLQ**S**F-HTLPVKYMN**N**ELQ**N**K**I**IGGVFSSRDWVFY**N**SHP

Arh1\_Tra\_hom GRTG-----RSARLLESVLESKRMLGRGRRS**A**EAMGLEKKNKI  
 Arh1\_Enc\_cun -----  
 Arh1\_Enc\_int -----  
 Arh1\_Nos\_cer -----  
 Arh1\_Ent\_bie -----  
 Arh1\_Sac\_cer D**F**AK-----D**K**RF-----  
 Arh1\_Neu\_cra Q**H**-----**A****N**-----  
 Arh1\_Hom\_sap E**N**-----**Q****E**-----  
 Arh1\_Cry\_par M**F**KKML**Y**PTK**N**EH**S**NS**I**NN**K**LID**N**ERIDMD**I**EL**N**Y**L**KK**K**NN**Q**FF**E**Y**K**S**P**L

Arh1\_Tra\_hom TKNKNNEENENTRKD--VNSREMHESLVHAKPFSRLRRVAIV**GAGNVSLD**  
 Arh1\_Enc\_cun -----EELR-----YTVGRKVLVV**GMGDVSM**  
 Arh1\_Enc\_int -----EEPK-----YTVGSKVLIV**GMGDVSM**  
 Arh1\_Nos\_cer -----VSI-----NSLGKKVCI**I****GMGNVALD**  
 Arh1\_Ent\_bie -----NQD-----VNIGKNIC**I****I****GAGNVAMD**  
 Arh1\_Sac\_cer -----TDFD-----WSKVSKVGI**I****I****GNGNVALD**  
 Arh1\_Neu\_cra -----LNPD-----LTQGEAVVI**GQGNVALD**  
 Arh1\_Hom\_sap -----LEPD-----LS-CDTAVIL**GQGNVALD**  
 Arh1\_Cry\_par SSTEISVPFKN--ENEDFKYGYGSDILRNYILNSSERNAVI**I****I****GNGNVSLD**

Arh1\_Tra\_hom VANMLYE-----QGVPOIFILS  
 Arh1\_Enc\_cun IARFLFGWQ-----GPQFRFPKSILEKV-----KDVEDVTITS  
 Arh1\_Enc\_int ITKYLFGWA-----GPQFKFPKNALERV-----KEVRDVTITS  
 Arh1\_Nos\_cer VCRKII-----TKVNEIDIIS  
 Arh1\_Ent\_bie LLLRLK-----NKLSTATVIS  
 Arh1\_Sac\_cer ITRVLISNQIDEIWENTDISSLALNLLRR-----APVKDVKLIA  
 Arh1\_Neu\_cra VARMLLEDV--DVLKRTDIAAHALETLSQ-----SRVKRVHVVG  
 Arh1\_Hom\_sap VARILLTPP--EHLERTDITKAALGVLRQ-----SRVKTVWLVG  
 Arh1\_Cry\_par ITRLLSFYTHEQLSKNKYLNPDYLNLIIDTSSKYSNSDIYRPLFKNIFIIG

Arh1\_Tra\_hom **R**NELAKCAFGSY**E**LR**C**MRMHDKNVRVWGGTVGNDRRGMI-VGERLRKCEK-  
 Arh1\_Enc\_cun **R**RGVSGSAFTNSGL**R**SVLEIPDLGFHWSEGGNTPQNHRPRPENFEETS**N**-  
 Arh1\_Enc\_int **R**RVNLESSFSNHGL**R**SVLEIPRLGFSWSSPKDISCPDKDKTKDLEQKFT-  
 Arh1\_Nos\_cer **R**GGLYISKFGNNVM**R**EILNLANFKGH-----NISLPSNLKEN---  
 Arh1\_Ent\_bie **R**TDLFNSKFTNN**K**L**R**NIKDYQIT**T**NIYN-INDL----QPKNNEDI---  
 Arh1\_Sac\_cer **R**RFDFVHSKFT**N**KE**L**RELWELEKYGIRGRIDPKFFQK-----  
 Arh1\_Neu\_cra **R**RGPMQAAFT**I**KE**V**RE**L**MKLSNVSF---HPVDTSL-----  
 Arh1\_Hom\_sap **R**RGPLQVAFT**I**KE**L**REMIQLPGARPI-LDPVDFLG-----  
 Arh1\_Cry\_par **R**RGWIQNSFKYPL**L**KE**F**IDKSRKSKYNSTNGMNIRVMM-SQEDFELSQD-

Arh1\_Tra\_hom ---DS-----GDEEIIETE-NESS**R**NST**I**ENNKIANDTRCDDP  
 Arh1\_Enc\_cun ---WAREHR-----DSEENGRIKK---WWE**R**RM---G-----LLG-  
 Arh1\_Enc\_int ---YLQKDD-----GKKDNINK---WKE**R**RL---R-----LFQ-  
 Arh1\_Nos\_cer -----**R**RY---N-----LLN-  
 Arh1\_Ent\_bie -----**R**RL---H-----I**I**K-  
 Arh1\_Sac\_cer -----EMFDPSKYD**R**AF**N**RVEMCSEYLKPFNER  
 Arh1\_Neu\_cra -----LPPDLKSL**P**AP**R**LM**E**MLAKGTTAISQS  
 Arh1\_Hom\_sap -----LQDKI**K**EV**P**RP**R**K**R**L**T**ELL**L**RTATE-KPG  
 Arh1\_Cry\_par ---RT-----SLFELERSG-PE**I**K**R**FL**K**MKSIFQEMVNNHQEY

Arh1\_Tra\_hom FYTSP**T**LLSLFNLSYNPTETS**F**HNQ**S****P**SLQPKQ**T**LYLLLNTV**L**Q**S**IKKNV  
 Arh1\_Enc\_cun ---AVRKG-----ARRL**R**LMFNT**N**IK**S**IEKVGAQYKV  
 Arh1\_Enc\_int ---GVREG-----AK**R**LMFNT**N**IK**S**IERVGRQYKV  
 Arh1\_Nos\_cer ---NN**N**IKIDK-----TK**N**INLFFD**T**SIK**V**TKINGKYV  
 Arh1\_Ent\_bie ---K**I**NNNIN-----N**K**IS**F**IFNGTV**K**Q**I**ADNKV**T**Y---  
 Arh1\_Sac\_cer SKKNYK**K**AP**P**SSGYDK**F**WELDY**L**K**T**EL**K**INR**D**DFGAIN-----  
 Arh1\_Neu\_cra -PS-----ETAK**S**W**S**LD**F**CL**T**PK**A**F**S**SS**S**ST**P**-----  
 Arh1\_Hom\_sap -----PAEAARQASASRAWGL**R**FF**R**SE**P**Q**V**LPSPD**G**RR**A**-----  
 Arh1\_Cry\_par IANND**N**I**F**HNDKT**I**NI**H**FK**N**L**F**ST**V**NI**K**TE**V**NI**F**EN**N**V**K**K**K**-----

Arh1\_Tra\_hom SLFNLALK-----TR-E--GTKMLNNVDLVVNCTGYT  
 Arh1\_Enc\_cun KME-----QDGVQIEECFDSVSSIGFN  
 Arh1\_Enc\_int KME-----QGGIPIEEYFDTVISSVGFSS  
 Arh1\_Nos\_cer EFN-----N---GCEHKYDSIITSFGFK  
 Arh1\_Ent\_bie -----L-----S-N--GETVEKIFTDIISIGFI  
 Arh1\_Sac\_cer S-LSLCNNRLNE-----D-----NSLQPLKDVNNIMTYKVDLLITSLGYA  
 Arh1\_Neu\_cra TSTQLASTTFER--TTLSPSPFDPNAYA-LPTGETLTLPSIIAFRSIGYK  
 Arh1\_Hom\_sap AGVRLAVTRLEG--VD-----EATRA-VPTGDMEDLPCGLVLSIGYK  
 Arh1\_Cry\_par SIP--FIKGIELARNIRDSKPI-TDKTK-LNEKEKYLLPCQLLITSLGFK

Arh1\_Tra\_hom GRDL-----STYV-----CTKPLYF  
 Arh1\_Enc\_cun RTKE-----KAPG-----IAKAVYH  
 Arh1\_Enc\_int RADP-----RSLG-----FTKPVYY  
 Arh1\_Nos\_cer ANQL-----KIN-----TDKPVYK  
 Arh1\_Ent\_bie PNIN-----VN--T-----NTVNNVPVYK  
 Arh1\_Sac\_cer GVPMPFEFSKLSIGFDK--DHIANK-QGRVL-----TSSGEIFPHLYA  
 Arh1\_Neu\_cra STPLPEFSDINIPFDERRGIISNDGRGRVQHEERTRGAEMSHGSFPGLYC  
 Arh1\_Hom\_sap SRPV-----DPSVPFDSKLGVIIPNV-EG-----RVMDVPGLYC  
 Arh1\_Cry\_par PKYD-----YIFNGNKDY-----SFENNCFPCCIIFK

Arh1\_Tra\_hom LGWCKD-AKGNLSVVKGRAVELGDRMIDEMGL-----  
 Arh1\_Enc\_cun V~~GW~~ARH-PRGNVERAKEDAQDVVNKIVQTEKI-----  
 Arh1\_Enc\_int V~~GW~~AKH-PKGNAERAKEDAQDVVNKIVEMKK-----  
 Arh1\_Nos\_cer I~~GW~~CDI-PFGNISDAVQSAKMKVYKIL-----  
 Arh1\_Ent\_bie I~~GW~~CNK-PMGNIASLRINAQILADQIKTVLL-----  
 Arh1\_Sac\_cer S~~GW~~IRKGSQGVIASTMQDAFEVGD~~R~~VIQDLVVSGALSLENSIDLS-----  
 Arh1\_Neu\_cra A~~GW~~VKTGPTGVIASTMENAFATADAIIEDWVSRTPF~~L~~NADRNVHGWEGVK  
 Arh1\_Hom\_sap S~~GW~~VKRGPTGVIAATTMTDSFLTQMLLQDL--KAGLLPSGPR-PGYAAIQ  
 Arh1\_Cry\_par T~~GW~~METNSKGDNLNIALQKSLTLGNEILSLLKKMP-----

Arh1\_Tra\_hom -----  
 Arh1\_Enc\_cun -----  
 Arh1\_Enc\_int -----  
 Arh1\_Nos\_cer -----  
 Arh1\_Ent\_bie -----  
 Arh1\_Sac\_cer --NIK-----HTTWKDWERINKKELLRGKKEHKTRSKFLTFEELWNGVE  
 Arh1\_Neu\_cra SEVLKSGDDKRVVDWQGWRRIDEAERDRGRETGRSREKFTRTGEMLN--V  
 Arh1\_Hom\_sap ALLSS--RGV~~R~~PVSFSDWEKLDAAEVARGQGTGKPREKLVD~~P~~QEMLR--LL  
 Arh1\_Cry\_par -----PK-NV

Arh1\_Tra\_hom -K  
 Arh1\_Enc\_cun -Q  
 Arh1\_Enc\_int -M  
 Arh1\_Nos\_cer -T  
 Arh1\_Ent\_bie -K  
 Arh1\_Sac\_cer GI  
 Arh1\_Neu\_cra LG  
 Arh1\_Hom\_sap GH  
 Arh1\_Cry\_par EA

Abbreviations: Tra\_hom, *Trachipleistophora hominis*; Enc\_cun, *Encephalitozoon cuniculi*; Enc\_int, *Encephalitozoon intestinalis*; Nos\_cer, *Nosema ceranae*; Ent\_bie, *Enterocytozoon bieneusi*; Sac\_cer, *Saccharomyces cerevisiae*; Neu\_cra, *Neurospora crassa*; Hom\_sap, *Homo sapiens*; Cry\_par, *Crystosporidium parvum*.

Conserved residues situated close to the prosthetic group FAD are highlighted in yellow<sup>1,2</sup>. Conserved residues situated close to the cofactor NADP<sup>+</sup> are highlighted in red.

**In bold:** Consensus sequence of four highly conserved peptide segments in Arh1 homologues. All of these polypeptide motifs map to the active-site of Arh1 and make contacts with both FAD and NADP. Three of the motifs are involved in binding FAD: 1) [VI]-[VI]-G-X-G-P; 2) G-L-X-R-X-G-X-A- P-D-H-X(3)-[KR] note that this motif is not conserved in microsporidia; and 3) G-W-X(3)-G-X(2)-G. The last motif is involved in binding NAD: G-X-G-N-V-X(2)-D- X(2)-R<sup>3</sup>.

The Arh1-Yah1 complex displays a highly charged surface arising from interacting surfaces that are predominantly acidic (Yah1) or basic (Arh1). In green: basic residues from Arh1 involved in salt bridges with acidic residues of Yah1<sup>4</sup>.

**Dark green:** Basic Amino acids from Arh1 that share properties with those residues shown empirically to interact with Yah1. The Arg 239 and 243 from the human sequence (underlined) were experimentally shown to have binding affinity for Asp76 and Asp79 of ferredoxin<sup>5,6</sup>.

**b. [2Fe-2S] ferredoxin Yah1**

Yah1\_Tra\_hom M-LKNV-----  
 Yah1\_Enc\_cun MDMFSA-----  
 Yah1\_Enc\_int MDMANA-----  
 Yah1\_Sac\_cer MLKIVTRAGHTARI-----SNIAAHLRLTSPSLLTR-TT-----  
 Yah1\_Neu\_cra MSTPRVLRQSLQRLAQHARCYSKTTTAPLRTQPQRLPTAWS-----  
 Yah1\_Hom\_sap MAAAGGAR-----LLRAASAVLGG-PAGRWLHHAGS  
 Yah1\_Gia\_int MSLSS-----  
 Yah1\_Tri\_vag MLASIS-----  
 Yah1\_Cry\_par MVNLIWR----IS-----R-----PISSRVFSA

Yah1\_Tra\_hom -----KDE--KLINFIFLTK--TPKE  
 Yah1\_Enc\_cun -----PDRIPQIRIFFKTM-KQVVP  
 Yah1\_Enc\_int -----PDKTSGKVGLLFKTM-GKMIP  
 Yah1\_Sac\_cer -----TTTRFLPFSTSSFLNHGHLKPKPGEELKITFILKDGSKT  
 Yah1\_Neu\_cra TTTQLSASASARRSLSTSSALQHGVDPPKPGEEELYVTFIDKDNQTHR  
 Yah1\_Hom\_sap RAGSSGLLRNRGPGGSAEASRSLSVSARARSSSEDKITVHFINRDGETLT  
 Yah1\_Gia\_int -----IRR-----F-ITFRVVQQ-GVEHT  
 Yah1\_Tri\_vag -----RS-----AVKIHWTGK-GCDKI  
 Yah1\_Cry\_par IPYFSKRTLFLSFKRFFHSDPELW-----TKDVHPKIELSFILRDGEKKV

Yah1\_Tra\_hom VFSVPGKTLLEVAHANKIDLE--GACEGSLACSTCHVIL-DKKLYNSLEE  
 Yah1\_Enc\_cun AKAVCGSTVLDVAHKNVDLE--GACEGNLACSTCHVIL-EEPLYRKLGE  
 Yah1\_Enc\_int VNAVYGDVLETAHKNVDLE--GACEGNLACSTCHVIL-EEPLYRRLGE  
 Yah1\_Sac\_cer YEYCEGETILDIAQGHNDLE--GACGGSCACSTCHVIV-DPDDYDALPE  
 Yah1\_Neu\_cra LAVSEGDNLLDIAQAHNLEME--GACGGSCACSTCHVIVQDQDMYDRMPE  
 Yah1\_Hom\_sap TKGKVGDSLLDVVVENNLDIDGFGACEGTLACSTCHLIF-EDHIYEKLDA  
 Yah1\_Gia\_int VSGAVGQSLLDIAKAAHIPIQ--DACEGHLGGTQGVYL-DKKTYKRIPR  
 Yah1\_Tri\_vag VEGHNGETLLKIAERNKLPLP--NACEGNRACATQVYV-NKG-GDLLNE  
 Yah1\_Cry\_par FNAPKNISLLEAAQHEELDIE--GACEASLACSTCHVIL-DKEIYDELEP

Yah1\_Tra\_hom PSDREYDLEQAFMPCNTSRLGQVRVDERLRNSTIKLPRATRNMVAVDG-  
 Yah1\_Enc\_cun PSDKEYDLIDQAFGATGTSRLGQLRVDKSFENAVFTVPRATKNMAVDG-  
 Yah1\_Enc\_int PSDKEYDLIDQAFGITSTSRGQLKIDKSFECTVLTIPRATKNMAVDG-  
 Yah1\_Sac\_cer PEDDENMDLDLAYGLTETSRLGQIKMSKDIDGIRVALPQMTRNVNND-  
 Yah1\_Neu\_cra PDDDENMDLDLAFGLTETSRLGQVHMTKELDGLVVKLPSMTRNLQASD-  
 Yah1\_Hom\_sap ITDEENMDLDLAYGLTDRSRLGQICLTKSMDNMTVRVPETVADARQSI-  
 Yah1\_Gia\_int ATKEEAVLLDQVPNPKPTSRLSCAVKLSSMLEGATVRIPIPSFNKNVLSSESD  
 Yah1\_Tri\_vag ISDAEYDTLDYAVDLREQSRLACTCVLQTDGEMDVVPERCRNIDVSE-  
 Yah1\_Cry\_par PSEREEDMDLMAQVCETSRLACQIKVDERLTKGNIHLNPMTRNFYVDG-

Yah1\_Tra\_hom -----FKP--QPH  
 Yah1\_Enc\_cun -----FKP--KPH  
 Yah1\_Enc\_int -----FKP--KPH  
 Yah1\_Sac\_cer -----FS-----  
 Yah1\_Neu\_cra -----FKS-----  
 Yah1\_Hom\_sap -----DVG--KTS  
 Yah1\_Gia\_int ILASEEKRRHGQH  
 Yah1\_Tri\_vag -----FKKKKSIL  
 Yah1\_Cry\_par -----FKP--SPH

Abbreviations: Tra\_hom, *Trachipleistophora hominis*; Enc\_cun, *Encephalitozoon cuniculi*; Enc\_int, *Encephalitozoon intestinalis*; Sac\_cer, *Saccharomyces cerevisiae*; Neu\_cra, *Neurospora crassa*; Hom\_sap, *Homo sapiens*; Gia\_int, *Giardia intestinalis*; Tri\_vag, *Trichomonas vaginalis*; Cry\_par, *Cryptosporidium parvum*.

Residues involved in coordination of the [2Fe-2S] cluster are highlighted in red<sup>7,8</sup>. Acidic residues that interact with Arh1 are highlighted in green<sup>6</sup>. The glutamic acid residue (D to E change) in ThYah1 is highlighted in dark green. The replacement of D76 (underlined) with E in human Yah1 resulted in a strong increase in the Km value while replacement of D79 with E (as in the *T. hominis* sequence) exhibited only a slightly reduced binding affinity<sup>9</sup>. The two-conserved acidic regions are in **bold**. Ferredoxins containing a [2Fe-2S] cluster comprise two major groups: the plant and the vertebrate-type. They exhibit distinctive biochemical and structural properties. The vertebrate type is present in almost all living cells except Archaea. The amino acid residues that distinguish the vertebrate type from the plant type are highlighted in light blue.

### c. Monothiol glutaredoxin Grx

Grx3\_Tra\_hom MDRSPHELSAEEKKNEDELNNIFFKLQNYTNI IAHENDE-QEIDALL--K  
 Grx5\_Enc\_cun MALSQPL-----KMEVLDHNDAFEELKEYDVVVGYESES-NELCNML--R  
 Grx3\_Enc\_int M-----NGIEDSNPFEEELKEYEVVVAYDDEN-KKLSNVM--K  
 Grx3\_Nos\_cer MEYNK-----KKNTFADIDYDNIVLF-----YENEI--  
 Grx3\_Ent\_bie MDLKN-----ICDTNDFVLFYKENNTAFEN---LNTQI-KE  
 Grx5\_Sac\_cer MFLP-----KFNPIRSFSPILR-----AKTLL--R  
 Grx5\_Neu\_cra MLTR-----SLFSRQLFAAASRPAAIPKAVSSA---FRPVL--F  
 Grx5\_Hom\_sap M-----SGSLGRAAAALLRWGRGAGG-GGL---WPGPV--R  
 Grx5\_Gia\_int MDQINGGL----FPKALALTRYASRGLILGIISAAGAELENQLAGFLTRR  
 Grx3\_Cry\_par MSTTLNSF---VGITDFVLGNCLSAAILILSGKEEIDGSL-LELENVLQES

Grx3\_Tra\_hom YIDDDEYIIIVNLSISPVLKERFMKTYSVVEKLPILISYSTNI-----  
 Grx5\_Enc\_cun NAGVD-YVEVNLGESERLKAEFMKHFNVSKLPVLI IKGSPVS-----  
 Grx3\_Enc\_int DRGLD-YVEVNLAVSEKLRTEFMKHFVSELPVLLIEGIPAL-----  
 Grx3\_Nos\_cer PPGMEQNIRIINCSKQELRNAVVARYNLETLPALLFYKKVIY-----  
 Grx3\_Ent\_bie FDDVA-YVD--LSISKKLEELVSKTFNVNSFPLLI FKN TKI-----  
 Grx5\_Sac\_cer YQ-----  
 Grx5\_Neu\_cra YQ-----  
 Grx5\_Hom\_sap AA-----  
 Grx5\_Gia\_int YPRSL-FLPNAQ--NSVSRFLM-----PVCAPLATVS-----RG  
 Grx3\_Cry\_par FSNVK-FGKISE--SGVNEISAIKQFDVKELPSILLFTCQSLKPYKVIS-

Grx3\_Tra\_hom --YNDENVDAY--LKERKVNEDSFIDHKIDKMVGEKKVMVFIK GSPDKPE  
 Grx5\_Enc\_cun -GDPSDKIREY--AE----EREGDILRRIQSTVDPKRVTLFIK GSPENPK  
 Grx3\_Enc\_int -DDPSERIKEY--IE----RKEKKSLEKIQSVIDPNKITLFIK GSP EHPER  
 Grx3\_Nos\_cer --LKNDNIKNY--VE----DKQLLLEREVKRIINSCKIVLFIK GDLFDPY  
 Grx3\_Ent\_bie --TPKDTVENV--L-----YNYFVKFCKEFVCQSKYVFFMKGTIEKPY  
 Grx5\_Sac\_cer -----NR---MYLSTEIRKAIEDAIESAPVVLFMKGTPEFPK  
 Grx5\_Neu\_cra -----NR---FLSDATRQAIDKAVASAPVVLFMKGTPEPTPO  
 Grx5\_Hom\_sap -----GS---GAGGGGSAEQLDALVKKDKVVVFLKGTPEQPQ  
 Grx5\_Gia\_int LERTSDLNATLAQSESIKQELKMFILPQIRELLAENPVVLFMKGTPEPDSPE  
 Grx3\_Cry\_par GYNPSELHTNLEELIKIQNLSIPSQNEKFKILT NFKSLMVF MKG I K E E P Y

Grx3\_Tra\_hom CKFTKELISHFDELQLKNGKDYSYFNKLDNKT RNRLKKRNNWPTFPQIY  
 Grx5\_Enc\_cun CGFTKTLMDILYSAGVT-KDQIVYFDILSDEDVRRKLKEINSWPTFPQVY  
 Grx3\_Enc\_int CGFTKSLIEIILYGLGVT-RDKIEYLDVLSDEDI RERLKEINRWPTFPQVY  
 Grx3\_Nos\_cer CHFSKEVIQILKDNNVN-LDEIVYYNVLKKNKEMAEKI KEVNKWP TFPQLF  
 Grx3\_Ent\_bie CKYSKQLVELCNKKNI---IDIIAFDIFQDNIMREYLK KINNWP TYP MIF  
 Grx5\_Sac\_cer CGFSRATIGLLGNQGVDP-PAKFAAYNVLEDPELREGI KEFSEWPTIPQLY  
 Grx5\_Neu\_cra CGFSRASIQVLGLQGVD-PNKFAAFNVLEDAELRQGIKEYSDWPTIPQLY  
 Grx5\_Hom\_sap CGFSNAVVOILRLHGV---RDYAAAYNVLDDPELRQGIKDYSNWPTIPQVY  
 Grx5\_Gia\_int CGFSKFASMLLKYNNI----SFGVDVLD DPALRQGIKLYGNWPTIPQLY  
 Grx3\_Cry\_par CREAAGLVSLLLDSIKV---KNYGHYNI FENEETRQGLKEYHNWPTFPQIC



|              |                                                 |
|--------------|-------------------------------------------------|
| Grx3_Tra_hom | IDKLFVGGLDTFKKMKEKKIVQKMLFPGDQ-----EEIE         |
| Grx5_Enc_cun | IGGRFIGGLDVVRKMSEKGLRREIQ-----EII               |
| Grx3_Enc_int | IRGRFIGGLDIVRKMSEKGLKDELS-----GII               |
| Grx3_Nos_cer | VNGKLIGGCDILKKNLNETKELTKIL-----NKQ              |
| Grx3_Ent_bie | VDGQFIGGLDAFTDIIRC-----DKI                      |
| Grx5_Sac_cer | VNKEFIGGCDVITSMARSGELADLLEEAQALVPE-----EEEETKDR |
| Grx5_Neu_cra | IDKEFVGGCDIIVSMHQNGELAKLLEEKDVLVKGEEGAAEEQTEKKE |
| Grx5_Hom_sap | LNGEFVGGCDILLQMHQNGDLVEELKKLGIHSALL---DEKKDQDSK |
| Grx5_Gia_int | VKGELIGGSDIIQQQLHESGELRKVCG-----LPD             |
| Grx3_Cry_par | <u>INGEFI</u> GGLDILNEMHNSGELVNEIPK-----DAF     |

Abbreviations: Tra\_hom, *Trachipleistophora hominis*; Enc\_cun, *Encephalitozoon cuniculi*; Enc\_int, *Encephalitozoon intestinalis*; Nos\_cer, *Nosema ceranae*; Ent\_bie, *Enterocytozoon bieneusi*; Sac\_cer, *Saccharomyces cerevisiae*; Neu\_cra, *Neurospora crassa*; Hom\_sap, *Homo sapiens*; Gia\_int, *Giardia intestinalis*; Cry\_par, *Cryptosporidium parvum*.

Monothiol glutaredoxins bind a [2Fe-2S] cluster in a bridging fashion. The iron atoms are coordinated by the cysteine in the active site CGFS (in yellow) of the protein and a cysteine from bound glutathione. Monothiol glutaredoxins from bacteria and Grx3 and Grx4 from yeast form homodimers and it has been proposed that switching from dimeric to monomeric conformation releases the [2Fe-2S] cluster to acceptor proteins. In human, the holo-GLRX5 is tetrameric, whereas the metal free protein is also monomeric<sup>10-13</sup>. The amino acids involved in inter-subunit interaction in human Grx5 are shown in green. The amino acids in pink stabilize a loop in the tetrameric structure that shields the [2Fe-2S] cluster. In light blue and bold: essential residues for the biological activity of yeast Grx5<sup>14</sup>. The glutaredoxin domain (PF00462) is underlined in blue. The N-terminal thioredoxin-like domain (SSF52833) identified in *E. cuniculi* and *E. intestinalis* glutaredoxins using HHPred (<http://toolkit.tuebingen.mpg.de/hhpred>)<sup>15</sup> is highlighted in red. A CDD search<sup>16</sup> identified a thioredoxin-like domain (cd02984) in the protein from *C. parvum* (red). By contrast, no thioredoxin-like domain was identified in the corresponding segment of the *T. hominis* and *G. intestinalis* sequences.

#### d. ABC transporter Atm1

```

Atm1_Tra_hom1 MAS-----
Atm1_Tra_hom2 M-----
Atm1_Tra_hom3 MQGSNNAYRN-----
Atm1_Enc_cun1 MVICFRSPFK---QVNKYFR-----
Atm1_Enc_int1 MGG-----
Atm1_Nos_cer1 MKK-----
Atm1_Nos_cer2 MLE-----
Atm1_Nos_cer3 MKE-----
Atm1_Sac_cer MLLLPRCPVI-----GRIVR-SKFRSGLIRNHS-----
Atm1_Neu_cra MAPSIKLSTM-----ATSLHRAHGTSALLRRPR-----LWAPRLSSI
Atm1_Hom_sap MALLAMHSWRWAAA-AAAFE-KRRHSAILIRPLVSVSGSGPQWRPHQLGA
Atm1_Tri_vag MES-----
Atm1_Cry_par MWAFQTQKASN--L--K-ILK---PHPFVLNRST-----

Atm1_Tra_hom1 -----
Atm1_Tra_hom2 -----
Atm1_Tra_hom3 -----SSVYDRLCD
Atm1_Enc_cun1 -----
Atm1_Enc_int1 -----
Atm1_Nos_cer1 -----
Atm1_Nos_cer2 -----
Atm1_Nos_cer3 -----
Atm1_Sac_cer ---PVIFTV-SKL-STQRPLLFNSAVNLWNQAQKDITHKKSVEQFSSAPK
Atm1_Neu_cra HATPTIANLRASF-TTSSPRLFAPNGSAKDESK--PAVSTVPKTTGRGPS
Atm1_Hom_sap LGTARAYQIPESLKSITWQRLGKGNQFLDAA--KALQVWPLIEKRTCW
Atm1_Tri_vag -----
Atm1_Cry_par --KYGILYLGVFATSIRGKRAFFSSESNFAGNCMHAMTTSTFKNKDLAK

Atm1_Tra_hom1 -----I-----TTYEILQIIMTKYVK--DIPLIR-MTIMPTL
Atm1_Tra_hom2 -----NIHLYIFKRYVI--LNTPLA-LFMPPIL
Atm1_Tra_hom3 IACTYTDTIKKLCERSPHMSKPFQIFIFVVKEMF--SPPLKPCFVIIFTIV
Atm1_Enc_cun1 --KISASMGKKKV----SELQTLIIVRKYIL--SIPOVR-IIVFPVL
Atm1_Enc_int1 -----KKKV----SELQTLIIVRKYIL--GIPQAR-IIVFPVL
Atm1_Nos_cer1 -----I-----SNRKIIKEIIYNDLL--KIRMLR-YVIVPII
Atm1_Nos_cer2 -----KKSII--YGSDISIMKDLIVEYVI--SKPFIR-TFVIYII
Atm1_Nos_cer3 -----K-----TNYEILYDTFVKYCY--NISYIR-YVMFPIL
Atm1_Sac_cer VK-----TQVKKTSKAPTLSELKILKD-LFRYIWPKGNKVR-IRVLIAL
Atm1_Neu_cra DP--L--AAIDKTAQEQRKADWAIMKE-MSKYLWPKGSWGDK-ARVLLAI
Atm1_Hom_sap HGHAGGGLHTDPKEGLKDVDTRKI IKA-MLSYVWPKDRPDLR-ARVAISL
Atm1_Tri_vag -----DVTYI-----
Atm1_Cry_par EN---KLVNIIKKSRIQEKDSKNIEI-LTKYLWP-KNREYR-KRIIFSL

```

Atm1\_Tra\_hom1 FLMFVARIMEVKVSEIVQNASLEFS-----G-----YREGGT  
 Atm1\_Tra\_hom2 FCIIILSKYIKIYASSILKDIGQAIE-----D-----SHTVSRL  
 Atm1\_Tra\_hom3 AIIIFITELLLYKIRIENLRSLSSCK-----NYSTLRSFLF-YTTICGI  
 Atm1\_Enc\_cun1 LSIFAGKYFEVQVASCISHISDGLD-----S-----EGIPRGR  
 Atm1\_Enc\_int1 LSIFAGKYFEVQVASCISYISEGLD-----L-----EEVPRSR  
 Atm1\_Nos\_cer1 FLTIFYTVLEIKISTLVKLNQSI-----N-----RKGEHTA  
 Atm1\_Nos\_cer2 FGTFAVCTFNVLTVEATRKLTSDIT-----D-----NKDLSQS  
 Atm1\_Nos\_cer3 LSTIIACYLEVQASNISKRIAEDFE-----N-----KINAGKS  
 Atm1\_Sac\_cer GLLISAKILNVQV PFFFKQTIDSMNI-----AWDDPTVALF--AAIGLT  
 Atm1\_Neu\_cra GLLVGGKVLNVQV PFFYFREIVDSLNI-----DFSTTGSSVT--AVAGAM  
 Atm1\_Hom\_sap GFLGGAKAMNIVV PFMFKYAVDSL NQMSGNMLNLSDA PNTVA--TMATAV  
 Atm1\_Tri\_vag -----DRNSIGDSL N-----  
 Atm1\_Cry\_par LSLGVAKLATIQV PLLLSRLIDNVGA-----ISSNLSL SLTNKLNVLFL  
 TMD1

Atm1\_Tra\_hom1 FK--KYMIVGILSSLLIE-LQGFIFKSSVQRAYRTALKSS--LREYLLL-  
 Atm1\_Tra\_hom2 II--KLGACYLLYAFFNE-IYDFIAASPIQRAARHASNDF---LRNCLM-  
 Atm1\_Tra\_hom3 IYPTKFLVYQVIYSDYLERLSCRAFYTVLSRRWEITLQEEGLNSRFKNL-  
 Atm1\_Enc\_cun1 IA--MFLAVSLMGIMFTE-LQGFVFSAVQYVYRYTLRRT--FEYFIQM-  
 Atm1\_Enc\_int1 II--MFLVISLTGIIFTE-LQGFVFSAIQYVYRYTLRRT--FEYFIRM-  
 Atm1\_Nos\_cer1 LE--RFVLQSLLVAVLTE-LNGFIFTGVVQYIYRNTAKST--FKGFISL-  
 Atm1\_Nos\_cer2 LI--YFAVLTIVSITMSE-LNNEIFVTPVQHVFRLTGKNS--FKNFINM-  
 Atm1\_Nos\_cer3 IF--KYILFLTSSIVLRQ-INDIVFSGPIQFLYKIVGVEA--FYHYISL-  
 Atm1\_Sac\_cer II--CYGVARFGSVLFGELRN AVFAKVAQNAIRTVSLQT--FQHLMKL-  
 Atm1\_Neu\_cra II--GYGAARVGA VVSQELRN AVFASVAQKAIRKVARNT--FEHLLNL-  
 Atm1\_Hom\_sap LI--GYGVSRAQA AFFNE-VRN AVFGKVAQNSIRRIAKNV--FLHLHNL-  
 Atm1\_Tri\_vag -----LLNE-----DPAQISSVFN-----FSKY----  
 Atm1\_Cry\_par IS--SYGIARIS SSGFNE-LRN ALFSEVVSQYACKDLSLKA--FHHFHNV S  
 TMD2

Atm1\_Tra\_hom1 NWSEFKMKGMGEITASIERRSSAVSEILDVFIINLLPVFFVLFLAVLKIY  
 Atm1\_Tra\_hom2 ERVRLYECSSGVEGRTLVRASAVSDLEIDITLLEILPLLITFVLALTEMY  
 Atm1\_Tra\_hom3 GWLVESVTDNGIFQSFVHRGVKGMTNLI RQLVLSLLARIFSYFFVMKETN  
 Atm1\_Enc\_cun1 ETETFESYGS GTIQSIITRKS KAISDFEVS VQNLFPVVASLAFVGLEAY  
 Atm1\_Enc\_int1 ETEMFESYGS GTIQSIITRKS KAISDFEVS IQNLFPVVASLTFVGLEVY  
 Atm1\_Nos\_cer1 SPKNFSTIGGGEIQTIIDRKS KSASELIEVFLTSLLPICLKL FALIAVI  
 Atm1\_Nos\_cer2 ELSRYNKIGCGEIQTIIDRESKAISELIEVLFVNIINIFFTVILACSSIY  
 Atm1\_Nos\_cer3 NLENFNKIGSGEIQMIIERKS RAYGDILELTTLSAVPTCIVVIMSFFSVY  
 Atm1\_Sac\_cer DLGWHL SRQTGGLTRAMDRG TKGISQVLTAMVFHIIPISEFISVVCGLT  
 Atm1\_Neu\_cra DLSFHLSKQTGGLTRAI DRG TKGISFLLTSMVFHIVPTALEISMVCGILT  
 Atm1\_Hom\_sap DLGFHLSRQTGALS KAIDRGRG ISFVLSALVFNLLPIMFEVMLVSGVLY  
 Atm1\_Tri\_vag ----MQLRNIGQIIA-----FVFTGFTIS  
 Atm1\_Cry\_par NLSFIQSHRSGELLTIITRGFKSVSKLLNIMFQIIPPTAEFLMVLGILL  
 TMD3

Atm1\_Tra\_hom1 AIMGFTSSLIILISLITYTTVTIKMAVWRNEIRKKLNLSINESNNKLIDI  
 Atm1\_Tra\_hom2 RKFGYAAFMYNVMMLIVYIVITFAITRYRMRYRRRNNMYENRAHRSKCLEC  
 Atm1\_Tra\_hom3 DQLGTTILLAIIFMIVITLLTNI I I I Y I I I Y Y R R R Y N F L R A Q L D N H V S E C  
 Atm1\_Enc\_cun1 LRLGVLASLII I I I L A V G V Y G T M T I S I A L R R N R I R G A L N N A E N T A S N I V Y D T  
 Atm1\_Enc\_int1 LKLGVLASFIVALAVAAYGFMTISIALLRNRIRGALNSAENAASNIVYDT  
 Atm1\_Nos\_cer1 KNMGGLAGFIMEVFCVSCYATVTI I I A Q W R S N I R R E L N N S E N R S S N K L Q D G  
 Atm1\_Nos\_cer2 TNLGLTNMFIILITLLVYILATAKIVHWRTGIRKEYNCAQQRCSNHLHDS  
 Atm1\_Nos\_cer3 KNLGRDALYVMLATSALYVYFTFVFSIWRNNIRRQYNKSQDKLSNKLQDF  
 Atm1\_Sac\_cer YQFGASFAAITFSTMLLYSIFTIKTTAWRTHFRDANKADNKAASVALDS  
 Atm1\_Neu\_cra YNFGWQYAALTALTMVSYTAFTILTAWRTKFRQANAADNKASTIAVDS  
 Atm1\_Hom\_sap YKCGAQFALVTLGTLGTYAFTVAVTRWRTRFR I E M N K A D N D A G N A A I D S  
 Atm1\_Tri\_vag APLTLFAMFMSIFT--TYIFHKIR-DYAVNNIRAKFK-VNAAAMTVCLET  
 Atm1\_Cry\_par HKVGSEVALITLATMVAYMDFTRRITHKRTIYRKNMNTSEQKSNGLLSDS

TMD4

Atm1\_Tra\_hom1 LSNYESILAFNNQNLELYKYDNKLATSEKHVYKLVWRFTFYLLINFLQRVLC  
 Atm1\_Tra\_hom2 IRNVDTITVYKTVQFELNQYDDINKKVQFYSSRQYQSLALINLTQKVILY  
 Atm1\_Tra\_hom3 LSNHLLVTYCHKEMDEYQRYKMKVKNYRTAVVMLESVEHVLEILLYLIITN  
 Atm1\_Enc\_cun1 LSNHESVVSFNNDIETRRYDAKLMEIERFGTNLFRGLYIILNMLQKLIIFA  
 Atm1\_Enc\_int1 LSNHESVMSFNNDIETRRYDAKLMEIERFGTNLFRGLYIILNMLQKLIIFA  
 Atm1\_Nos\_cer1 LNNHETIVSFGTTDLEVDEYDQFLKINASNSNRLWRALYIILNLSQRAIFL  
 Atm1\_Nos\_cer2 LINHETILAYKTEEEESLKYEKYVSEVESECNRIWRSLSFLLYLVNKIIFA  
 Atm1\_Nos\_cer3 LANHETIKAYNMEETITYFDENQKPVEYFGVKSHRILFSLLYIQKMTFA  
 Atm1\_Sac\_cer LINFEAVKYFNNEKYLDKYNGLMNYRDSQIKVSQSLAFLNSGQNLIIFT  
 Atm1\_Neu\_cra LINYEAVKYFNNEAYEVGRYDKALAQYEKNSIKVATSLAFLNSGQNIIFS  
 Atm1\_Hom\_sap LLNYETVKYFNNEREYEAQRYDGFLLKTYETASLKSTSTLAMNFGQSAIFS  
 Atm1\_Tri\_vag ISNPRTVYFFDQEERSINKYTYIVDRVCQ-LERIFHGIFSIISFGGERTFN  
 Atm1\_Cry\_par LINAETLKYLNGEKYIYDLYSKYQEIYKNSNVKVQTSLAFINFGQNIIFT

Atm1\_Tra\_hom1 VQTC-MIIYVG----MCNKITSQFVLYLSISKILASNLDKLGYMYSRFT  
 Atm1\_Tra\_hom2 IFMV-TYLYR----VRESLGNQDQLLOYFSICSTIEELS NLGCIYHRFS  
 Atm1\_Tra\_hom3 ITKF-VVYVV--IYK-NNDVYPVHLVMFVMQKIDVIEQNTKWAGS FYEKLK  
 Atm1\_Enc\_cun1 FLNA-SVIALGAYGVLSSKMDGKMLIFVYVTSRILLMNINNLGFTYCRFT  
 Atm1\_Enc\_int1 FLNS-SMIALGVYGLSSKMDGRVLI FVYVTSRILLININNLGYTYCRFT  
 Atm1\_Nos\_cer1 LQSF-FIIYAGISGILSQNMSNQLIYLSITSTVTINLSNLGYLYTRYT  
 Atm1\_Nos\_cer2 LQCF-IVITLGNYGILTAKLSAR D V V F Y I G I N R T L Y S S F G Q L G F F Y S R Y T  
 Atm1\_Nos\_cer3 IQAI-I I I T L G S F G Y F P I K L S S Q Q L V F Y I S I S K T L T N S L S E M G M L Y T R Y V  
 Atm1\_Sac\_cer TALT-AMMYMGCTGVIGGNLIVGDLVLI NQLV F Q L S V P I N F L G S V Y R D L K  
 Atm1\_Neu\_cra SALT-VMMYMGAGVATGQ L T V G D L V L I N Q L V F Q L S V P I N F L G S V Y R E L R  
 Atm1\_Hom\_sap VGLT-AIMVLA SQGIVAGTLTVGDLVMVNGLLFQLSLPINFLGTVYRETR  
 Atm1\_Tri\_vag EGTFAVVLSFGGYLVISDRMSGGNLVAMLR I S S F S F L F G L L M G T A N N E A  
 Atm1\_Cry\_par GGLL-SAMLITNKVLAGTLP I G S I V L V T S L L F Q L A I P I N F I G M I Y R E S K

TMD5

TMD6

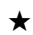

Atm1\_Tra\_hom1 AAILNAKMSF-LDTV-----LPKKLYPIR-----  
 Atm1\_Tra\_hom2 KAIVDLNTPFVRDMAETNQTYDRKPSVNLTEEPRTKRNTHVGNVAVDQYHA  
 Atm1\_Tra\_hom3 KAILDAEFAYDFVSSSKN-LKASHDSDLI IAGIGQSRDCTDHLGLSDSHS  
 Atm1\_Enc\_cun1 EAMLNAREVLSEDYDLK----TSARLSVA-----  
 Atm1\_Enc\_int1 EAMLNAREVLSEDYDLK----TNENISMV-----  
 Atm1\_Nos\_cer1 QAIINARSTYDTMLDIK---KENNKFKIT-----  
 Atm1\_Nos\_cer2 QAILNIRTSFKPELIKE----EPNLVDVN-----  
 Atm1\_Nos\_cer3 QGFLNAKSGYYEFKEDT----QTDKIRLI-----  
 Atm1\_Sac\_cer QSLIDMETLFLKLRKNEVK-IKNAERPLML-----  
 Atm1\_Neu\_cra QSLIDMETLFLNQLKVNVT-IKEQPNKPL-----  
 Atm1\_Hom\_sap QALIDMNTLFTLLKVDTO-IKDKVMASPL-----  
 Atm1\_Tri\_vag RSMEAANRVFNLENTQT-VDLKKGLEPE-----  
 Atm1\_Cry\_par LTLIDLSKLNELYLTIKPK-NSSNSQCRTI-----

Atm1\_Tra\_hom1 -----YF-----  
 Atm1\_Tra\_hom2 RGHEETNNDGRNSNNYAQKGKNICREENINTDQESKNDIQENGRAIPFIN  
 Atm1\_Tra\_hom3 DEGEQPAAKRYLETTVTLPKSKEIYYDENENVNTNTAPSR-----NTK  
 Atm1\_Enc\_cun1 -----RF-----  
 Atm1\_Enc\_int1 -----RF-----  
 Atm1\_Nos\_cer1 -----EF-----  
 Atm1\_Nos\_cer2 -----EF-----  
 Atm1\_Nos\_cer3 -----DF-----  
 Atm1\_Sac\_cer -----PEN-----  
 Atm1\_Neu\_cra -----TLT-----  
 Atm1\_Hom\_sap -----QIT-----P  
 Atm1\_Tri\_vag -----SL-----  
 Atm1\_Cry\_par -----QLNPKTKVLDFYKEMNL-----NGTGSSS

Atm1\_Tra\_hom1 -DKKIVFRNVALPLSSENILNTSNDVFTYAISDNYIFKNMSFEIKKGEKI  
 Atm1\_Tra\_hom2 TKPLLQFQNVTIKH-----KNTPIILTNLTFNVAQYAKV  
 Atm1\_Tra\_hom3 GTLIMQFRDFTIIM-----NQKLLFKPLNLSICKNDKI  
 Atm1\_Enc\_cun1 -RKNIVFNDVHSYY-----GDKKVLRGVNLTIEKGDKV  
 Atm1\_Enc\_int1 -GKNIVFKNVRLYY-----GDKKILNDVNLTIKKGDV  
 Atm1\_Nos\_cer1 -KESIKFNLSFGY-----ESRQIFNKINLEIYKGEKV  
 Atm1\_Nos\_cer2 -NNDIRLENASFNY-----YSKKILTDINILIKKGEKV  
 Atm1\_Nos\_cer3 -NEKLEFRNVSFSY-----LNKPILVNANFVINKGERV  
 Atm1\_Sac\_cer VPYDITFENVTFGY-----HPDRKILKNASFTIPAGWKT  
 Atm1\_Neu\_cra RGGEIEFKDVTFGY-----HPESPILRDLSLTIPAGKKV  
 Atm1\_Hom\_sap QTATVAFDNVHFY-----IEGQKVLSGISFEVPAGKKV  
 Atm1\_Tri\_vag -KGDIEFKNVWFKYP-----TRDQWVLKNVSFKINSGDIV  
 Atm1\_Cry\_par KKNSIKLENVSFGFPS-TFGNEHTYIETSNSSDDLVVNDLSLEIPLGKRM

Atm1\_Tra\_hom1 ALIGPNGIGKSNFLKMLLKF-NEYTGSIKIDDELCTIDNYSLRDLISYV  
 Atm1\_Tra\_hom2 AIVGPNAGAKSSIIKAILKL-TPYSGQI-----QKIENTR----LYT  
 Atm1\_Tra\_hom3 LIKGPNIGKSSIIIRAIIFGM-IDYIGDVTIKGVPLQNINTSKLCAMMAIC  
 Atm1\_Enc\_cun1 AIVGSSNGSGKSTILKTLKF-NSYQGSICIDGINIKAIENGSRRTIGYV  
 Atm1\_Enc\_int1 AIVGSSNGSGKSTILKTLRF-NRYQGSICIDGISIDAIENGSRRIIGYV  
 Atm1\_Nos\_cer1 AIIKNGSGKSTLLKLLKFDEEDYKGSILIDDIDIKKIKDEFYRNLLGYI  
 Atm1\_Nos\_cer2 AIIKNGSGKSTLIKIMRF-ENYGGNIYLDNRDIKEISNSSYRSLISFA  
 Atm1\_Nos\_cer3 AIIKNGTGKSTIIKLLMKF-YKYDGDILIDDTEIDNISDRSYRSLISYA  
 Atm1\_Sac\_cer AIVGSSGSGKSTILKLVFRFYDPESGRILINGRDIKEYDIDALRKVIGVV  
 Atm1\_Neu\_cra AIVGPSGCGKSTLLRLLFRFYDPQKGAIYIDGQDIRSVTLESLRRAIGVV  
 Atm1\_Hom\_sap AIVGSSGSGKSTIVRLLFRFYEPQKGSYLAGQNIQDVSLESLLRAVGVV  
 Atm1\_Tri\_vag AFVGHSGCGKSTIVQLLLRFYDVNSGEVLIDGRNIKEYSPSFIHRNIGVV  
 Atm1\_Cry\_par GFVGSSSGSGKSTLAKLTYRIFEPNSGKIRIFGKEIEDYEINEYRNCFAVL

Atm1\_Tra\_hom1 PQNSYLVSQTVKENIKYGNLVATDEEMIELCRSLNFHESFVRLSSGYETC  
 Atm1\_Tra\_hom2 SQEPQLFADTVLYNVAYGS-KAKLRCCI IAIAMKMGVHKDILMRM-GYGSLSL  
 Atm1\_Tra\_hom3 PQSPLVFKNTIRFNLGYGN-CATDEGMTKMCKHMNLFDKLVEMEDGLDSL  
 Atm1\_Enc\_cun1 PQNSSLFNETVMYNIKYGSPSVSDYAVVELAKRFNIHDSIMRLERGYFTN  
 Atm1\_Enc\_int1 PQNSSLFNETVMYNIKYGNPNVSDYTVVELAKRFNIHDSIMRLEKGYFTN  
 Atm1\_Nos\_cer1 PQNTFLFNESVKYNIKYGSFGISDEDIFALCKEFGLYDVFMMLENLGFDTN  
 Atm1\_Nos\_cer2 PQTSFLFNETVYYNLYTYGKEIFDKEEVIKISKKLCVHDSINNLEDEYNTH  
 Atm1\_Nos\_cer3 TQNTFLFDNTVTYNI FYGTKNVTEKEVLELAKKIGVLESIQEFKDGFSST  
 Atm1\_Sac\_cer PQDTPLFNDTIWENVKFRIDATDEEVITVVEKAQLAPLIKKLPQGFDTI  
 Atm1\_Neu\_cra PQDTPLFNDTVEHNIRYGNLSATPEQVIEAAKAAHIHEKII SWRDGYNTK  
 Atm1\_Hom\_sap PQDAVLFHNTIYYNLLYGNISASPEEVYAVAKLAGLHDAILRMPHGYPDQ  
 Atm1\_Tri\_vag QQDSALFTLSVRDNILYGKTDSTNEDVENAAKVAFAHNFI IKLPHQYDSM  
 Atm1\_Cry\_par PQEVLLLNMSI IDNLKIANNATLDEIKSACKLAGVHENILKMKNGYETI

Atm1\_Tra\_hom1 **I**GENNSVLSGG**E**KQKVAIARAML-----  
 Atm1\_Tra\_hom2 **L**TENARNLSGG**E**RQKITLLRNVVYGICACGDGVDCAHCEGCRDGSVQ**E**WS  
 Atm1\_Tra\_hom3 **I**LSGG**E**NFSGG**E**KKRLCVARAAL-----  
 Atm1\_Enc\_cun1 **V**G**E**CGRHISGG**E**RQKIVILRALL-----  
 Atm1\_Enc\_int1 **V**G**E**AGRHISGG**E**RQKIIILRALL-----  
 Atm1\_Nos\_cer1 **V**G**E**RGRLLSGG**E**KQKILLMRTML-----  
 Atm1\_Nos\_cer2 **V**G**D**KGHKLSGG**E**RQKVILLRSAL-----  
 Atm1\_Nos\_cer3 **V**G**E**RGRFLSGG**E**RQKIMLMRALL-----  
 Atm1\_Sac\_cer **V**G**E**RGLMISGG**E**KQRLAIARVLL-----  
 Atm1\_Neu\_cra **V**G**E**RGLMISGG**E**KQRLAVSRLIL-----  
 Atm1\_Hom\_sap **V**G**E**RGLKLSGG**E**KQRVAIARAIL-----  
 Atm1\_Tri\_vag **V**G**E**KGTTLSSG**G**QRQRIAIARAVL-----  
 Atm1\_Cry\_par **V**G**E**RGCSLSGG**E**KQRLGFARMLI-----

Atm1\_Tra\_hom1 -----  
 Atm1\_Tra\_hom2 DEEERNVKISVADRESITQFNDDHQAFNSDFVPYEVMTQDDTYQNATEDR  
 Atm1\_Tra\_hom3 -----  
 Atm1\_Enc\_cun1 -----  
 Atm1\_Enc\_int1 -----  
 Atm1\_Nos\_cer1 -----  
 Atm1\_Nos\_cer2 -----  
 Atm1\_Nos\_cer3 -----  
 Atm1\_Sac\_cer -----  
 Atm1\_Neu\_cra -----  
 Atm1\_Hom\_sap -----  
 Atm1\_Tri\_vag -----  
 Atm1\_Cry\_par -----

Atm1\_Tra\_hom1 -----KNAE--IYLFDEPTANLD-----  
 Atm1\_Tra\_hom2 GSTTNYNMMYDVDEISSKNEETFYPSAKNSPSILMLFDEATS**A**M**D**-----  
 Atm1\_Tra\_hom3 -----KRCE--IYWFDEPTAGLD-----  
 Atm1\_Enc\_cun1 -----KRSE--ILVMDEPTSNLD-----  
 Atm1\_Enc\_int1 -----RRPE--ILAMDEPTSNLD-----  
 Atm1\_Nos\_cer1 -----RNKE--IMALDEPTAALD-----  
 Atm1\_Nos\_cer2 -----KNSP--IIILDEPTAALD-----  
 Atm1\_Nos\_cer3 -----KNSE--IVLLDEPT**S**ALD-----  
 Atm1\_Sac\_cer -----KNAR--IMFFDEATSALD-----  
 Atm1\_Neu\_cra -----KDPP--LLFFDEATSALD-----  
 Atm1\_Hom\_sap -----KDPP--VILYDEATSSLD-----  
 Atm1\_Tri\_vag -----KNPS--LLITDEATAALD-----  
 Atm1\_Cry\_par -----KKSP--IWILDEPT**S**ALDLINHN

Atm1\_Tra\_hom1 -----KKSEETF  
 Atm1\_Tra\_hom2 -----KSSEYDV  
 Atm1\_Tra\_hom3 -----STNMHAV  
 Atm1\_Enc\_cun1 -----KEAEIDI  
 Atm1\_Enc\_int1 -----KEAEIDI  
 Atm1\_Nos\_cer1 -----KESEKKI  
 Atm1\_Nos\_cer2 -----KKAHEYEI  
 Atm1\_Nos\_cer3 -----KKSELET  
 Atm1\_Sac\_cer -----THTEQAL  
 Atm1\_Neu\_cra -----THTEQAL  
 Atm1\_Hom\_sap -----SITEETI  
 Atm1\_Tri\_vag -----SVSEKKV  
 Atm1\_Cry\_par FMVKMLSFLHEYSLSSTNSVNLNDKYDLGSKYKDI**F**SLIPYVKDKKEIQS

```

Atm1_Tra_hom1    FKRLAEDT-----QNKTIVIVILHNLELLDYFDRIMFLQKDRIQEIKRE
Atm1_Tra_hom2    IERLFDVC-----SECTVLMVIHNLTILHLFDTI IYVDKE--LEIGSF
Atm1_Tra_hom3    VDFITR-----MKGTVIAIMHTDEYDRCFDQVIYLERM-----
Atm1_Enc_cun1    IRNIIDSE-----GSVTVIAIVHNLDLLPFFNKVCFVDKGSAKMISQT
Atm1_Enc_int1    IKNIIDFE-----SSVTVMAIVHNLDLLPLFNKVCFVDRGSVRMIDQT
Atm1_Nos_cer1    LEIILQQ-----EDRTVLMIIHNLELINKFDKIIYIDENNIEVYKND
Atm1_Nos_cer2    LKSLISNN-----LEKTI IIVLHNLDLLHLFDKVL SIKNKT VSL----
Atm1_Nos_cer3    MTYIFNEF-----KYHTFV IIVHNLELLALFDKILFVNGNEVTMIEDI
Atm1_Sac_cer     LRTIRDNF-----TSGSRTSVYIAHRLRTIADADKIIIVLDNGRVREEGKH
Atm1_Neu_cra     MENINAILKGLGQKGEKKTSLFVAHRLRTIYSDLI IIVLKEGRVAEQGTH
Atm1_Hom_sap     LGAMKDVV-----KHRTSIFIAHRLSTVVDAD EIIIVLDQ GKVAERGTH
Atm1_Tri_vag     EKALRSVM-----SSRTSIIIAHRLGTIRCASHIFVLD DGEVVEEGSH
Atm1_Cry_par     IKKLIDDIV-----KLPLTI IIVIAHRLSSVRNF DLIAYLEEGNVKEVGNH

Atm1_Tra_hom1    EALKLMNSTKNEKSTKNAQEM-----
Atm1_Tra_hom2    ---DRLMQKKG-NFYLFYERM-----
Atm1_Tra_hom3    -----
Atm1_Enc_cun1    NGAARSIAERL-RDC-----
Atm1_Enc_int1    GTSSESAAEGL-RSY-----
Atm1_Nos_cer1    IEGQKKFSTNL-QYFLS-----
Atm1_Nos_cer2    ----HKIEENI-----
Atm1_Nos_cer3    ---NKKLEENSKYFA-----
Atm1_Sac_cer     ---LELLAMPGSLYRELWTIQEDLD-----HL
Atm1_Neu_cra     ---RELMERNG-VYAQLWRAQEMLMTEEGEVS-----KKGE
Atm1_Hom_sap     ---HGLLANPHSIYSEMWHQTSSRVQNHDPKWEAKKENISKEEERK-KL
Atm1_Tri_vag     ---DELISR RG-VYYELVKI-----
Atm1_Cry_par     ---DQLIENKM-QYYQLW NKQ-----

Atm1_Tra_hom1    ---CDT-----SEEQ
Atm1_Tra_hom2    ----RK-----ERRD
Atm1_Tra_hom3    -----
Atm1_Enc_cun1    ----GM-----LGVK
Atm1_Enc_int1    ----EI-----PGVK
Atm1_Nos_cer1    -----Y-----KLGK
Atm1_Nos_cer2    ----IS-----TLNL
Atm1_Nos_cer3    ----DI-----LNNE
Atm1_Sac_cer     ENELKD-----QQEL
Atm1_Neu_cra     KEEVGE-----KKEA
Atm1_Hom_sap     QEEIVNSVKGCGNCSC
Atm1_Tri_vag     -----QLDA
Atm1_Cry_par     ---HID-----SILK

```

Abbreviations: Tra\_hom, *Trachipleistophora hominis*; Enc\_cun, *Encephalitozoon cuniculi*; Enc\_int, *Encephalitozoon intestinalis*; Nos\_cer, *Nosema ceranae*; Sac\_cer, *Saccharomyces cerevisiae*; Neu\_cra, *Neurospora crassa*; Hom\_sap, *Homo sapiens*; Tri\_vag, *Trichomonas vaginalis*; Cry\_par, *Cryptosporidium parvum*.

Atm1 proteins are half size transporters that belong to subfamily B of the ABC transporter family<sup>17,18</sup>. The structure of these proteins includes an N-terminal domain with six transmembrane domains (TMD1-6) followed by a nucleotide-binding fold (NBF). The predicted TMD are labelled in brown. These were predicted with the TOPCONS web server: <http://topcons.cbr.su.se><sup>19</sup>.

The motif for the ATP binding box A (Walker A motif; G-X-X-G-X-G-K-S/T-X-X-X-X-X-I/V) is labelled in **red**. Note that in some cases the I/V residue is replaced by another hydrophobic amino acid. The mutation K475M within this motif resulted in the complete loss of *Saccharomyces cerevisiae* Atm1 function<sup>20</sup>. The conserved basic amino acid that precedes the Walker A motif is labelled in **blue**. The ATP binding box B (Walker B motif;  $\Phi$ - $\Phi$ - $\Phi$ - $\Phi$ -D, where  $\Phi$  represents hydrophobic residue) is labelled in **pink**. The Q-loop of the conserved ATP-binding motif is labelled in **green**. The conserved glutamate that acts as a catalytic base is labelled in **dark green**<sup>21</sup>.

The ABC signature motif (LSGG), also called the C-loop, which is present in the nucleotide-binding fold, is labelled in **grey**<sup>22</sup>. The D-loop (SALD), which interacts with the Walker A motif is labelled in **teal**<sup>23</sup>. The conserved histidine that is proposed to be involved in the catalytic reaction is labelled in **light grey**<sup>24</sup>. The residues identified in *Saccharomyces cerevisiae* that interact with glutathione are labelled in **yellow**. The star (★) corresponds to the human Atm1 E433K mutation found in patients with X-linked sideroblastic anemia and cerebellar ataxia (XLSA/A)<sup>25</sup>.



**e. P-loop NTPase Cfd1 and Nbp35**

```

Cfd1_Tra_hom      M-----
Cfd1_Enc_cun      M-----
Cfd1_Enc_int      M-----
Cfd1_Nos_cer      M-----
Cfd1_Ent_bie      MP-----
Cfd1_Sac_cer      MEE-----
Cfd1_Neu_cra      MS-----
Cfd1_Hom_sap      MEA-----
Cfd1_Tri_vag      M-----
Cfd1_Ent_his      MTE-----
Nbp35_Tra_hom     MSK-----CPGIH
Nbp35_Enc_cun     MGES-----CPGVS
Nbp35_Enc_int     MGES-----CPGVS
Nbp35_Nos_cer     MQNN-----YKCP
Nbp35_Ent_bie     MNN-----CSNVD
Nbp35_Sac_cer     MTEIL----PHVNDEVL-----PAEYELNQPEPEHC PGPE
Nbp35_Neu_cra     MAPSLEAEPESVASVLAN-----PQKPQLVAPEPEHC PGPE
Nbp35_Hom_sap     MEEV-----PHDCPGAD
Nbp35_Tri_vag     MS[S]-----
Nbp35_Gia_int     MDCIAYPPRSHRENKMPCCGNSGNGPCACHSGANGVESDLPKSGNKPVSD
Nbp35_Ent_his     C-----
Nbp35_Cry_par     IQI-----GNC[V]GVD

Cfd1_Tra_hom      -----
Cfd1_Enc_cun      -----
Cfd1_Enc_int      -----
Cfd1_Nos_cer      -----ERI
Cfd1_Ent_bie      -----KKNE
Cfd1_Sac_cer      -----QEIGVPAASLAGI
Cfd1_Neu_cra      -----LAKV
Cfd1_Hom_sap      -----AAEPGNLAGV
Cfd1_Tri_vag      -----ST
Cfd1_Ent_his      -----LNSDRNFVGVVDHV
Nbp35_Tra_hom     SE-----RAGQAEACAS[CPNSTY]CQQTN---SSTITKSRIARNTAG
Nbp35_Enc_cun     SK-----DAGKAE[CKG]CPNVGYCSQPVQ---QDPDIKAIQENLSGV
Nbp35_Enc_int     SK-----DAGKAE[CKG]CPNASYCSQPAQ---PDPDIKIIQENLRGV
Nbp35_Nos_cer     TS-----NFGKSE[QCNE]CPNQSI[CGT-VK]---PNDSLPLISANVSHF
Nbp35_Ent_bie     KK-----[QCEN]CPNRDNCYG-N--C-EDEDINLIKKNLQCF
Nbp35_Sac_cer     SD-----MAGKSDACGG[CANKEI]CESLP--KGPDPDIPLITDNLSGI
Nbp35_Neu_cra     SQ-----QAGTADSCAG[CPNQAI]CATAP--KGPDPDIPLITARLSGV
Nbp35_Hom_sap     SA-----QAGRGASCQG[CPNQRL]CASGA-GATPDTAIEEIKEKMKTV
Nbp35_Tri_vag     -----GNC[GS]SHAGT[CSSHGT]PEALQGALEECKTVLENV
Nbp35_Gia_int     APTPEQISLKGECAPDK[CSG]PARGA[CSSRGA]--DSSTSIAIAERIQHV
Nbp35_Ent_his     -----GGG--NNGPDRELEEIIIEKLKGI
Nbp35_Cry_par     SP-----DAGIADS[CA]G[CPNALI]CAS-G--Q-AKKKPTENIENLSKI

```

Cfd1\_Tra\_hom -LFISVVS **GKGGVGK**STIAALIAAKLSKQ--APTLLLDFDICGPSIGNIF  
 Cfd1\_Enc\_cun -SRIAVMS **GKGGVGK**SSVSIMLSTVLSEK--GRLLLLDFDLGSPSIASGF  
 Cfd1\_Enc\_int -VMVAVMS **GKGGVGK**SSISIMLSTAMSER--GKTLLLDFDLGSPSVASGL  
 Cfd1\_Nos\_cer PQKIAVMS **GKGGVGK**SSISILLSTILSEK--HKCLLLDFDLGSPSCFSSL  
 Cfd1\_Ent\_bie PKIYCILS **GKGGVGK**SAVA AFLALQLKKN--LKVLFIDFDICGPSAAIYF  
 Cfd1\_Sac\_cer KHIILVLS **GKGGVGK**SSVTTQTALTLC SMG-FKVGVLDDLTGPSLPRMF  
 Cfd1\_Neu\_cra KHIVLVLS **GKGGVGK**SSVTTQLALSLSLAG-HSVGVLDVLTGPSIPRMF  
 Cfd1\_Hom\_sap RHIILVLS **GKGGVGK**STISTELALALRHAG-KKVGILDVLCGPSIPRML  
 Cfd1\_Tri\_vag QNFILVMS **GKGGVGK**STTAANIARAYAAKY-GKVGLLDLDTGPSIPTLF  
 Cfd1\_Ent\_his KNVILVLS **GKGGVGK**STIATV LARSFALAG-KKTGILDIDL GGPSIPKMM  
 Nbp35\_Tra\_hom KKIIAVMS **GKGGVGK**STMCMQIAHALK-----KCCVLD FVDSGPSIAKMS  
 Nbp35\_Enc\_cun KAVIAVMS **GKGGVGK**STVTRNIAELMSSRG-IATCILDLDL SGPSIPRLT  
 Nbp35\_Enc\_int KTIVA IMS **GKGGVGK**STVVRNIAESVSSRG-ITTCILDLDL SGPSIPRLT  
 Nbp35\_Nos\_cer KLIFSIFS **GKGGVGK**STITRNIAEFLSLKN-YKVLLLDL DLSGPSIPKMT  
 Nbp35\_Ent\_bie KLILCIMC **GKGGVGK**SLLSVILAQYFSEK--FKTILIDL DLAGSSIPRLT  
 Nbp35\_Sac\_cer EHKILVLS **GKGGVGK**STFAAMLSWALSAD EDLQVGAMDL DICGPSLPHML  
 Nbp35\_Neu\_cra KHKILVLS **GKGGVGK**STFTSLLAHAFATNAEQTVGVMDT DICGPSIPKML  
 Nbp35\_Hom\_sap KHKILVLS **GKGGVGK**STFSAHLAHGLAEDENTQIALLDIDICGPSIPKIM  
 Nbp35\_Tri\_vag THKILVLS **GKGGVGK**STLTYILTKYLAK-T-KKVGVL DDLGGPSIPILF  
 Nbp35\_Gia\_int GRIILVLS **GKGGVGK**STLATQLAFLADTMGKYVGLLDL DICGPSIPTMT  
 Nbp35\_Ent\_his KHKYVILS **GKGGVGK**STFATQF SWVLSED--KQVGLCDY DICGPSIPQMF  
 Nbp35\_Cry\_par KNIILVLS **GKGGVGK**STISSQISWCLSSKK-FNVGLLDIDICGPSAPKMM

Walker A motif

Cfd1\_Tra\_hom PASGK-VVKTRT-GLKPLQVNN-----SS-LYILSMSSLI-KNDSSVI  
 Cfd1\_Enc\_cun GAKEN-VYKGEK-GLVPIRVSK-----N-LYILSMALLM-KSDSDVI  
 Cfd1\_Enc\_int GIKEK-IYKGEK-GLIPAKASE-----N-LYILSMALLM-KESDSVI  
 Cfd1\_Nos\_cer NGKGE-VKKAKK-GLTPIQITN-----N-LYVLSMGSMI-KPDDAVI  
 Cfd1\_Ent\_bie NVTGK-ITKHKH-GFKPLTLDL-----N-LDILSFGNIL-GENDVVI  
 Cfd1\_Sac\_cer GLENESIYQGPE-GWQPVK VETN----STGS-LSVISLGFLLGDRGNSVI  
 Cfd1\_Neu\_cra GIEDAKVTQAPG-GWLPITVHEADPSAGVGS-LRVMSLGFLLPKRGDAVV  
 Cfd1\_Hom\_sap GAQGRAVHQCDR-GWAPVFLDR-----EQS-ISLMSVGFLLLEKPDEAVV  
 Cfd1\_Tri\_vag GIQDKEIKSRNG-KMVP-QVVD-----G-VQIISLGLMLSDPHDAVI  
 Cfd1\_Ent\_his GLDNQGVYQGEHGGILPAKSKI-----GDTF-IDTLSVGFMLSSPDSPI  
 Nbp35\_Tra\_hom GTENAIITNVQD-TFVPVHVHG-----TCIGVVSAYHVNEWHSVEQL  
 Nbp35\_Enc\_cun GTDQQLMCETNG-RLQPVEVHG-----L-LKAVSAGYLQDPCEEGVV  
 Nbp35\_Enc\_int GTDGMCMCETSG-IIQPIEVNK-----F-LKVVS VGYLQD-CGEGIM  
 Nbp35\_Nos\_cer HTEGEIII ESNK-RFY PVKLSE-----N-LGCISVGYFADSQPSQNL  
 Nbp35\_Ent\_bie NTTDYFITNVEN-QFNPIKVNE-----LSVVSMGHIHNNISD--I  
 Nbp35\_Sac\_cer GCIKETVHESNS-GWTPVYVTD-----N-LATMSIQYMLPEDDSAI I  
 Nbp35\_Neu\_cra GVEGETIHVSST-GWSPAWAMD-----N-LAVMSIQFMLPNRDDAI I  
 Nbp35\_Hom\_sap GLEGEQVHQSGS-GWSPVYVED-----N-LGVMSVGFLLSSPDDAVI  
 Nbp35\_Tri\_vag NCDVEPLLD TTF-GFQPYHAAK-----N-INVVSIQFFLPDFDSPLV  
 Nbp35\_Gia\_int FTKTEQVQNLPM-GWEPVSVSH-----T-LQALSVGHLVTQEDAPVI  
 Nbp35\_Ent\_his GQIGVNVTSGMT-GLQPIYVTE-----N-LCTMSIGYLV-ATETAVV  
 Nbp35\_Cry\_par GVQGNVHISAN-GWSPVYVND-----N-LSVMSTAFLLPQSDDAVI

Cfd1\_Tra\_hom WRAPRKLQLYEMFYNSAYENILQNTTESDPDSYDILDKHNNIGNKTAQKN  
 Cfd1\_Enc\_cun WRGPKKMSVLSMFYESID-----  
 Cfd1\_Enc\_int WRGPKKMSVLSMFYESAD-----  
 Cfd1\_Nos\_cer WRGPKKLSLLNLFYDSID-----  
 Cfd1\_Ent\_bie WRGAKKQIFLELMFNTSLFK-----  
 Cfd1\_Sac\_cer WRGPKKTSMIKQFISDVAWG-----  
 Cfd1\_Neu\_cra WRGPKKTAMVRQFLSDVFWD-----  
 Cfd1\_Hom\_sap WRGPKKNALIKQFVSDVAWG-----  
 Cfd1\_Tri\_vag WRGPKKSAMINQFFQLIEW-----  
 Cfd1\_Ent\_his WRGPKKGAAIEQFLNDVEWG-----  
 Nbp35\_Tra\_hom YQPSFISSFLINVLSNCNFD-----  
 Nbp35\_Enc\_cun FSSTLKT SAMKLLKWC SYE-----  
 Nbp35\_Enc\_int FSSSFKTGIKKFLAQC NYE-----  
 Nbp35\_Nos\_cer FSSTYKTNTIRNILINGDIA-----  
 Nbp35\_Ent\_bie YTSEIKRYFIKNILKNCTMD-----  
 Nbp35\_Sac\_cer WRGSKKNLLIKKFLKDVVDWD-----  
 Nbp35\_Neu\_cra WRGPKKNGLIKQFLKDVEWG-----  
 Nbp35\_Hom\_sap WRGPKKNGMIKQFLRDVDWG-----  
 Nbp35\_Tri\_vag ARGPKKNALVLQLINQIDWS-----  
 Nbp35\_Gia\_int LRGPKKHGMVKQMLTETNWE-----  
 Nbp35\_Ent\_his WKGPKKNSLIRQFIHDVDWG-----  
 Nbp35\_Cry\_par WRGPKKNGLIKQFLSDVVG-----

Cfd1\_Tra\_hom VTVDESCQLGKYVVVIDTPPGITIVHSFIKE-----KN-  
 Cfd1\_Enc\_cun -----GFDNVVFDMPPGISEEHGFLIG-----KD-  
 Cfd1\_Enc\_int -----GFDNVVIDMPPGISEEHGFLVG-----KD-  
 Cfd1\_Nos\_cer -----DFDFVIIDTPPGVSEEHGFLID-----KN-  
 Cfd1\_Ent\_bie ---DEDGNFIYDAILIDTPPGISEEHGFLVG-----KKN-  
 Cfd1\_Sac\_cer -----ELDYLLIDTPPGTSDEHISIAE-----EL----RYSK-P  
 Cfd1\_Neu\_cra -----ETDYLLIDTPPGTSDEHISLAE-----NLLQKARPGQ-L  
 Cfd1\_Hom\_sap -----ELDYLVVDTPPGTSDEHMATIE-----AL----RPYQ-P  
 Cfd1\_Tri\_vag -----DCNTVIVDLPPGTSDEHLSTFD-----VLN---RN-NFS  
 Cfd1\_Ent\_his -----DKDVLVVDTPPGTSDEHITIMD-----FF----RKRNQE  
 Nbp35\_Tra\_hom -----TYTHVVVIDTPPGITDEHLIISN-----YV-----D  
 Nbp35\_Enc\_cun -----GTDVLLLDTPPNVTDEHLGMVN-----FI---R---P  
 Nbp35\_Enc\_int -----GVDVLLLDTPPNVTDEHLGMVN-----FI---K---P  
 Nbp35\_Nos\_cer -----DYEILIIDTPPNVTDEHLGIVN-----YL---K---L  
 Nbp35\_Ent\_bie -----NKEILILDTPPNITEEHFAIYN-----YI---C---N  
 Nbp35\_Sac\_cer -----KLDYLVIDTPPGTSDEHISINK-----YM---RESG-I  
 Nbp35\_Neu\_cra -----DLDFLLVDTPPGTSDEHLSVNT-----YL---KKS-G-I  
 Nbp35\_Hom\_sap -----EVDYLIVDTPPGTSDEHLSVVR-----YL---ATAH-I  
 Nbp35\_Tri\_vag -----DQDFLLVDTPPGTSDEHLSVVS-----FM---RDSE-I  
 Nbp35\_Gia\_int ---LDPRFPKSNIIIVDTPPGTSDEHLSIIDMYQNAIRYMQSNAPFPNVPV  
 Nbp35\_Ent\_his -----ELDYLIIDTPPGTSDEHLSIVS-----IL---NKN-V  
 Nbp35\_Cry\_par -----ELDFLIIDTPPGTSDEHLSIVS-----YL---NGSN-V

Walker B motif

Cfd1\_Tra\_hom TKILLVTTTSQNVAISDSINTINFFGK----ISGIIENMSGLKCPNCKKIT  
 Cfd1\_Enc\_cun VGALIITTPQNVSLGDSSKAIDFCASNGIRILGLVENMSGYCCECCGSSV  
 Cfd1\_Enc\_int ISVLIATTPQNIISLGDSSRAIDFCISNGIQILGLVENMSGYCCESC GNPT  
 Cfd1\_Nos\_cer IYSLIVTTTSQNVALSDTVKAIDFCCKINNIKILGIIENLSGYKNCCGHIT  
 Cfd1\_Ent\_bie VHSLIVTTGQNLALNCCQSTIEFCLYHNLNIIGVIONMSYVYCECCKHEKI  
 Cfd1\_Sac\_cer DGGIVVTTTPQSVATADVKEINFCKKVDLILGIIENMSGFVCPHCAECT  
 Cfd1\_Neu\_cra AGAVVTTTPQAVATADVKEINFCTKTNIRVLGVVENMCGFVCPNCSCT  
 Cfd1\_Hom\_sap LGALVVTTTPQAVSVGDVRELTFCRKTGLRVMGIVENMSGFTCPHCCTCT  
 Cfd1\_Tri\_vag YSVIIVTTTPNVLAVADVKEINFCLKVNAKIIGIIEENFCGVVCPCCNKVS  
 Cfd1\_Ent\_his TKAVIVTTTPQLVSTNDVEKEIDFCNECQIPIIGLVENMSGYLCPHCSTVT  
 Nbp35\_Tra\_hom AVCVLVSTPGVLAVNDLVRQIDFCERAGVKVLGVVENMREFVCE-CGCVV  
 Nbp35\_Enc\_cun RFGIVVTTTPQKFSLQDVARQVDFCRKARIEVLGIIENMKRFTCQKCGHSHK  
 Nbp35\_Enc\_int KFAIVVTTTPQKFSLQDVRQIDFCRKAKISVLGVIENMKRFVCPKCSHOK  
 Nbp35\_Nos\_cer NFAIVVTTTPQLISFQDVRQYTFCYKNNIKILGIIENMKGRFCEKCDLSQ  
 Nbp35\_Ent\_bie AKAILISTPHVLCCTTELNRQFIFCQKANIDIVGIVSNMDGIRCSKCNHIN  
 Nbp35\_Sac\_cer DGALVVTTTPQEVALLDVRKEIDFCCKKAGINILGLVENMSGFVCPNCKGES  
 Nbp35\_Neu\_cra DGAVMVTTTPQEVSLLDVRKEIDFCRKAGIKVLGLVENMSGFVCPKCTHES  
 Nbp35\_Hom\_sap DGAVIITTPQEVSLQDVRKEINFCKRVKLPPIIGVVENMSGFICPKCKKES  
 Nbp35\_Tri\_vag DGAVIVTTTPDEVSISDVRREIEFCQKAGVKILGVVENMSQYKCPMCGKTS  
 Nbp35\_Gia\_int LEAVVVSTTPQEVALLDVRKEINFCKQLNLHIKGVVENMSGFVCPFCETET  
 Nbp35\_Ent\_his DGAIITTPQDVSLIDVRKEINFCKKIGLPIIGVVENMSGFICPCCHKES  
 Nbp35\_Cry\_par NGALIVTTTPQEIALLDVRKEINFCKKVGLNILGVVENM-GMIFKNAEHS

Cfd1\_Tra\_hom NIY--SRNGGSQLAEEFNIPFYGTLEIDQNI SQFIENGTLY-----  
 Cfd1\_Enc\_cun NIF--GSKGGERLAEETGIPFVCRLPIDSL LCEALDEGRFV-----  
 Cfd1\_Enc\_int NIF--GARGGERLAMEMGVRFICELKIDPL LCEALDEGKFL-----  
 Cfd1\_Nos\_cer NIF--ASKGGQQLSQHYLINFIEKLP IEPFLGELLDTKEFI-----  
 Cfd1\_Ent\_bie YLY--GKNGGKLLAAEYGYEYLGEI PMESQMLNAIEQGQFP-----  
 Cfd1\_Sac\_cer NIF--SSGGGKRLSEQFSVPYLG NVPIDPKFVEM IENQVSSKK-----  
 Cfd1\_Neu\_cra NIF--MSGGGEVMANDFGVRFLGRVP IDPQFLVLIETGKRPTYAGTTVD  
 Cfd1\_Hom\_sap SVF--SRGGGEELAQLAGVPFLG SVPLDPALMRTLEEGHDF-----  
 Cfd1\_Tri\_vag PLL--GDKAAEIMSEELQLDILAKI PFLPQAASAADKGEKS-----  
 Cfd1\_Ent\_his NIF--SSNGGKELADKYQLKFGV GAIPIEPKICLAGETGLN-----  
 Nbp35\_Tra\_hom PM---GTVDVREVCLRRGVRYL GGLQCVKAVGMFADGGMVY-----  
 Nbp35\_Enc\_cun SIF--RSVGVESYCMSNGIAYLGS IDLKQDI AKRSDSGDTI-----  
 Nbp35\_Enc\_int NVF--VNTEVESYSKSNIGIPYLG SIDLRQDI AKASDIGRPT-----  
 Nbp35\_Nos\_cer DIF--YNSDIEQCKKENNLNYIGSL PLNIEYGKSGDNGILI-----  
 Nbp35\_Ent\_bie QLF--SKDIILKFCQNKYIQFLGE IEFNSQIVKNIDKGEVI-----  
 Nbp35\_Sac\_cer QIFKATTGGGEALCKELGKFLG SVPLDPRIGKSCDMGESF-----  
 Nbp35\_Neu\_cra EIFKATTGGGRKLAEMGIAFLG SVPLDPRIGMACDYGESF-----  
 Nbp35\_Hom\_sap QIFPPTTGGAEELMCQDLEVP LLGRVPLDPLIGKNCDKGQSF-----  
 Nbp35\_Tri\_vag SIYGHEFGGAEELCKQENLDLL GRIPIDPYIVAGQFEPQK-----  
 Nbp35\_Gia\_int PVIEATTGGVKKMCEDMHVPY IGSMPLDPQLMKAGEDGVAV-----  
 Nbp35\_Ent\_his TIFPPTHGGAKQMCEEMGVKFLGKI PLDPIIAHSCDIDGAPY-----  
 Nbp35\_Cry\_par SV-----KDMCDNMEVEYLNKI PWDKELLYVCDLGLSI-----

|               |                                                    |
|---------------|----------------------------------------------------|
| Cfd1_Tra_hom  | -----ENINSLGCNNVLDTVVR---K----                     |
| Cfd1_Enc_cun  | -----ERCGSIEAYMKFRKAVL---G----                     |
| Cfd1_Enc_int  | -----EKCGSIESYIRLRRSVL---E----                     |
| Cfd1_Nos_cer  | -----LKYQELKTYKILKKWINR--E----                     |
| Cfd1_Ent_bie  | -----SYCEATGIFNDIQRKIS---H----                     |
| Cfd1_Sac_cer  | -----TLVEMYRESSLCPIFEEIMKKLRKQDTT                  |
| Cfd1_Neu_cra  | GKDISTPAGASTSEEEVVDGSRVLVHKYKDCSLAPIFSKITADVISA--- |
| Cfd1_Hom_sap  | -----IQEFPGSPAFALTSIAQKILDATP-                     |
| Cfd1_Tri_vag  | -----D-----VILSFFNEVIDKIFPQQ--                     |
| Cfd1_Ent_his  | -----PFADEPSANALKPITDFVADLA--                      |
| Nbp35_Tra_hom | -----ED-----ALFAGVVRNITDE---                       |
| Nbp35_Enc_cun | -----EE-----EVLGKIVDAIMVVC--                       |
| Nbp35_Enc_int | -----RE-----EIFDRMADAVLSI---                       |
| Nbp35_Nos_cer | -----DD-----QIFSKTIDLIIINE---                      |
| Nbp35_Ent_bie | -----HIPQLKSIYSKLLSIIMEFVVPFNK-                    |
| Nbp35_Sac_cer | -----LDNYPDSPASSAVLNVEALRDA---                     |
| Nbp35_Neu_cra | -----FDSFPDSPACRALKGVVKG LATEMGL                   |
| Nbp35_Hom_sap | -----FIDAPDSPATLAYRSIIQRIQEFCNL                    |
| Nbp35_Tri_vag | -----DLPEAINDAASVICEKIQQKLS-----                   |
| Nbp35_Gia_int | -----STICDIDTSPGYDAFANICGKII-----                  |
| Nbp35_Ent_his | -----FLEHPDSEATKNFKRIYKEIIT----                    |
| Nbp35_Cry_par | -----CEKFPQSPSSIGIKKLVDI I IYQ----                 |

|               |                  |
|---------------|------------------|
| Cfd1_Tra_hom  | -----LVGS        |
| Cfd1_Enc_cun  | -----LADI        |
| Cfd1_Enc_int  | -----ITNI        |
| Cfd1_Nos_cer  | -----NWF         |
| Cfd1_Ent_bie  | -----L--L        |
| Cfd1_Sac_cer  | TPVVDKHEQPQIESPK |
| Cfd1_Neu_cra  | -----VQQ         |
| Cfd1_Hom_sap  | -----ACLP        |
| Cfd1_Tri_vag  | -----KAAQ        |
| Cfd1_Ent_his  | -----KTFA        |
| Nbp35_Tra_hom | -----LEK         |
| Nbp35_Enc_cun | -----SSKA        |
| Nbp35_Enc_int | -----HES         |
| Nbp35_Nos_cer | -----IK          |
| Nbp35_Ent_bie | -----KNDFN       |
| Nbp35_Sac_cer | -----VGDV        |
| Nbp35_Neu_cra | DPEV----VMPEEDDA |
| Nbp35_Hom_sap | HQS----KEENLISS  |
| Nbp35_Tri_vag | -----A           |
| Nbp35_Gia_int | -----E           |
| Nbp35_Ent_his | -----NL          |
| Nbp35_Cry_par | -----SKIN        |

Abbreviations: Tra\_hom, *Trachipleistophora hominis*; Enc\_cun, *Encephalitozoon cuniculi*; Enc\_int, *Encephalitozoon intestinalis*; Nos\_cer, *Nosema ceranae*; Ent\_bie, *Enterocytozoon bieneusi*; Sac\_cer, *Saccharomyces cerevisiae*; Neu\_cra, *Neurospora crassa*; Hom\_sap, *Homo sapiens*; Tri\_vag, *Trichomonas vaginalis*; Gia\_int, *Giardia intestinalis*; Ent\_his, *Entamoeba histolytica*; Cry\_par, *Cryptosporidium parvum*.

The major structural difference between Cfd1 and Nbp35 is the presence in Nbp35 of an N-terminal Cys-X<sub>13</sub>-Cys-X<sub>2</sub>-Cys-X<sub>5</sub>-Cys ferredoxin-like motif (labelled in red) coordinating a [4Fe-4S] cluster<sup>26-28</sup>. The insertion of this cluster depends on electron transfer from the Tah18-Dre2 complex<sup>29</sup>. The genome of *E. histolytica* lacks homologues of Tah18 and Dre2, which is consistent with the loss of the ferredoxin-like motif in *E. histolytica* Nbp35<sup>30</sup>. Cysteine residues in the CX<sub>18</sub>CPXCX<sub>2</sub>C (Cfd1) and CX<sub>18</sub>CX<sub>2</sub>CX<sub>38</sub>C (Nbp35) motifs that are conserved at the C termini of yeast Cfd1 and Nbp35 homologues are labeled in yellow and dark green respectively. The two central cysteine residues of both motifs, which are conserved in microsporidian sequences, are essential for yeast viability and for maturation of cytosolic and nuclear Fe/S proteins. These motifs also have a critical role in Cfd1-Nbp35 complex formation<sup>26,28,31</sup>. Cfd1 and Nbp35 are classified as Mrp-like proteins that belong to the Mrp/Nbp35 subfamily of P loop NTPases. Nucleotide binding and/or hydrolysis is apparently critical for loading an Fe/S cluster onto the Cfd1-Nbp35 complex. The consensus Walker A motif of the Mrp family and the ENMS motif are labeled in pink and light blue respectively. The Asn in the ENMS motif is predicted to form a contact with the adenine from ATP<sup>32</sup>. The Walker B motif with a conserved Gly residue (typically, within the signature hhhhDxxG, where h is a hydrophobic residue) is labeled in green.

## f. WD40 protein Cia1

```

Cial_Tra_hom      M-----K-----ITERGSAQFDEKLL--SLAVTKDSVLTGG
Cial_Enc_cun      M-----K-----KYRITSKKLGEKIL--AVHA-GKSIYTGG
Cial_Enc_int      M-----K-----KYKITSKRLDEKIL--AVHV-NGAVYTGG
Cial_Sac_cer      MASI--NLIKS-----LKL---YKEKIW--SFDFSQGILATGS
Cial_Neu_cra      MATETTTATPTAPSATTAETPLPAFSPDLYQRAWASIPHPSLPLIATCH
Cial_Hom_sap      MKDSL-VLLGR-----VPA--HPDSRCWFLAWNPAAGTLLASCG
Cial_Gia_int      MVHDRVSLLNH-----TAA--HTDRIWRLRASHTGELVASCS
Cial_Ent_his      M-----QLVDS-----FEV-----P-----
Cial_Cry_par      MGSLEKLGIT-----IGV--LDSAIWSVASHPKDRIIASCG

Cial_Tra_hom      TKK-ILHKL-----STDLH---TQKILC--QHEK-
Cial_Enc_cun      TSR-ML-----VNQD---TGEVMC--RCKK-
Cial_Enc_int      TSR-TL-----VNQD---TGEVMC--RCRK-
Cial_Sac_cer      TDRKIKLV-----SVKY--DDFTLIDVLDVLETAHKK-
Cial_Neu_cra      A-HSVTVF-----SLST--LS--KHSVLT--GGHTR-
Cial_Hom_sap      GDRRIRIW-----GTEG--DSWICKSVLS--EGHOR-
Cial_Gia_int      ADGSMAIW-----RASKDLSLQLVQRLQ--PGHDNP
Cial_Ent_his      -----LKPLLT--PHNR-
Cial_Cry_par      S-S-IVVWMDTKLKNHKWYQEIEIVNKCSMAG-NSWVKAYEFGSLEHKR-

Cial_Tra_hom      -SIRCIA--AKD-----GVIVCGSYDGNATVLY-----
Cial_Enc_cun      -SVRSIA--SHG-----RYVCCGSYDCTAVLFH-----
Cial_Enc_int      -SIRSIA--SHG-----RYICCASYDCTAVLFH-----
Cial_Sac_cer      -AIRSVAWRPHT-----SLLAAGSFDSTVSIWAKEE-----
Cial_Neu_cra      -SVRSAAWQPPRGKVSQKEAKRLRLVLTGSFDTTAGVWTDQGRREESLER
Cial_Hom_sap      -TVRKVAWSPCG-----NYLASASFDATTCIWKN-----
Cial_Gia_int      VIVRDCAFSAND-----QHLVVAAYDGSMYVYDLID-----
Cial_Ent_his      -TIRRVKCSKNG-----LLACCSFDSTVSLWE-----
Cial_Cry_par      -LIRKIAWSPCG-----GMIISASFDSSISVWEFVS-----

Cial_Tra_hom      -----EDKILDLI-EGPETEIKGVDLLNGNRRDN
Cial_Enc_cun      -----DGKVVDVI-EGPDTEVKCVAFSEDG---R
Cial_Enc_int      -----DGKVVDVI-EGPDTEIKCVGFSEDG---R
Cial_Sac_cer      -----SADRTFEMDLLAI-EGHENEVKGVAWSNDG---Y
Cial_Neu_cra      EIRLQSGENDQEAEAEAEAEDEWELTLVL-EGHENEVKS VNYSVPSG---Q
Cial_Hom_sap      -----QDFECVTTL-EGHENEVKSVAWAPSG---N
Cial_Gia_int      -----ELTKGDPFQLTAI IANAHEKEIKSVDISKEG---
Cial_Ent_his      -----LNENTIIGTL-EGHESEVKCVDWVSGS---N
Cial_Cry_par      -----RDI GWACICKI-LGPESEVKCVDWVSPFN---N

Cial_Tra_hom      YIALSTRGKTVWVC-----KLN---DKIEIDSILEDHTQDV
Cial_Enc_cun      YLAMATRGRSVWV-----KID---GEIEIDGVIEDHLHDV
Cial_Enc_int      YLAMATRGKSVWV-----KID---PEIEIDEIIEDHLHDV
Cial_Sac_cer      YLATCSRDKSVWIW-----ETDES GEEYECISVLQEHSDQDV
Cial_Neu_cra      YLATCSRDKSVWIWEDVGNPNPSSEEEDEEEDEDEWETVAVLQEHGDV
Cial_Hom_sap      LLATCSRDKSVWV-----EVD-EEDEYECVSVLNSHTQDV
Cial_Gia_int      TVAACSRDRFVSFW-----RPCSDSPDYDCIGLFNNHTEDI
Cial_Ent_his      MVATCSRDKSVWLWKS-----SGIDYECCSVLTGHSGDV
Cial_Cry_par      FVAACCRDRAIWFSLDI-----GENRKLGTLEIYDCIGVVTHTNDI

```

Cial\_Tra\_hom KGVKFF-----NNLLYTYGYDNTVKVYQRFTMY-----  
 Cial\_Enc\_cun KGCIFH-----GGLLFTYGYDNTVKVYDRF-DY-----  
 Cial\_Enc\_int KGCVFH-----KGFLFTYGYDNTIKIYERF-DY-----  
 Cial\_Sac\_cer KHVIWHPS-----EALLASSSYDDTVRIWKD---Y-----  
 Cial\_Neu\_cra KAVAWCPDVPGRKGYAPPRRYGDDVVLASASYDNTVRLWRED--G-----  
 Cial\_Hom\_sap KHVVWHPS-----QELLASASYDDTVKLYRE---E-----  
 Cial\_Gia\_int KCVRF SRN-----GHYLV SASYDNNICLYKRCL ETADDLG  
 Cial\_Ent\_his KTVLFHPS-----GTILFSGSFDGTIKVWKGE--E-----  
 Cial\_Cry\_par KKIKWHPT-----IPMVL LSCSYDNTIIAWAPS--S-QLLG

Cial\_Tra\_hom -----DDSWVLLQSLEAQKE-----TVWDVEML-  
 Cial\_Enc\_cun -----DDSWELVQSID-ERS-----TVVCVIFH-  
 Cial\_Enc\_int -----DDSWELVQSID-EKN-----TVVCVIFH-  
 Cial\_Sac\_cer -----DDDWECAVLNGHEG-----TVWSSDFDK  
 Cial\_Neu\_cra -----DGEWVCVAVLEGHEG-----TVWGVAVEG  
 Cial\_Hom\_sap -----EDDWVCCATLEGHEG-----TVWSLAFDP  
 Cial\_Gia\_int E--EEIESWIFAGSTKSELDLNSCEMNAPDSEIVASGASCHTVWTAIFMA  
 Cial\_Ent\_his -----ETEWSSELQTIQAYGK-----TVWDLKITK  
 Cial\_Cry\_par HDEVKGLEWVKLYTLNGHSS-----TVWDFTYSP

Cial\_Tra\_hom -----TKLFVASNDGCIYVYRK-----  
 Cial\_Enc\_cun -----NGRMVCTTEEGTVSIYAL-----  
 Cial\_Enc\_int -----GDKMVCSTEEGTISSYVL-----  
 Cial\_Sac\_cer -----TEGVFRLCSGSDSTVRVWKYM-GDDED-----  
 Cial\_Neu\_cra RPRENDKFPRLLSWGADEVIRVWSLK-EPEEEHGE---GAAGGGNNT  
 Cial\_Hom\_sap -----S--GQRLASCSDRTRVRIWRQYLPGNEQG-----VACSGS---  
 Cial\_Gia\_int -----N--NSSILAVDGNGCIRCYNII-----  
 Cial\_Ent\_his -----E--GKFIVAGCANGVIILYEFK-----  
 Cial\_Cry\_par -----N--GEFL LSCSDSSIVLWNSN-QGNENKFKNLNSVNFALTDTFKM

Cial\_Tra\_hom -----EKDWW-FDYCCNISVYPILSLCRIR-----  
 Cial\_Enc\_cun -----RSGWT-LEMSRKL SVLPIYSICSVG-----  
 Cial\_Enc\_int -----RNGWE-LEACKKLSIFPIYSICSVG-----  
 Cial\_Sac\_cer -----QQEWVCEAILP DVHKRQVYNVAVG-FN-----  
 Cial\_Neu\_cra WGFVPNTMRR-----SLKEEWECTAVLPKVHKGDIYSVAWSTET-----  
 Cial\_Hom\_sap -----DP--SWKCICTLSGFHSRTIYDIWCQLT-----  
 Cial\_Gia\_int -----EGGVKQLGCTILHGRRPVYDISLVEPRHASK  
 Cial\_Ent\_his -----DNLLVELDTINNEKYRDIYSIDIND-----  
 Cial\_Cry\_par IFYNTPNTRKLSKYIQID-QANSFINNYDKELYSYPIYSIEWCNYI-----

Cial\_Tra\_hom ---DFLALAVDSKSLVI-----VDES LQVKC  
 Cial\_Enc\_cun ---ENMAYVLNRSSIGI-----VDSNLNLVM  
 Cial\_Enc\_int ---RDMAYVLNRNNIGI-----IDSNLNLTT  
 Cial\_Sac\_cer ---GLIASV GADGVLAVYEE-----VDGEWKVFA  
 Cial\_Neu\_cra ---GLLSSVGS DGV LALYQ ETANTTEKNEENETNGEAPTTSAGGWKVL T  
 Cial\_Hom\_sap ---GALATACGDDAIRVFOEDPNSD-----PQQPTFSLTA  
 Cial\_Gia\_int ASSIYIATAGQDGVVCLSIIN--P-----ITGTATPIV  
 Cial\_Ent\_his ---NNVLVGS GDN AIRL FKIN--T-----IKKKLELIE  
 Cial\_Cry\_par ---NCIIVSSADKSLHLFSV--T-----DSKRLKHIC



```

Cial_Tra_hom      SLEDAHQK-DINCVKYSDD-----NNMLVTCSDDGCLKVYHVDF-
Cial_Enc_cun      SIENVHED-SINSIVYDEG-----RNRIVSGGDDGILNTIEL--
Cial_Enc_int      TIEDIHED-FINGIAYDEG-----RGRIISGGDDGILNVIEM---
Cial_Sac_cer      KRALCHGVYEINVVKWLEL-----NGKTILATGGDDGIVNFWWSLEK-
Cial_Neu_cra      TVKGAHGYPYEINHITWCKRYDAGSERKGEEEMLVTTGDDGVVRPWQVR--
Cial_Hom_sap      HLHQAHSQ-DVNCVAVNPK-----EPGLLASCSDDGEVAFWKYQRP
Cial_Gia_int      HITGAHDG-EVNSVCDITQ----AVATDGHVVVCSGGDDGCINIWRIST-
Cial_Ent_his      EKQDAHTN-DVNCVKWIN-----KTLSISVGDDNMLKIWKI---
Cial_Cry_par      ERPNAHNS-EINSVSWLND-----NKRGEFISAGDDGEIALWRFD--

Cial_Tra_hom      -SE
Cial_Enc_cun      --L
Cial_Enc_int      --F
Cial_Sac_cer      -AA
Cial_Neu_cra      -IQ
Cial_Hom_sap      EGL
Cial_Gia_int      -EE
Cial_Ent_his      -VN
Cial_Cry_par      -FE

```

Abbreviations: Tra\_hom, *Trachipleistophora hominis*; Enc\_cun, *Encephalitozoon cuniculi*; Enc\_int, *Encephalitozoon intestinalis*; Sac\_cer, *Saccharomyces cerevisiae*; Neu\_cra, *Neurospora crassa*; Hom\_sap, *Homo sapiens*; Gia\_int, *Giardia intestinalis*; Ent\_his, *Entamoeba histolytica*; Cry\_par, *Crystosporidium parvum*.

Cial belongs to the WD40-repeat protein family. WD40 repeats are conserved domains of approximately 44-60 residues that typically contain the GH dipeptide 11-24 residues from its N terminus and the WD dipeptide at the C-terminus. The WD repeat combines a conserved core structure with variable regions that are probably surface-exposed. Most WD proteins contain a cluster of at least 7 or more copies of WD-repeats with as many as 16 but as few as four. A WD protein forms a propeller-like structure with several blades where each blade is composed of a four-stranded anti-parallel  $\beta$ -sheet. Each WD40 sequence repeat forms the first three strands of one blade and the last strand in the next blade. The proposed common function of this protein family is to coordinate the assembly of multi-protein complexes by functioning as a docking site for other proteins. Residues on the top and bottom surface of the propeller are proposed to coordinate interactions with other proteins and/or small ligands<sup>33,34</sup>. The 3D structure of the Cial protein from *S. cerevisiae* shows the typical architecture of other WD40-repeat proteins<sup>35,36</sup>. The  $\beta$  propeller structure contains three potential interacting surfaces: The top, the bottom and the circumference<sup>35,36</sup>. The WD40 repeats are shadowed in yellow. The seven WD40 repeats in *S. cerevisiae* were obtained from Unipropt KB: <http://www.uniprot.org/uniprot/Q05583> and the WD40 repeats from the other organisms were obtained from SMART: <http://smart.embl-heidelberg.de/>. Note that Tra\_hom has four inferred WD repeats, Enc\_cun and Enc\_int have five WD repeats, Gia\_int and Ent\_his have six WD repeats. The arginine (R) in green is critical for the function of Cial in yeast<sup>36</sup> and is conserved in all of the microsporidian sequences. In bold are the invariant residues present also in the microsporidian sequences.

**g. Cia2**

Cia2\_Tra\_Hom -----MNREPELFE-SAVPECT-----  
 Cia2\_Enc\_cun -----MNEFPFVAS-SLEERHP-----  
 Cia2\_Enc\_int -----MNKSPFVSS-SLERRY-----  
 Cia2\_Nos\_cer -----MNI SPQIKNKNFENRFD-----  
 Cia2\_Ent\_bie -----MNNPNI INQFPSLRS-KSYSRVN-----  
 Cia2\_Sac\_cer MSEFLNENPDILEENQLPTRKEDSTKDLLLGGFSNEATLERRSLLKIDHSLKSQVLQDI  
 Cia2\_Neu\_cra -----MAKSDLNANPTVLSVSQLPSRNLAAGHVRKGP  
 Cia2B\_Hom\_sap -----MVGGGVGGGGLLENANPLIYQ-----  
 Cia2A\_Hom\_sap -----MQRVSGLLSWTLSRVLWLSG-----  
 Cia2\_Gia\_lam -----MAPHAPYTAGPFFNRGR-----  
 Cia2\_Tri\_vag -----MAANPNPVVYGS AKYVR-----  
 Cia2\_Cry\_par -----

Cia2\_Tra\_Hom -----EQFDP---NKLTKGMVF-----  
 Cia2\_Enc\_cun -----ISMSNGVLQNVTRQSVF-----  
 Cia2\_Enc\_int -----IDISDGILQEITQYSVF-----  
 Cia2\_Nos\_cer -----LHFKDKLLTDISVDSVF-----  
 Cia2\_Ent\_bie -----LDFENGYLREVTAEAF-----  
 Cia2\_Sac\_cer EVLDKLLSIRIPPELTSDSDSLPAESEDESVAGGGKEEEEPDLIDAQEIY-----  
 Cia2\_Neu\_cra DSKYDHILFPKQWWAGSSLNTDPSVWTSDEDEDLTLATEEPIDEQEIYGENYDPSSCT  
 Cia2B\_Hom\_sap -----RSGERPVTAGEEDEQVPDSIDAREIF-----  
 Cia2A\_Hom\_sap -----LSEPGAARQPRIMEEKALEVY-----  
 Cia2\_Gia\_lam -----PEDYEPITPEEVF-----  
 Cia2\_Tri\_vag -----STEDDLSPERE AIDSL ELY-----  
 Cia2\_Cry\_par -----DVY-----

Cia2\_Tra\_Hom ELIRHIKDPEHP-YSLEILNVVNLD SIEIKEISTTY-----GKNLQQVVVHFQPTIPH  
 Cia2\_Enc\_cun ELIRDIRDPEHP-YTLEQLGVVSREGV SIGCIGPDG-IAPNVGLPIRCVKVVFKPTIPH  
 Cia2\_Enc\_int ELIRDIRDPEHS-YTLEQLGVVSREGITIGLIDSDG-IAPSAGLPIKYIKVMFKPTIPH  
 Cia2\_Nos\_cer ELIRDIKDPEHP-YTLEELNVVRKDLIKIYQLKDEY-VVEDI---INCIEVQFEPTIPH  
 Cia2\_Ent\_bie ELIRDIQDPEHP-YTLEDLGVVSLSDIKIYTVYNNNTNIKCTDGFPLKFI EVQFTPTVPH  
 Cia2\_Sac\_cer DLIAHISDPEHP-LSLQLSVNVLEDIDVHDSGNQN-----EMAEVVIKITPTITH  
 Cia2\_Neu\_cra YLLSTISDPEHP-VTLGQIAVVRLLDHIHLSPPAER-----LDPNTLTNVEVDLTPTVNH  
 Cia2B\_Hom\_sap DLIRSINDPEHP-LTLEELNVVEQVRVQVSDPE-----STVAVAFPTPTIPH  
 Cia2A\_Hom\_sap DLIRTIRDPEKP-NTLEELEVVS E SCVEVQEINEEE-----YLVIIRFTPTVPH  
 Cia2\_Gia\_lam DIIRSVRDPEHMNTLEDLRVNVNLDITVMDEQG-----LVRVYPTPTPT  
 Cia2\_Tri\_vag NYIRLIKDPEHP-FSLEQLHIVSPDDIKVDDKEGR-----VNLVFTPTVPH  
 Cia2\_Cry\_par ECIKDIIDPEYP-LTLEQLNVVSL ENIIIN-----HEEQIIFVFFKPTVTS

Cia2\_Tra\_Hom SMAAIIIGLCIFYVLKARL-DTFWIRVQIAE--DTHVNWKTINKQLDDKDR TNAAFENTS I  
 Cia2\_Enc\_cun SMAAVIGLCIKTHVSRHV-RNHVQVHIVD--GGHINFALNKQLDDKDRVLAATENEVL  
 Cia2\_Enc\_int SMAAIIIGLCIKAQINQYI-ENHFIQVHIVN--DGHINFKALNKQLDDKDRVLAAMENETL  
 Cia2\_Nos\_cer SMAAIIIGLI IKILLEKYYI-KGYIIVSILE--GSHVNDKMLNKQLKDKDRVQAASENEAL  
 Cia2\_Ent\_bie SLVGIIGLSIAYQLYKHT-RNYVIKLRITK--GSHHQEEIYNKQLNDRERVFAAFENESI  
 Cia2\_Sac\_cer SLATLIGLGIRVRLERSLPPFRITILLKK--GTHDSENQVNKQLNDKERVAAACENEQL  
 Cia2\_Neu\_cra SLATVIGLAVRVLENALPPNYR--IIVRMKDGSHAQDDQVNKQLGDKERVAAALENDTL  
 Cia2B\_Hom\_sap SMATLIGLSIKVKLLRSLPQRFKMDVHITP--GTHASEHAVNKQLADKERVAAALENTHL  
 Cia2A\_Hom\_sap SLATLIGLCLRVKLRCLPQRFKLEIYISEG--THSTEEDINKQINDKERVAAAMENPNL  
 Cia2\_Gia\_lam SLGSIIGLSLKI KLD RCLPRRFCSVYCKD--GTHENAISLNKQINDKERALALTNKNI  
 Cia2\_Tri\_vag SLPAVLGLCIRERLLQVLPQRFH SKIFITVARGKHIQEDSINRQLRDKERCLAALERRNI  
 Cia2\_Cry\_par SQASLIGLSLYYKLHTVFNKNFKI I IKVVK--GTHDLEDSINKQLKDKERVHAALENPQI

```

Cia2_Tra_Hom   LNLIGDCIGPCSV-----
Cia2_Enc_cun   LDLMEKCLPAI-----
Cia2_Enc_int   LDLMKECLPRHGELLDMPK--
Cia2_Nos_cer   LEIIDECLVSIIDKYDL----
Cia2_Ent_bie   LEI IENSINK-----
Cia2_Sac_cer   LGVVSKMLVTCK-----
Cia2_Neu_cra   KGIIEKMLETVCV-----
Cia2B_Hom_sap  LEVVNQCLSARS-----
Cia2A_Hom_sap  REIVEQCVLEPD-----
Cia2_Gia_lam   ASVVNTAIRI-----
Cia2_Tri_vag   RTMIDNCIACDDEEE-----
Cia2_Cry_par   YKTITKGLANSDVWEDQSLLY

```

Abbreviations: Tra\_hom, *Trachipleistophora hominis*; Enc\_cun, *Encephalitozoon cuniculi*; Enc\_int, *Encephalitozoon intestinalis*; Nos\_cer, *Nosema ceranae*; Ent\_bie, *Enterocytozoon bieneusi*; Sa\_cer, *Saccharomyces cerevisiae*; Neu\_cra, *Neurospora crassa*; Hom\_sap1-3, *Homo sapiens*; Gia\_lam, *Giardia lamblia*; Tri\_vag, *Trichomonas vaginalis*; Cry\_par, *Crystosporidium parvum*.

The DUF59 (PF01883) domain identified using SMART (<http://smart.embl-heidelberg.de> and pfam database: <http://pfam.xfam.org>) is highlighted in light blue. Yeast mutants where the hyper-reactive cysteine (red – universally conserved across aligned sequences) is replaced by alanine are not viable<sup>37</sup>. Cia2 is part of the CIA targeting complex (with Cia1 and Mms19) which facilitates the insertion of [4Fe-4S] clusters into cytosolic and nuclear apoproteins<sup>38,39</sup>. Humans possess two isoforms of Cia2. CIA2B, together with CIAO1 and MMS19, is required for maturation of the bulk of cytosolic and nuclear Fe/S proteins. CIA2A binds to CIAO1 and IRP2 and is involved in cellular iron regulation. The human CIA targeting complex CIA2B-CIAO1-MMS19 binds to numerous Fe/S proteins presumably reflecting the apoforms<sup>38,39</sup>.

## h. Hydrogenase-like NarI

NarI\_Tra\_hom MRRP-----HMNKKINPCKI-----  
 NarI\_Enc\_cun MDAL--IRPPMSFFADLPKDNKKCKI-----  
 NarI\_Enc\_int MSFF-----AGLSKNNQKCKI-----  
 NarI\_Nos\_cer MNT-----ENKPCI-----  
 NarI\_Sac\_cer MSAL----LSESDLNDFISPALACVKPTQ-----VSGGKKDNVNMNGEY  
 NarI\_Neu\_cra MSAI----LSVDDLNDFISPGVACIKPIETLPTAAPPAGDANS SLEVEVI  
 NarI\_Hom\_sap MASPFSGALQLTDLDDFIGPSQECIKPVKVEKRA-GSGVAKIRIEDDGSY  
 NarI\_Tri\_vag MSAD-----PAASTSFDC LHPV SIEE-----  
 NarI\_Gia\_int MSLK-----VKVASDLNLTLP EECV VPLK PADAP-STGTVKLR LK-----  
 NarI\_Ent\_his MSLS--VGLQIAGVDDYIQQNLVCMPLKETPP--QEHKGAAKISLGGP-  
 NarI\_Cry\_par MFST---AVKLANLDDYLESSQDCIVSLLSDK---DDTKPKIAVMRPAKA

NarI\_Tra\_hom -----GEKPFELTLNDCLACSGCV-SMEETKITAE----DLQ---  
 NarI\_Enc\_cun -----IGSPLALSLSDC LACSGCV-SADEAGALSEDLS-FVL---  
 NarI\_Enc\_int -----TDTPFNLSLSDC LACSGCV-TTDEAGALSADIS-FVR---  
 NarI\_Nos\_cer -----SPFTFKLEDCLACSA CI-ADFSVPKIPTY--TELK---  
 NarI\_Sac\_cer ---EVSTEPDQLEKVSITLSDCLACSGCI-TSSEEILLSSQSHSVFLKNW  
 NarI\_Neu\_cra LDGQQPEAKSNAPPAEISLTDCLACSGCV-TSAEAVLVSLQSHNEVLNML  
 NarI\_Hom\_sap FQINQDGGTRRLEKAKVSLNDCLACSGCI-TSAETVLI TQQSHEELK KVL  
 NarI\_Tri\_vag ---RGRVKADDEATFKVTLQDCLACSGCAITKDEITII SEQNTSRI FEKL  
 NarI\_Gia\_int ---ACDAAPVSSTPVKITINDCLMCSGCV-TSAEEVFFRELN T TALQNAI  
 NarI\_Ent\_his ---EEGNELPKLTKVTVRLEDCLACSGCI-TSAETVLI EQQLPEFRKNI  
 NarI\_Cry\_par QGNKDDKSGTSDKATVNVADCLACSGCV-TSAEAKLLEDQNVSEFMNII

NarI\_Tra\_hom -----NVPINLIMSHYSVLNLCNEIKKQQ  
 NarI\_Enc\_cun -----DLSPQTSFVLSPQSKINIFNLYR---  
 NarI\_Enc\_int -----DSAPQTSFVLSPQSKVNIFNIYG---  
 NarI\_Nos\_cer -----DVPLTFLLSPH SKM MYAHYN---  
 NarI\_Sac\_cer GKLS-----QQQDKFLVSVSPQCRSLAQYYG---  
 NarI\_Neu\_cra DSAPALKLVGPDANGKHSVQGLENSDAKLYVASVSPQSRASLAAACG---  
 NarI\_Hom\_sap DANKM-----AAPSQQRLVVSVSPQSRASLAARFQ---  
 NarI\_Tri\_vag -----DEVKDYIVLVATHV VANLA AVRN---  
 NarI\_Gia\_int TSGP-----KAGRPIVLSLSQSAILSLSRVL---  
 NarI\_Ent\_his KEL-----SQRKKVICTIADECIASMSVVHN---  
 NarI\_Cry\_par -----KQKRLTVVSI SNQSCSSFACHLN---

NarI\_Tra\_hom LKQNKDDSTNLHAI TVKEWYA-YLQNALRRKFSVK-----R-----  
 NarI\_Enc\_cun -----EDGMEYREFEA-VLSSFLRSKFNIH-----R-----  
 NarI\_Enc\_int -----KGNMSYREFEG-ALSSFLRAKLNVR-----R-----  
 NarI\_Nos\_cer -----NHIMSFSDFEY-HLISFIKLFNVI-----K-----  
 NarI\_Sac\_cer -----LTLEAADL-CLMNFFQKHFQCK-----Y-----  
 NarI\_Neu\_cra -----NG-VTEQQAGR-MIEQLFLGEQGLARGGK WGNKF-----  
 NarI\_Hom\_sap -----LNPTDTAR-KLTSFF-KKIGVH-----F-----  
 NarI\_Tri\_vag -----WSAAKA FS-TIKQLF-L-----SKGAQKV-----  
 NarI\_Gia\_int -----LDITSVEPCTVDTL FK-QLEYALRTRVAGLRHCTYED  
 NarI\_Ent\_his -----QPFNVVWT-RVEKAL-KKEGVD-----E-----  
 NarI\_Cry\_par -----CDLITIQR-KLSGLF-KHIGAR-----F-----

Narl\_Tra\_hom -----IVNTYDYQQLSNYMIYNE-----L--LTKNKLILSEC  
Narl\_Enc\_cun -----IVDTSYLRSKIYEETYRE-----Y--MATNHLIVSAC  
Narl\_Enc\_int -----IVDTSSMRRKIYKEIYKE-----Y--LATDHLVISAC  
Narl\_Nos\_cer -----VYDTSYVKNILYDSVYE-----E--STRDKIIISDC  
Narl\_Sac\_cer -----MVGTEMGRIISISKVTEKI--IAHKKQKENTGADRKPLLSAV  
Narl\_Neu\_cra ---TWVVDTNTAREATLVLGSDEV--LGGLIAPSD--KAATPVLTA  
Narl\_Hom\_sap -----VFDTAFSRHFSLLESQREF--VRRFRGQAD-CRQALPLLASA  
Narl\_Tri\_vag -----VLDTD-IQLVFRRLVVKEF--IEN-----QTLSPFMISRC  
Narl\_Gia\_int APPVYVSEAQHQEQSVLMNVRQISFLMQS---SE--PRSNIAIITHC  
Narl\_Ent\_his -----LRDLSQAQDISLFGIYDEF--KEYQ-----KMNKVLTTSTC  
Narl\_Cry\_par -----VMNSTISEYISLLETKEYEF--ISRYKA-----KSDLPMIISHC

Narl\_Tra\_hom VVAYVERRR-PDLIPYLSEVPSLQQMCAYLCEEEG-----  
Narl\_Enc\_cun VVTYIERTA-PYLIGYLSRVKSPQQMAFSLVKG-----  
Narl\_Enc\_int VVAYVERTA-PHLIDYLSRVKSPQQMAFSLVKG-----  
Narl\_Nos\_cer TVSYIERQA-HHLIEYLSVTSTQQQAIKLLAQ-----  
Narl\_Sac\_cer FLIYTEKTK-PQLVPMLLNKSPQQITGSLIRATFESLAI-----  
Narl\_Neu\_cra WVCYAEKTH-PYVLPHLRSRVKSPQALMGTLKTSLSRILD-----  
Narl\_Hom\_sap WICYAEKTHGSFILPHISTARSPPQVMGSLVKDFFAQQQH-----  
Narl\_Tri\_vag SVVYYERKT--SYADHLAQIKPYPQLYAMYEKKILQ-----  
Narl\_Gia\_int VRLFITKRN-RELISYIVSTASPMELFGASYCGIDA-----  
Narl\_Ent\_his WVCYSEKMQGKWMFEYMSKVASSMTIAGMIMKKQNS-----  
Narl\_Cry\_par WICYSEKSLNSSVLPLLSKVRSAQQLOGILIKTLTLEIYNQLFLYKFR

Narl\_Tra\_hom -----VLTVGVMQCHDKRLEGGV---RV--  
Narl\_Enc\_cun -----SRTVSVMPQDKKLENGRDGVK---  
Narl\_Enc\_int -----DRTVSVMPQDKKLESGRDGVK---  
Narl\_Nos\_cer -----GRSISVIQCYDKFLENSDDVLT--  
Narl\_Sac\_cer -----ARESFYHLSLMPCFDKKLEASRPESLD--  
Narl\_Neu\_cra -----IAPERIWHLAVMPCFDKKLEASREELTDAV  
Narl\_Hom\_sap -----LTPDKIYHVTVMPCYDKKLEASRPDFFNQ-  
Narl\_Tri\_vag -----STNYVLYIGPCYDRKLEAARFEED---  
Narl\_Gia\_int -----SPLLVSIQPCQDRKLEQFRGAAV---  
Narl\_Ent\_his -----EIYHVS IQMCFDKKLEATKTYNNI--  
Narl\_Cry\_par SNSYRTNMNVKSTFTQNDNFVEQSDIFHVAIMPCHDKKLESTRSSLSLK-

Narl\_Tra\_hom -----DYVLSSKDIYEICSD--VRINFEVDNNDRIYDDVG  
Narl\_Enc\_cun -----FDFILTTRGFCKALDS--LGFRRPARAS-----  
Narl\_Enc\_int -----FDHVLTTRFRRVLDE--LEFELFLKAN-----  
Narl\_Nos\_cer -----YDFYKMILD--LGFLQHNFNIK-----GTCE  
Narl\_Sac\_cer -----DGIDCVITPREIVTMLQE--LNLDFKSFLT-----EDTS  
Narl\_Neu\_cra WAGDGKPGRGVRDVCVITSKEVLMLAAS--RGFDFFSLSA--SMPPQTP  
Narl\_Hom\_sap -----EHQTRDVCVLTTEGEVFRLLLEE--EGVSLPDLEP-----  
Narl\_Tri\_vag -----VDAVLTIAEINDHITE--PTEEIPVKFP-----  
Narl\_Gia\_int -----DVCLTAQEVHSFLAGTPQGSSPPA-----FCS  
Narl\_Ent\_his -----HVDCVLTTEIDSIIDW--NE-----  
Narl\_Cry\_par ---SSDKNSSCPEVDIVLATSEVGEIIKL--AGFNSSLDDVP-----E

Narl\_Tra\_hom VGNEGKGDNNGRDIHDDVGVNEGKGDNNGRDTYD-----  
 Narl\_Enc\_cun GKSLCS-----  
 Narl\_Enc\_int SWNHHE-----  
 Narl\_Nos\_cer KWEKCT-----IGY-----  
 Narl\_Sac\_cer LYGRLS-----  
 Narl\_Neu\_cra RFPDQL-----I-----  
 Narl\_Hom\_sap APLDSL-----C-----  
 Narl\_Tri\_vag ADTDLN-----  
 Narl\_Gia\_int SYTPSP-----  
 Narl\_Ent\_his ----PI-----  
 Narl\_Cry\_par APLDNL-----WLNQNFQITKKHNLSSLIT

Narl\_Tra\_hom -----DVGVGNEGKGDNNGRDIYDDVGVNGKDNNIYETCNGVHTN  
 Narl\_Enc\_cun -----MEE-----AETTQW-----  
 Narl\_Enc\_int -----IED-----MEVTQW-----  
 Narl\_Nos\_cer -----HYG-----YLEHILNKKNNYLTKNDSIKIFNSK---  
 Narl\_Sac\_cer -----PPG-----WDPRVH-----W---  
 Narl\_Neu\_cra -----HDFLFRPG-----HRQQ-----  
 Narl\_Hom\_sap -----SG---ASA-----EEPT-----  
 Narl\_Tri\_vag -----AIS-----QKLGQI-----  
 Narl\_Gia\_int -----TS-----  
 Narl\_Ent\_his -----NEITST-----  
 Narl\_Cry\_par ENYVSNQILNQFS-----WLIPSY-----

Narl\_Tra\_hom DKDDNNTNTHNDRLSPEQHSKNSSEHVLNEKEFLTGITPYLIK-----  
 Narl\_Enc\_cun -----NIGT-SSGGYAEFILG-----KHC-----  
 Narl\_Enc\_int -----NIGT-SSGGYAEFILS-----KHR-----  
 Narl\_Nos\_cer -----NEEVRLNGKRKL-----  
 Narl\_Sac\_cer -----AS-NLGG-TCGGYAYQYVT-----AVQRLHPGSQ-----  
 Narl\_Neu\_cra -----S-REAG-TSGGNMHFILR-----HLQAKNPGSQ-----  
 Narl\_Hom\_sap -----S-HRGG-GSGGYLEHVFR-----HAARELFGIHV-----  
 Narl\_Tri\_vag -----KDSL-NSDSIYQLIAE-----IEP-----  
 Narl\_Gia\_int -----FWQY-ALGPLLVLY-L-----RAKEWISDEGLSRL  
 Narl\_Ent\_his -----RMKG-FISSPAQYIAL-----MEQKKE-----  
 Narl\_Cry\_par -----FNS-NSGGFCEYIIR-----SAIKELAGDHI-----

Narl\_Tra\_hom -----LNLTIERIQTI-----NKSyrVLHFK-----NSSL  
 Narl\_Enc\_cun -----VVETREIRNGI-----KEH-LLDD-G-----R  
 Narl\_Enc\_int -----SVKKIKDRNGI-----REY-MVDD-G-----G  
 Narl\_Nos\_cer -----NINTVTLNKINIPeIDYKYKNGVFTYtQIKN-----NKKK  
 Narl\_Sac\_cer -----MIVLEGRNSDIV-----EYR-LLHD-D---RIIA  
 Narl\_Neu\_cra -----IQTVPGRNADV-----EYK-LIAEAG---EVMF  
 Narl\_Hom\_sap -----AEVtYKPLRNKDFQ-----EVT-LEKE-G---QVLL  
 Narl\_Tri\_vag -----TLNEEEINSLI-----SEL-PSRF-----DLEI  
 Narl\_Gia\_int VQRADGVDLHWTkIGNELFS-----CTI-ELSQ-NQSPYSCV  
 Narl\_Ent\_his -----PFKVTRNKDFL-----END-----G-----  
 Narl\_Cry\_par ---DNKVQLPFNKLN-DIL-----EAK-YIKN-N---VEL

Narl\_Tra\_hom TFAHITGLKNLLNFLND-----  
 Narl\_Enc\_cun TISQITGLENSINYFKSSKT-----  
 Narl\_Enc\_int IVSQITGLENSINYFKISKT-----  
 Narl\_Nos\_cer KYLRILGLEPFLNFIKESKH-----  
 Narl\_Sac\_cer AASELSGFRNIQNLVVRKLTSGSGSERKRNITALKRRTGPKANSREMAAA  
 Narl\_Neu\_cra KAARYYGFRNIQNLVVRKLP-----AKTSRMPGGKPFSGAKR  
 Narl\_Hom\_sap HFAMAYGFRNIQNLVQRLKR-----  
 Narl\_Tri\_vag STNSFDGETLNKRLTKTLDMM-----SSG-----  
 Narl\_Gia\_int IYKSTGYHNLQNLVRRRHA-----LCP-----  
 Narl\_Ent\_his -IAIANGFRNIQNVVRFVK-----  
 Narl\_Cry\_par NYCLAYGFRAIQSISRKLN-----QKNASQ-----NTQY

Narl\_Tra\_hom -----EEMRYNFVDIFL**CDDRC**FGGPGQIKNN-VQNDY-AHYFKLV----  
 Narl\_Enc\_cun -----KGPRHKMTEIFL**CKNGC**IGGPGQERVNDVEMDI-REY-DRN----  
 Narl\_Enc\_int -----KGPKYKMAEVFL**CKNSC**IGGPGQERINSVEVDS-AEY-NIY----  
 Narl\_Nos\_cer -----KELEYDVCEIYI**CNQCI**NGPGQLYTDNLYVNN-SEYIDID----  
 Narl\_Sac\_cer TAATADPYHSDYIEVNAC**PGACM**NGGGLLNGEQNSLKR-KQLVQTL----  
 Narl\_Neu\_cra PAGKASGLDYGVEVMAC**PGGCT**NGGGQIKVDDQVVVDRKGLAVKPGPQE  
 Narl\_Hom\_sap -----GRCPYHYVEVMAC**PSGCL**NGGGQLQAPDRPSRELLQHVERL---Y  
 Narl\_Tri\_vag --KKVPKPAPRLAQID**FC**KG**GLV**GGGQIRGNSPAQRRA-LIAATQ---  
 Narl\_Gia\_int -----NKSALYILD**LHAC**PY**GCY**GGA-CIAGDDRHPVSSV--ASAS--HA  
 Narl\_Ent\_his -----SKTKLQFIEVEAC**PGGC**ICGGGQIKCSPKEKDE-RVK-KMME-IL  
 Narl\_Cry\_par QQSVVNHVNYHLIEAMAC**PTGC**VSGGGQILSQNDQNDNSDL-NKL--RK

Narl\_Tra\_hom ---GLNTNEEV-----IVP  
 Narl\_Enc\_cun ---GREQPRIFYSS-----  
 Narl\_Enc\_int ---GKEQPEIYYSD-----  
 Narl\_Nos\_cer -----LGI  
 Narl\_Sac\_cer ---NKRHGEEELAMVD-----PLT--LGPKLEEEAARPLSL  
 Narl\_Neu\_cra QKEWQKEVDEAYFSG-----DESGSRAQDESLLDVVDGISPISHIRNVLTH  
 Narl\_Hom\_sap GMVRAEAPEDAPGVQ-----ELYTH  
 Narl\_Tri\_vag ---EVHTQNESTNIS-----FPTELYNE  
 Narl\_Gia\_int ATMSADKAVLSHILAADTCAGL-----LEGLVQAVDRITLQE  
 Narl\_Ent\_his EPKVVDEKNKSIYES-----  
 Narl\_Cry\_par NIKFIDEVQEALYKG-----INLN-KNQEV-----ILPDEIPIVNILYEY

Narl\_Tra\_hom QVLKDK-----KRIFENR-----KIYR-----SNFKVEW  
 Narl\_Enc\_cun -PGLLE-----KRVFREV-----KAKR-----VDLRVDW  
 Narl\_Enc\_int -PGLLE-----KRTFRPV-----SVKR-----IDFKVDW  
 Narl\_Nos\_cer DCKQLQ-----KRTYRKI-----ETKK-----VNFKIEW  
 Narl\_Sac\_cer EYVFAP-----VKQ-----AVEKDLVSVGSTW  
 Narl\_Neu\_cra WSTLTGIQLER--LAYTSYREVVS**DVGKEK**KMTDTERVVQLAGKIGGGW  
 Narl\_Hom\_sap WLQGTDSECAGR-LLHTQYHAV-----EKASTGLGIRW  
 Narl\_Tri\_vag L-----IKF-GYKTHYESL-----PQEEEKDQFAW  
 Narl\_Gia\_int TVIRTD-----GEVVSPE-----EIAARKGIQSGVRIQDLAW  
 Narl\_Ent\_his -IKDSI-----KLT**FIDR**-----KES**AQ**-----ENALHLNW  
 Narl\_Cry\_par LIHIDK-QIDRSSGLKLPFLRN-----DFVSI---NEVPTASSLKW

Abbreviations: Tra\_hom, *Trachipleistophora hominis*; Enc\_cun, *Encephalitozoon cuniculi*; Enc\_int, *Encephalitozoon intestinalis*; Nos\_cer, *Nosema ceranae*; Sac\_cer, *Saccharomyces cerevisiae*; Neu\_cra, *Neurospora crassa*; Hom\_sap, *Homo sapiens*; Tri\_vag, *Trichomonas vaginalis*; Gia\_int, *Giardia intestinalis*; Ent\_his, *Entamoeba histolytica*; Cry\_par, *Crystosporidium parvum*.

Nar1 proteins are related to Fe-only hydrogenases<sup>40</sup> and contain two-conserved cysteine motifs. One is located at the N-terminus and the second is distributed between the central part of the protein and its C-terminus, the cysteine residues forming these motifs are coloured in red and blue, respectively. In yeast, each cysteine motif coordinates a [4Fe-4S] cluster and both are essential for the assembly of cytosolic Fe/S proteins<sup>41</sup>. It has been shown that the C-terminal Fe/S cluster is stably bound to the protein and its assembly depends on the Fe/S cluster from the N-terminal cysteine motif<sup>42</sup>. A conserved C-terminal tryptophan characteristic of the Nar1 protein family is highlighted in yellow.



## i. Fe/S protein Dre2

Dre2\_Tra\_hom MATE-----N-----  
 Dre2\_Enc\_cun MEDK-----  
 Dre2\_Enc\_int MEDK-----  
 Dre2\_Ent\_bie MTSS-----D-----  
 Dre2\_Sac\_cer MSQYKTGLLL-IHPA-----VTTTP---  
 Dre2\_Neu\_cra MSPITLDLTSDFNPA-NTTGAGSSSSQP-----RLLLVAPPSVASHE---  
 Dre2\_Hom\_sap MADFGISAGQ-FVAVVWDKSSPVEALKGLVDKQLQALTGNEGRVSV-----  
 Dre2\_Cry\_par MTQLIITHQ-----SDSKLEES-----EVFLSELNRIKKEEDKF

Dre2\_Tra\_hom --DDF---KKLLEG-----  
 Dre2\_Enc\_cun --EEL---RKLLRS-----  
 Dre2\_Enc\_int --EEL---RKLLRS-----  
 Dre2\_Ent\_bie --EEL---KELLKQ-----  
 Dre2\_Sac\_cer --ELVENTKAQAASKVKVFVDQFLINKLNDGSITLENAKYETVHYLTPEA  
 Dre2\_Neu\_cra --ERI---SALFSTYPRDITDLHMLDRLAAGLVTLPTSTY-----  
 Dre2\_Hom\_sap --ENI---KQLLQSAHKESSFDIILSGLVPGSTTLHSA-----  
 Dre2\_Cry\_par GKFSS---LSDLRAIVKKGEFRIVSIYLSGSGSILGEIF-----

Dre2\_Tra\_hom -----  
 Dre2\_Enc\_cun -----  
 Dre2\_Enc\_int -----  
 Dre2\_Ent\_bie -----  
 Dre2\_Sac\_cer QTDIKFPKKLISVLADSLKPNGSLIGLSDIYKVDALINGFEIINEPDYCW  
 Dre2\_Neu\_cra -----DLILVLTPDGRHAEASALLSNRAVWSLLVPALKAGGK  
 Dre2\_Hom\_sap -----EILAEIARILRPGGCLFLKEPVETAVDNNKVKTASKLCSAL  
 Dre2\_Cry\_par -----TFEFLKEFYGVLDVDFGVLKVNI---LALDSIDKVKAFER---NL

Dre2\_Tra\_hom -----  
 Dre2\_Enc\_cun -----  
 Dre2\_Enc\_int -----  
 Dre2\_Ent\_bie -----  
 Dre2\_Sac\_cer IKMDSKLNQ-----TVSIPLKKKKTNNTKLQSGSKLPT--FK  
 Dre2\_Neu\_cra LRSEDGTLGRDITTPPEARE--AVLAGL-----VAGADGFTKPDYA  
 Dre2\_Hom\_sap TLSGLVEVKELQREPLTPPEEVQSVREHLGHESDNLFFVQITG--KKPNFE  
 Dre2\_Cry\_par LFSGFIKVKKLGKDGLEN-----SSDSDF-----E

Dre2\_Tra\_hom -----ALKVKNR--R-----TEE-----  
 Dre2\_Enc\_cun -----MMRKSTDP--RT-----KM-----  
 Dre2\_Enc\_int -----TIRKNTDP--RV-----KI-----  
 Dre2\_Ent\_bie -----ATTYKQDP--R-----  
 Dre2\_Sac\_cer KASSSTSNLPSFKKADHSRQPIVKE TDSFKPPSFKMTTEPKVYRVVDDL-  
 Dre2\_Neu\_cra EEEAVPLRFGLKRKTNP--NPVVAP-IQPVAQVVTAAPAGVGFVTLDL-  
 Dre2\_Hom\_sap VGSSRQLKLSITKKSSP--SVKPAVDPAAAAKL-----WTLS-  
 Dre2\_Cry\_par IVIKAKEP--SWKPEE-----

Dre2\_Tra\_hom -----D-----EKDF--LD-EDA-----  
 Dre2\_Enc\_cun -----Q-----DEYL--TD-EDK--AIQ-----  
 Dre2\_Enc\_int -----S-----DEYL--TD-EDK--AET-----  
 Dre2\_Ent\_bie -----H-----RIPM--VDRPSK-----  
 Dre2\_Sac\_cer ----IEDSDDDDFSSDSSKAQYFDQVDTSDDS--IE-EEE-LIDEDGSGK  
 Dre2\_Neu\_cra NDDLDLGDGDD-----DDD--ID-EDT-LLTEADLRR  
 Dre2\_Hom\_sap ----ANDMEDD-----SMDL--ID-SDE-LLDPEDLKK  
 Dre2\_Cry\_par -----G-----KVLVDDID-LEGSVPDIKNYVP

```

Dre2_Tra_hom    ---SE--SVSNSRRVQKKKRAENCVCGRAEGKKKLSREELKKM-----
Dre2_Enc_cun    -----RSERPPAKKRA CKDCTCGLKEEQEV-----
Dre2_Enc_int    -----KTLRTPAKKRA CKDCTCGLKEKQEV-----
Dre2_Ent_bie    ---I---LTQSNKCRENKARKCSNCTCNKNTNTNNT-----
Dre2_Sac_cer    S---MITMITG GSKTKKKKAKDCTCGMKEQEENEINDI-RSQQDKV--
Dre2_Neu_cra    P---IQQPPEQ QPKPGKKRRA CKDCTCGLAERLEAEDKAR-RDKADQALN
Dre2_Hom_sap    PD PASLRAASGEG--KKRKA CKNCTCGLAEELEKEKS---REQ-----
Dre2_Cry_par    ---LGQ---GKESCKSKERA CNNCNCGRADLEKEIGVEAARKV-----

```

---

```

Dre2_Tra_hom    ----SREEV-----KLANAGCGGCKMGDAFRCGDCPFYGLPSFEEGD
Dre2_Enc_cun    -----RTRSACGNCYKGDAFRCSGCP SLGLPPYEPGD
Dre2_Enc_int    -----EVR SACGNCYKGDAFRCSGCP SLGLPPYEPGE
Dre2_Ent_bie    -----IYKSKCGSCHLGD PFRCS SCPYKGLPPFNEGD
Dre2_Sac_cer    -VKFTEDELTEIDFTIDGKKVGGCGSCSLGDAFRCSGCPYLGLPAFKPGQ
Dre2_Neu_cra    TLKLS ELDLELDLTV-PGKTGSCGSCALGDAFRCSGCPYLGLPPFKVGE
Dre2_Hom_sap    -----M-----SSQPKSACGNCYLGDAFRCSGCPYLGM PAFKPGE
Dre2_Cry_par    ----YQEKVE-----TGTARSSCGNCGYLGDAFRCSGCPYKGM PAFKPGE

```

---

```

Dre2_Tra_hom    EVFFD-----
Dre2_Enc_cun    VVSFMDL-----SNE-----FQ
Dre2_Enc_int    VVSFSTDL-----DEG-----LQ
Dre2_Ent_bie    EINF D-----
Dre2_Sac_cer    PINLDSIS-----D-----
Dre2_Neu_cra    EVSILNNV-----P-----
Dre2_Hom_sap    KVLLSDSN-----
Dre2_Cry_par    KVSLANAEGDANDHTVDMNLIHEEKVDLITTTFDDDGSGVNNVQSKGGVL

```

```

Dre2_Tra_hom    ----
Dre2_Enc_cun    GEDA
Dre2_Enc_int    GQDG
Dre2_Ent_bie    --EL
Dre2_Sac_cer    --DL
Dre2_Neu_cra    --QL
Dre2_Hom_sap    LHDA
Dre2_Cry_par    KLNI

```

Abbreviations: Tra\_hom, *Trachipleistophora hominis*; Enc\_cun, *Encephalitozoon cuniculi*; Enc\_int, *Encephalitozoon intestinalis*; Ent\_bie, *Enterocytozoon bieneusi*; Sac\_cer, *Saccharomyces cerevisiae*; Neu\_cra, *Neurospora crassa*; Hom\_sap, *Homo sapiens*; Cry\_par, *Crystosporidium parvum*.

Dre2 is an essential protein in *Saccharomyces cerevisiae* and is conserved among animal species and other eukaryotes<sup>43</sup>. The human protein is called CIAPIN1 or anamorsin. Dre2 homologues have a conserved C-terminal domain (underlined with blue bar) sometimes called a CIAPIN1 motif, which is present in the microsporidian sequences. In yeast the amino acids 173-348 within the CIAPIN1 motif interact with the FMN- and FAD-binding domains of Tah18. The protein contains an N-terminal [2Fe-2S] and a C-terminal [4Fe-4S] cluster within the CIAPIN1 motif. The coordinating cysteine residues are marked in red<sup>44</sup>. In yeast, Tah18 transfers electrons to the [2Fe-2S] cluster of Dre2<sup>29</sup>. In human and yeast the C-terminus of the proteins are connected to an N-terminal S-adenosylmethionine (SAM) methyltransferase-like domain which is not known to bind SAM<sup>45</sup>. The SAM-like domain is not present

in the microsporidian Dre2-like proteins and was not detected using CDD at the NCBI<sup>16</sup>. Notably, residues 1-172 of this region are known to be important for Dre2 function in Fe/S protein biogenesis, yet the region is not essential for yeast cell viability<sup>43-45</sup>.

**In yellow:** Acidic and serine (E, D and S)-rich patch identified in human and yeast Dre2<sup>43</sup>. The E, D and S residues in this region of microsporidian proteins were also labelled in **yellow** for comparison.

## j. Diflavin-oxidoreductase Tah18

```

Tah18_Tra_hom -----MSVQIPIVYGTQSGNSLHVS
Tah18_Enc_cun -----MIPILYGSQTGTAIYVS
Tah18_Enc_int -----MIPILYGSQTGTSIYVS
Tah18_Nos_cer -----MIILYGSQTGNSIHIA
Tah18_Sac_cer -----MSSSKKIVILYGSSETGNAHDFA
Tah18_Neu_cra -----MGEPVLAASVAKSTTMEGRNLILYGSSETGNSEEIA
Tah18_Hom_sap -----MPSPQLLVLEFGSQTGTAQDVS
Tah18_Cry_par MPFFYINNALNYLSICNISIGFILVLKLAQLSSEYIENNVPSNFSIFYSTETGNSRKIS

Tah18_Tra_hom QLIRSKLTH-YTTHIVP-----VDEFLENFLNCNTFIFVCSTYGN
Tah18_Enc_cun NLIARAIMHGYDAKTIYNLDAFLYSPGQKDACLVMEMDLLDIEKILDIDLIIFVCSTHGD
Tah18_Enc_int NLIERALLYGYDPKTIYNLDCFFNSRDQENLSSVMEMDLFDIEKILDIDFIIFVCSTHGD
Tah18_Nos_cer KLIQNVILYGYNKDLIYNVDKELLPTD-----FTLDMSDFEKILDIDMIIFVCSTHGN
Tah18_Sac_cer TILSHRLHRWHFSHTFCS-----IGDYDPQDILKCRYLFIICSTTGQ
Tah18_Neu_cra MELAKMAERLHFNTVVG-----EMDDFKLTDLLRYSLAIFVTSTTGQ
Tah18_Hom_sap ERLGREARRRRLGCRVQ-----ALDSYPVVNLINEPLVIFVCATTGQ
Tah18_Cry_par ELFKLLDEISIEANVREIN-----SILEENMYLNSNNSVFVFVVSTCGN

Tah18_Tra_hom GDFPFAA-----QYFYNCLVSESVPNDFLKKLVRACPTIFLKSCNIAVFGLGDSSYA
Tah18_Enc_cun GAEPFNM-----TKFWSFLSRDDLPSTILSHLSFAVFGLGDSSYE
Tah18_Enc_int GTEPFNM-----TKFWSFLSNSDLPGNLLSHLNFAVFGLGDSSYE
Tah18_Nos_cer GSEPFNM-----TKFWKFLRKKNLPTNFLQHNFAVFGLGDSSYK
Tah18_Sac_cer GELPRNVNALKGERPVTFWSFLKRKNLPSNLLNHIQTAMLGLGDSSYP
Tah18_Neu_cra GDMPKNT-----TTLWKSLRRTKLNNTNCLAPVKFSIFGLGDSSYP
Tah18_Hom_sap GDPPDNM-----KNFWRFIFRKNLPST-ALCQMDFAVLGLGDSSYA
Tah18_Cry_par GSFPASS-----RKFIRYLSKMIKSGNEIFLGIKYTIIGLGSSLYE

Tah18_Tra_hom KFNFASKKLFKVFS-KLGANLFVERGNGNVQDDEG-----YYTALFPWIEKLITNLQ
Tah18_Enc_cun KFNYCSKRLFNRLR-MLGARPVIRRGSGDSQDREG-----FLSDFRPWLLELTAYLR
Tah18_Enc_int KFNYCSKKLFNRLR-MLGAKPVVRRGDGNAQDKEG-----FLSDLRPWLLELMAHFD
Tah18_Nos_cer SFNFCSKKLYNCLL-KHGAKPLIRKGNDSQDKEG-----FMGEFKTWIKDLYYILP
Tah18_Sac_cer KFNYGIRKLHQRIVTQLGANELFDRLEADDQAMAGSNKGTGLGIESVYFEYEKKVLSFLL
Tah18_Neu_cra KFNWAARKLRVRL-QLGASEFFRPGEADERHENG-----LDSIYLPWYQELRESLL
Tah18_Hom_sap KFNFVAKKLHRRL-QLGSSALLPVCLGDDQHELG-----PDAAVDPWLRDLWDRVL
Tah18_Cry_par YSENSAALKLDKLISSLKGEKYCEIALLDEVNGNE-----IDFKTWWNNTFLNRLGISD

Tah18_Tra_hom S-LNIKGAELIIKQKR-----
Tah18_Enc_cun TYISRPCTDFISTQPK-----
Tah18_Enc_int P-LKIKHIDILSLKPE-----
Tah18_Nos_cer HYKLQNAKNFASCKND-----
Tah18_Sac_cer SKYPNRKVNGQIIKREELDPEVYLEPASYLQLS-----
Tah18_Neu_cra SQFPLPKGIEPIPDDAPLPPKYNIRLVPSTGSLKDKITNGEGHVSQVEDNEQLAARFERM
Tah18_Hom_sap GLYPPPPGLTEIPPGVPLPSKFTLLFLQEAPS-----T
Tah18_Cry_par SKEHLNKHFSIAVTRKKDEFVCKLRSINEISLYN-----

Tah18_Tra_hom -----LYDATIISKNMLTPCDHFQEIEVGLSVE
Tah18_Enc_cun -----RYVSRLVEKRVLTPDDHFQKIVEFVDIP
Tah18_Enc_int -----KYTSRLVGKRLLTPEGHFQKIIELVFEIP
Tah18_Nos_cer -----LYSASINDIKILTPYNIYPILEIKFDI-
Tah18_Sac_cer -----DEHANEKFTSTKVIFEGDESLKVGRVNINKRITSEGHFQDVRQFKFSNV
Tah18_Neu_cra STESEATEAPGQKGTDVPDFPPAKLLPIPGSFTAQVVCNKRVTPEDHWQDVRHIEFELR
Tah18_Hom_sap GSEGQRVAHPGSQE-----PPSESKP-----FLAPMISNQRVTGPSHFQDVRLIEFDIL
Tah18_Cry_par -----HSLSGNCHVSEIYFKLIEFCPINRELLCETKTIDGIERQIFNLKLELP

```

Tah18\_Tra\_hom NYDDFE-----PGDTIRIYPSN--YNWREFCD-YI GNVDDDEDHVR-----N  
 Tah18\_Enc\_cun DYKEFF-----PGDCLSLPEN--YNYREFMS-YNGIGDGLDGVSSVWM-----LQN  
 Tah18\_Enc\_int EYKEFS-----PGDCLSFCPEN--YNYKEFMK-YNGM-EEDVDGISSSLM-----MKH  
 Tah18\_Nos\_cer DIENFE-----IGDCLAVYPEN--YNYEEFVR-YNNIKDNTLVKY-----IKK  
 Tah18\_Sac\_cer DKIQEN---YEPGDTVTIYPCNTDEEDVSRFLANQSHWLEIADKPLNFTSGVPNDLKDGGGL  
 Tah18\_Neu\_cra SPGRNGAMSFAG-QTLLIYPKNYPKDVQKLID-LMGWSEVAEQRIEIDWVKGTRPRDYHF  
 Tah18\_Hom\_sap GSG-----ISFAAGDVVLIQPSNSAAHVQRFCQ-VLGLD--PDQLFMLQPREPDVSSPTRL  
 Tah18\_Cry\_par DKVQYK-----TFDIIDILPPNLDENITFFSSKVLGINSIEDLKNITVEFVPINNMTRNI  
  
 Tah18\_Tra\_hom TMDYN---FVPPFRIFAEIVKYLEDEPLNDYVFKNPERKEAVI-----RRIRE  
 Tah18\_Enc\_cun VVDFN---SQPHQPPFFALRHFLGQK-----NRTEEEIL-----LKIEE  
 Tah18\_Enc\_int SIDFN---SQPHQPPFFALRYFLDRK-----GGIEDEVL-----LKIEE  
 Tah18\_Nos\_cer YCDFN---SIPQIYFFLQLSLITDT-----IAEEYR-----EKCKE  
 Tah18\_Sac\_cer VRPMT---LRNLLKYHCFMSIPRTSFFLKIWTFATDVTKMERGQEQQLNDQREKLRQFA  
 Tah18\_Neu\_cra LKDAT---IRDVLTHNFDISAVPKRTFLEFMAYHTTNPLEKER-----LHELT  
 Tah18\_Hom\_sap PQPCS---MRHLVSHYLDIASVPRRSFFELLACLSSLHELEREK-----LLEFS  
 Tah18\_Cry\_par SVPPFPNNRSLMHILKYYFDLMTLPPHSVMLQFVPLYNSIEGELISNE-----SFFNE  
  
 Tah18\_Tra\_hom MSTDYEL-YFDYVVRKPKRTFFEVLQDFAL-----KLPFSFLKKIVPNIQPRYFTLTKRE  
 Tah18\_Enc\_cun IAQDYDL-YHDYVIRARRTVFEVLKDLRI-----KVDIGFLKSFVPAMYPRFFSVTKKK  
 Tah18\_Enc\_int IAQDYDL-YYEYIVKPKRTIFEVLQELRV-----KVDARFLKKFVPTIYPRFFSVTKKK  
 Tah18\_Nos\_cer IYLYDL-YYDYILLPKRTIFEVLKDFKI-----KLTSNFMKYIPVINPRYFTLTKKD  
 Tah18\_Sac\_cer TDQDMQD-LYDYCNRRRSILEVLEDFIS--V--KLPWKYVLDYLPPIKPRYYSISSGP  
 Tah18\_Neu\_cra QRGDSDE-FYDYTSRPRRTILEVLEDFPG--V--KIPYTRLLEFP-IIRPREFSLCNGG  
 Tah18\_Hom\_sap SAQGQEE-LFEYCNRRPRRTILEVLCDFPHTAA--AIPPDYLLDLIPVIRPRAFSIASS-  
 Tah18\_Cry\_par NKDSYEFSFHLFINRFMKSLIPIPIEKFKFTGIRQYPRSYSISSSSLASPSMIDLTIST  
  
 Tah18\_Tra\_hom -----SSYYLTIALVEYQNSIKAKRKGKLCSQYLREINVK-  
 Tah18\_Enc\_cun -----GLYHITVAIVRYTTFLSEPRRGVCSEYLMSSLN-  
 Tah18\_Enc\_int -----GLYHVTVAVVNYKTILSQPRRGVCSEYLMGLSN-  
 Tah18\_Nos\_cer -----FCYFVTVSLVSFKTSLKEERKGLCSEYLLKLLTKG-  
 Tah18\_Sac\_cer GD-----PNIELTVAIVKYKTILRKIRRGICTNYIARLQEG-  
 Tah18\_Neu\_cra DPAVNAKDLVISNEQDTTTTTTDDVYKFEILAAALVHYRTIIRKPRQGLCSRYLRHLPVG-  
 Tah18\_Hom\_sap -----LLILVAVVQFQTRLKEPRRGLCSSWLASLDPGQ  
 Tah18\_Cry\_par CIKG-----QISAPLNEIISEGANKKNSKKIIKGLCSSFLFEFDLN-  
  
 Tah18\_Tra\_hom --ESIKVGMVKSHLFYDSAN-----LLFICTGTGITLPRAFWN----FFTD----KNI  
 Tah18\_Enc\_cun --DVIKIGVERSPLYFDSK-----LLFVCTGTGITLPRACVN----EFKD----KEI  
 Tah18\_Enc\_int --DKVPIGIGRSNLYFGSNK-----LLFICTGTGITLPRACIN----EFKD----KEI  
 Tah18\_Nos\_cer --STIHVNIVQNRLNFGSKK-----ILFMCTGTGITLPRAFVN----YSDLNFFKVKV  
 Tah18\_Sac\_cer --EQIRYKLQNNHIKKEFLN---KPMILVGPVGLAPLLSVVK-----AEISKDI  
 Tah18\_Neu\_cra --TTVQIGIKPPSSPFAMDDPSFYRPLIGVATGTGIAPFRALLQDRCLVQEDQOKLGPT  
 Tah18\_Hom\_sap GPVRVPLWVRPGSLAFPETP---DTPVIMVGPGTGVAPFRAAIQERVAQQTG-----N  
 Tah18\_Cry\_par --LPVLGMIRSSSLNIDNVTs-----SALMFSHGSGIAPIRALLHERKYLINEKKIKPA  
  
 Tah18\_Tra\_hom VVFYGYRHDDKDRLYVEEMKKNKNVQVYAPSRMG-----  
 Tah18\_Enc\_cun VIFYGFYRKNKDFLYPDEWT-GRNVRMFTAASRD-----  
 Tah18\_Enc\_int VVFYGFYRDRDFLYSDEWN-CKNVRMLTAASRD-----  
 Tah18\_Nos\_cer ILLYGFRFRDVFYLYKEEFE-NKGIEIYPAVSRE-----  
 Tah18\_Sac\_cer KLLFGCRYKDKDYIYKDMLEDWFRKGIKIALHSSFSRDEENSP-----  
 Tah18\_Neu\_cra LLFFGCRNAAADFHFQAEWGTVPN---LTVYPAFSRDNDSSSTEEETKLALQRAAGIYD  
 Tah18\_Hom\_sap FLFFGCRWRDQDFYWEAEWQELEKRDCLTLIPAFSREQEQ-----  
 Tah18\_Cry\_par YLFYGCRTEN-EIYKDELKDFKRIGALTEVFFALSKT-----

```

Tah18_Tra_hom  -EELYVQEIFYKYF-----HDSIDQYLIYVSGR---TRLNKEVRQMFVKKYG-----
Tah18_Enc_cun  -DKVYVQDVFRKSP-----VEDVDQYLIFVSGN---SRLNREVKKLLEDVYG-----
Tah18_Enc_int  -DKMYVQDVFNRP-----IEDIDEYLI FVSGN---SRLNKEVRKLFQKLYG-----
Tah18_Nos_cer  -DNKYIQDIYKTIKG-----LENIDDWLI FVSGN---SRLNNIIEKMLLDIYK-----
Tah18_Sac_cer  -GVKYVQDYLWRLGEEITNLVVNKDAVFFLCGSS---GKMPIQVRLTFIEMLKKGWGNFSD
Tah18_Neu_cra  AGKNYVQNQIRQHAAEVGELL-RQNPIIVVCGNS---GRMPKSVREALEDAAVGSGVVAD
Tah18_Hom_sap  --KVYVQHRLRELGLSLWELLDROGAYFYLAGNA---KSMPADVSEALMSIFQEEGGLCS
Tah18_Cry_par  -QKKYVKDIIIPFYKHIILKVVDQNDIIYICGKKEFVSGIKNEVASIISNNRS-----

```

```

Tah18_Tra_hom  -----AELYFQAETW-
Tah18_Enc_cun  -----KRIVFQSETW-
Tah18_Enc_int  -----RTIAFQSETW-
Tah18_Nos_cer  -----KKIYFQAETW-
Tah18_Sac_cer  EETAKKYLKEMEKSDRYIQETW-
Tah18_Neu_cra  KEEAKGWFD RK-ENCVYWQETW-
Tah18_Hom_sap  PDAAAYLARLQ-QTRRFQTETWA
Tah18_Cry_par  ----RNIIKKMFVEGRIFIESWN

```

Abbreviations: Tra\_hom, *Trachipleistophora hominis*; Enc\_cun, *Encephalitozoon cuniculi*; Enc\_int, *Encephalitozoon intestinalis*; Nos\_cer, *Nosema ceranae*; Sac\_cer, *Saccharomyces cerevisiae*; Neu\_cra, *Neurospora crassa*; Hom\_sap, *Homo sapiens*; Cry\_par, *Crystosporidium parvum*.

Tah18 is a member of the diflavin oxidoreductase family containing FMN and FAD cofactors that are reduced by cytosolic NADPH. The FMN binding domain of diflavin reductase proteins is located at the N-terminus while the FAD/NADH binding domain is located in the C-terminal domain<sup>46</sup>. The FMN and FAD domains interact with Dre2<sup>45</sup>. *In vivo* Tah18 interacts with the Fe/S CIA component Dre2 and transfers electrons to the [2Fe-2S] cluster of Dre2<sup>29</sup>. Motifs similar to other diflavin reductases: Residues involved in FMN binding are indicated in **bold**. Residues that make hydrogen bonds with phosphate groups of FMN are labelled in **red**. The tyrosine that stabilizes the FMN prosthetic group is labelled in **green**<sup>47</sup>. The FMN, FAD and NAD binding domains identified using SMART(<http://smart.embl-heidelberg.de>) are highlighted in **pink** (PF00258), **yellow** (PF00667) and **light blue** (PF00175) respectively.

**Supplementary Figure 2. Phylogenetic trees for mitosomal and cytosolic Fe/S protein biogenesis components and for cytosolic and nuclear Fe/S proteins.**

Components of the mitosomal ISC pathway have originated from the mitochondrial endosymbiont. The CIA pathway appears largely bacterial in character, and not archaeal as might be expected given that the host for the mitochondrial endosymbiosis is now thought to have descended from an Archaeon. By contrast, important nuclear and cytosolic Fe/S proteins do appear to have originated from an Archaeon. Monophyly of eukaryotic sequences, including those from microsporidians, is generally observed, suggesting that there is strong negative selection against gene replacement and reflecting the important roles that Fe/S proteins play in eukaryotic physiology.

# 1 Mitochondrial / mitosomal Fe/S cluster (ISC) assembly components

## Mitochondrial Hsp70 (Ssc1 in yeast)

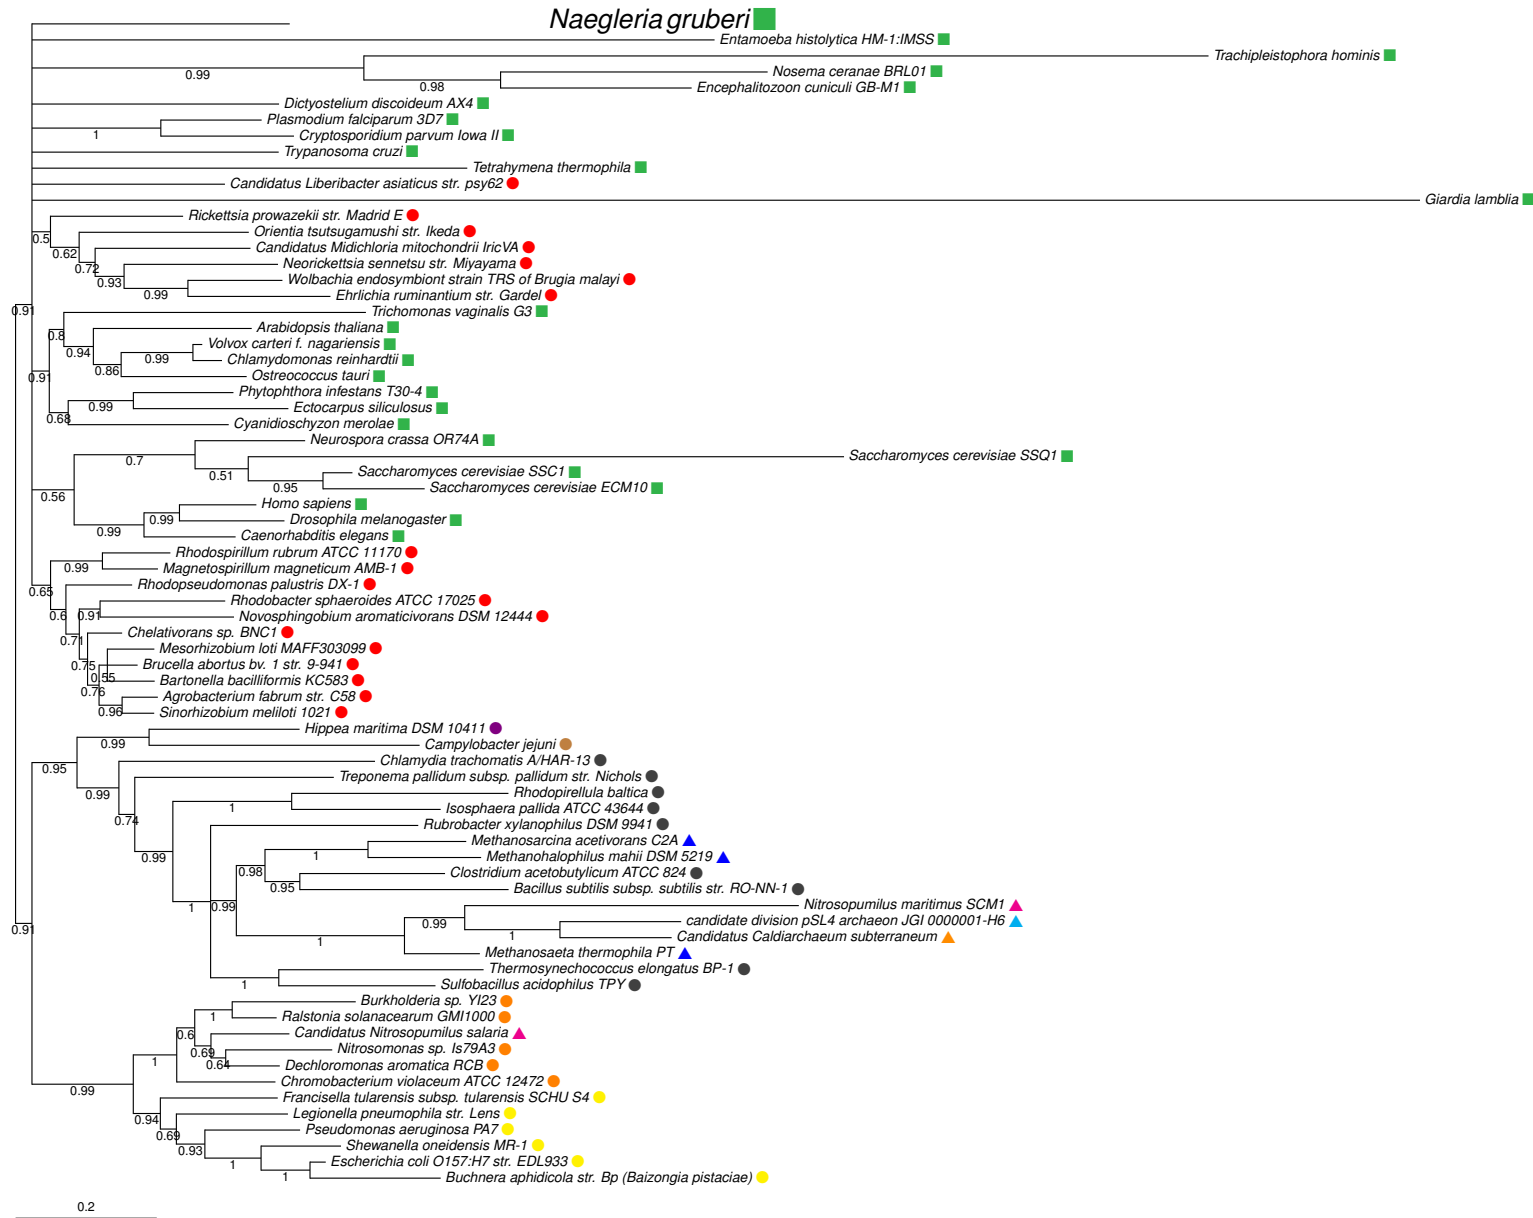

### For all trees:

- Alphaproteobacteria ●
- Betaproteobacteria ●
- Gammaproteobacteria ●
- Deltaproteobacteria ●
- Epsilonproteobacteria ●
- Other bacterial groups ●
- Euryarchaeota ▲
- Thaumarchaeota ▲
- Aigarchaeota ▲
- Crenarchaeota ▲
- Korarchaeota ▲
- Eukaryota ■



Jac1

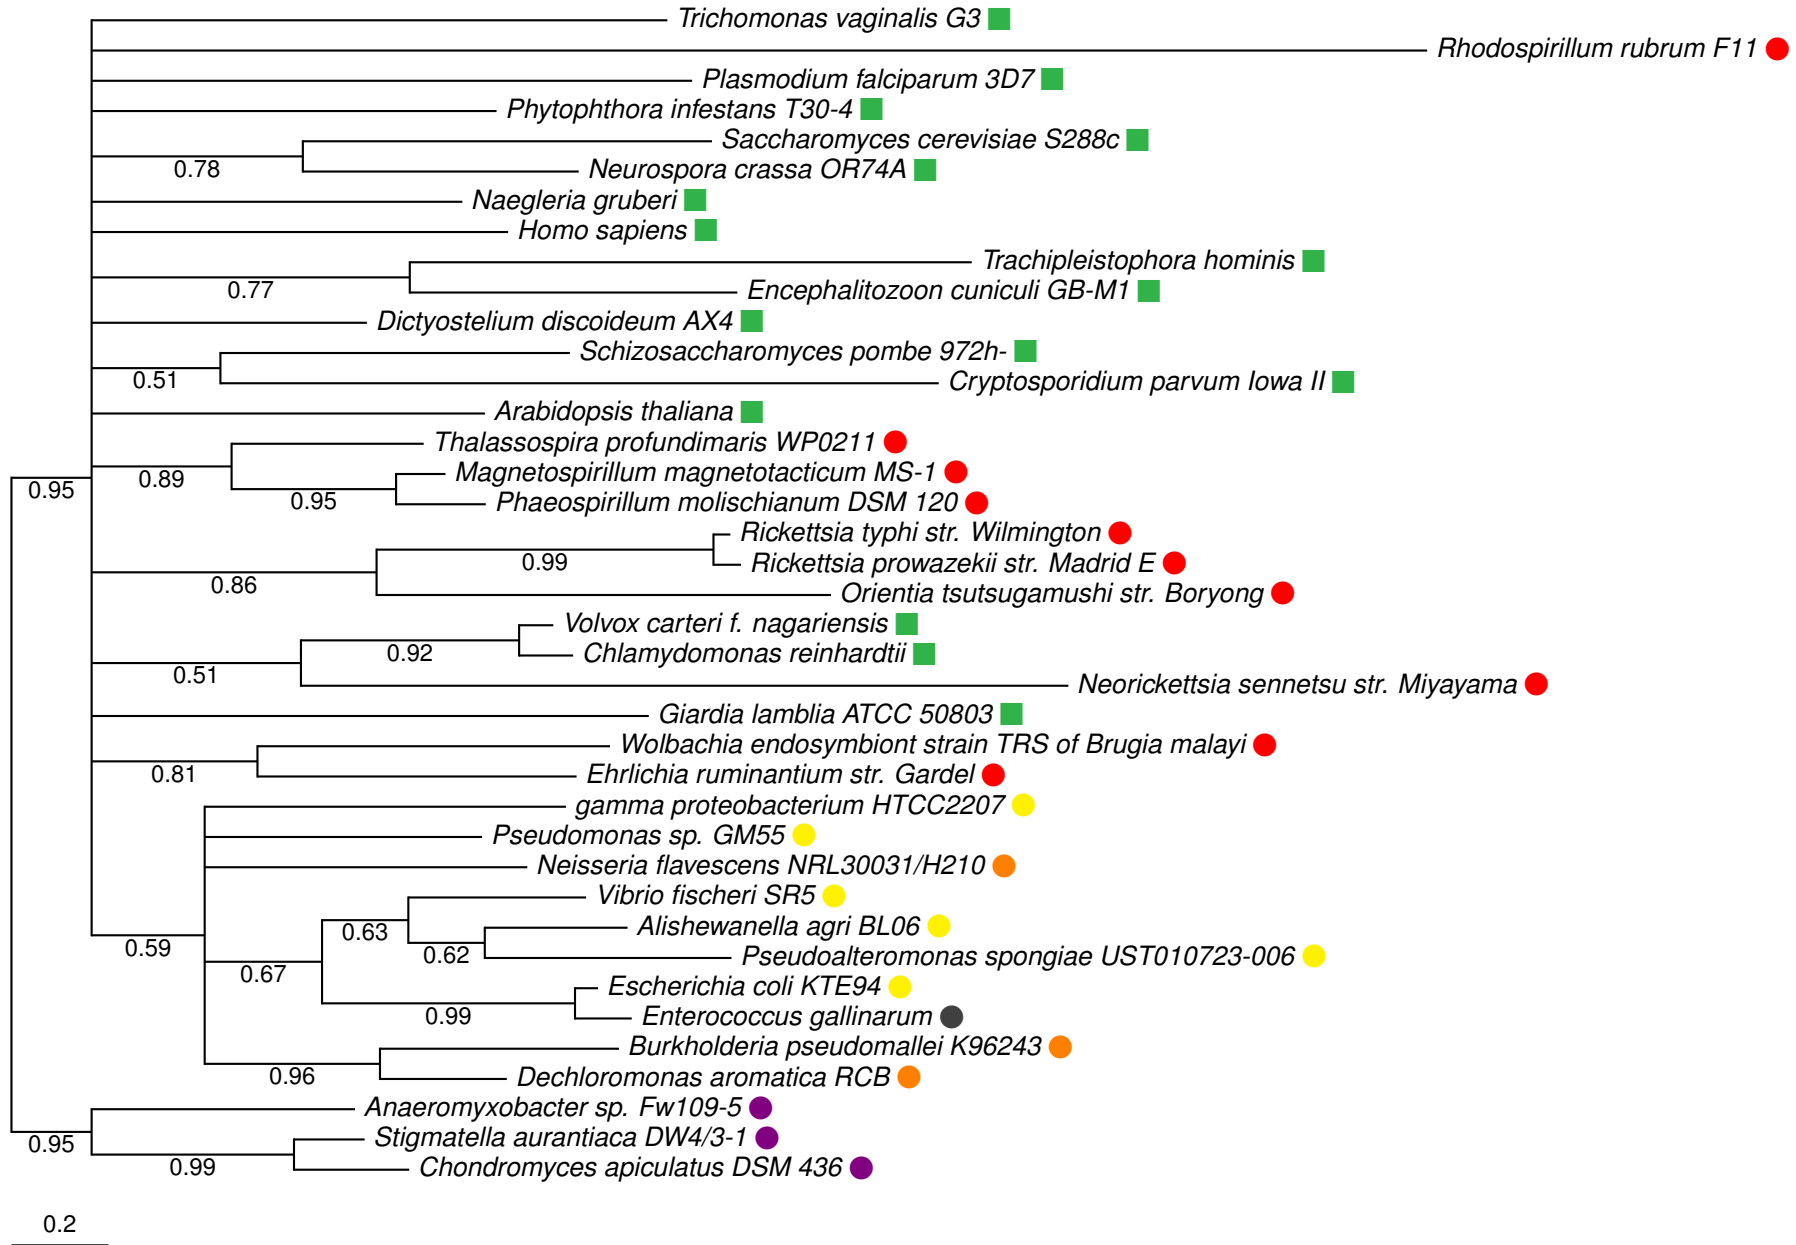

# Arh1

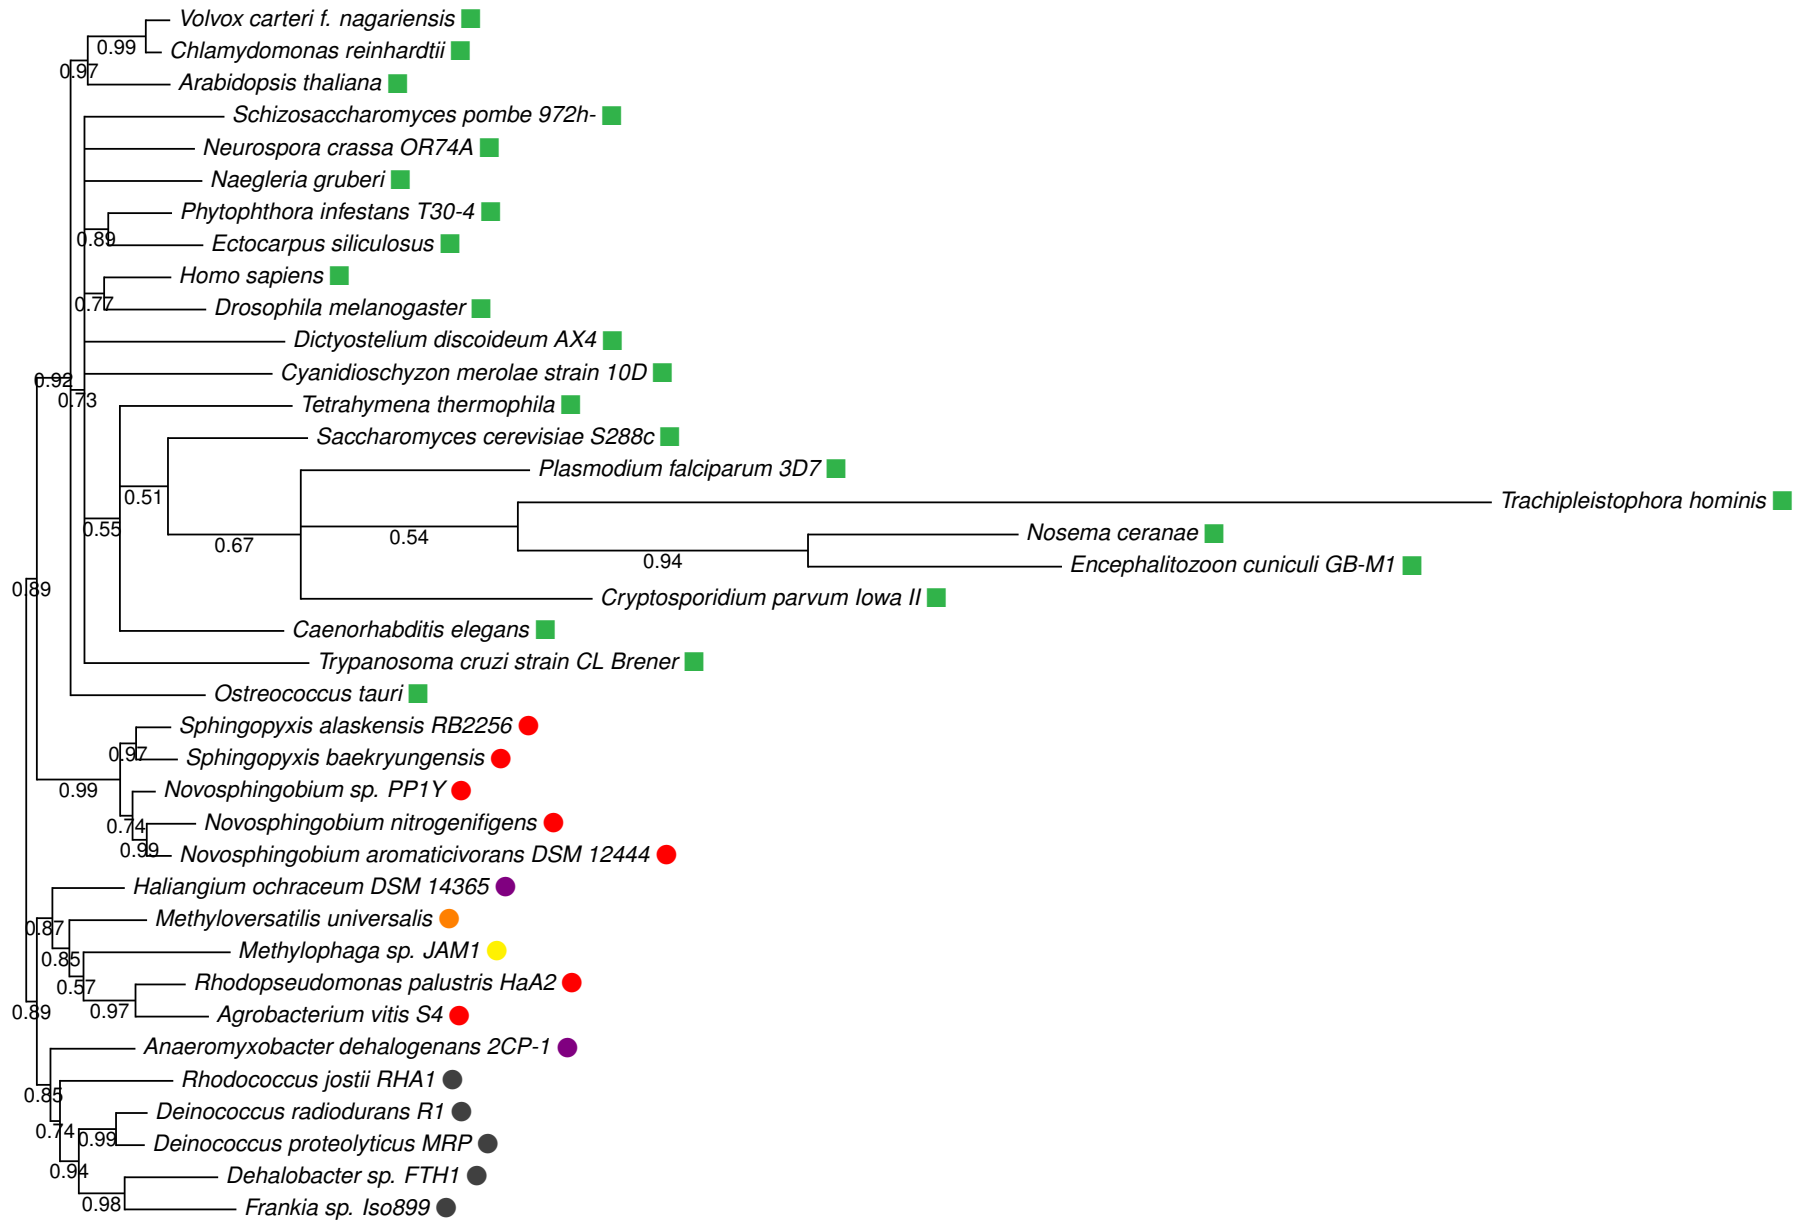

# Yah1

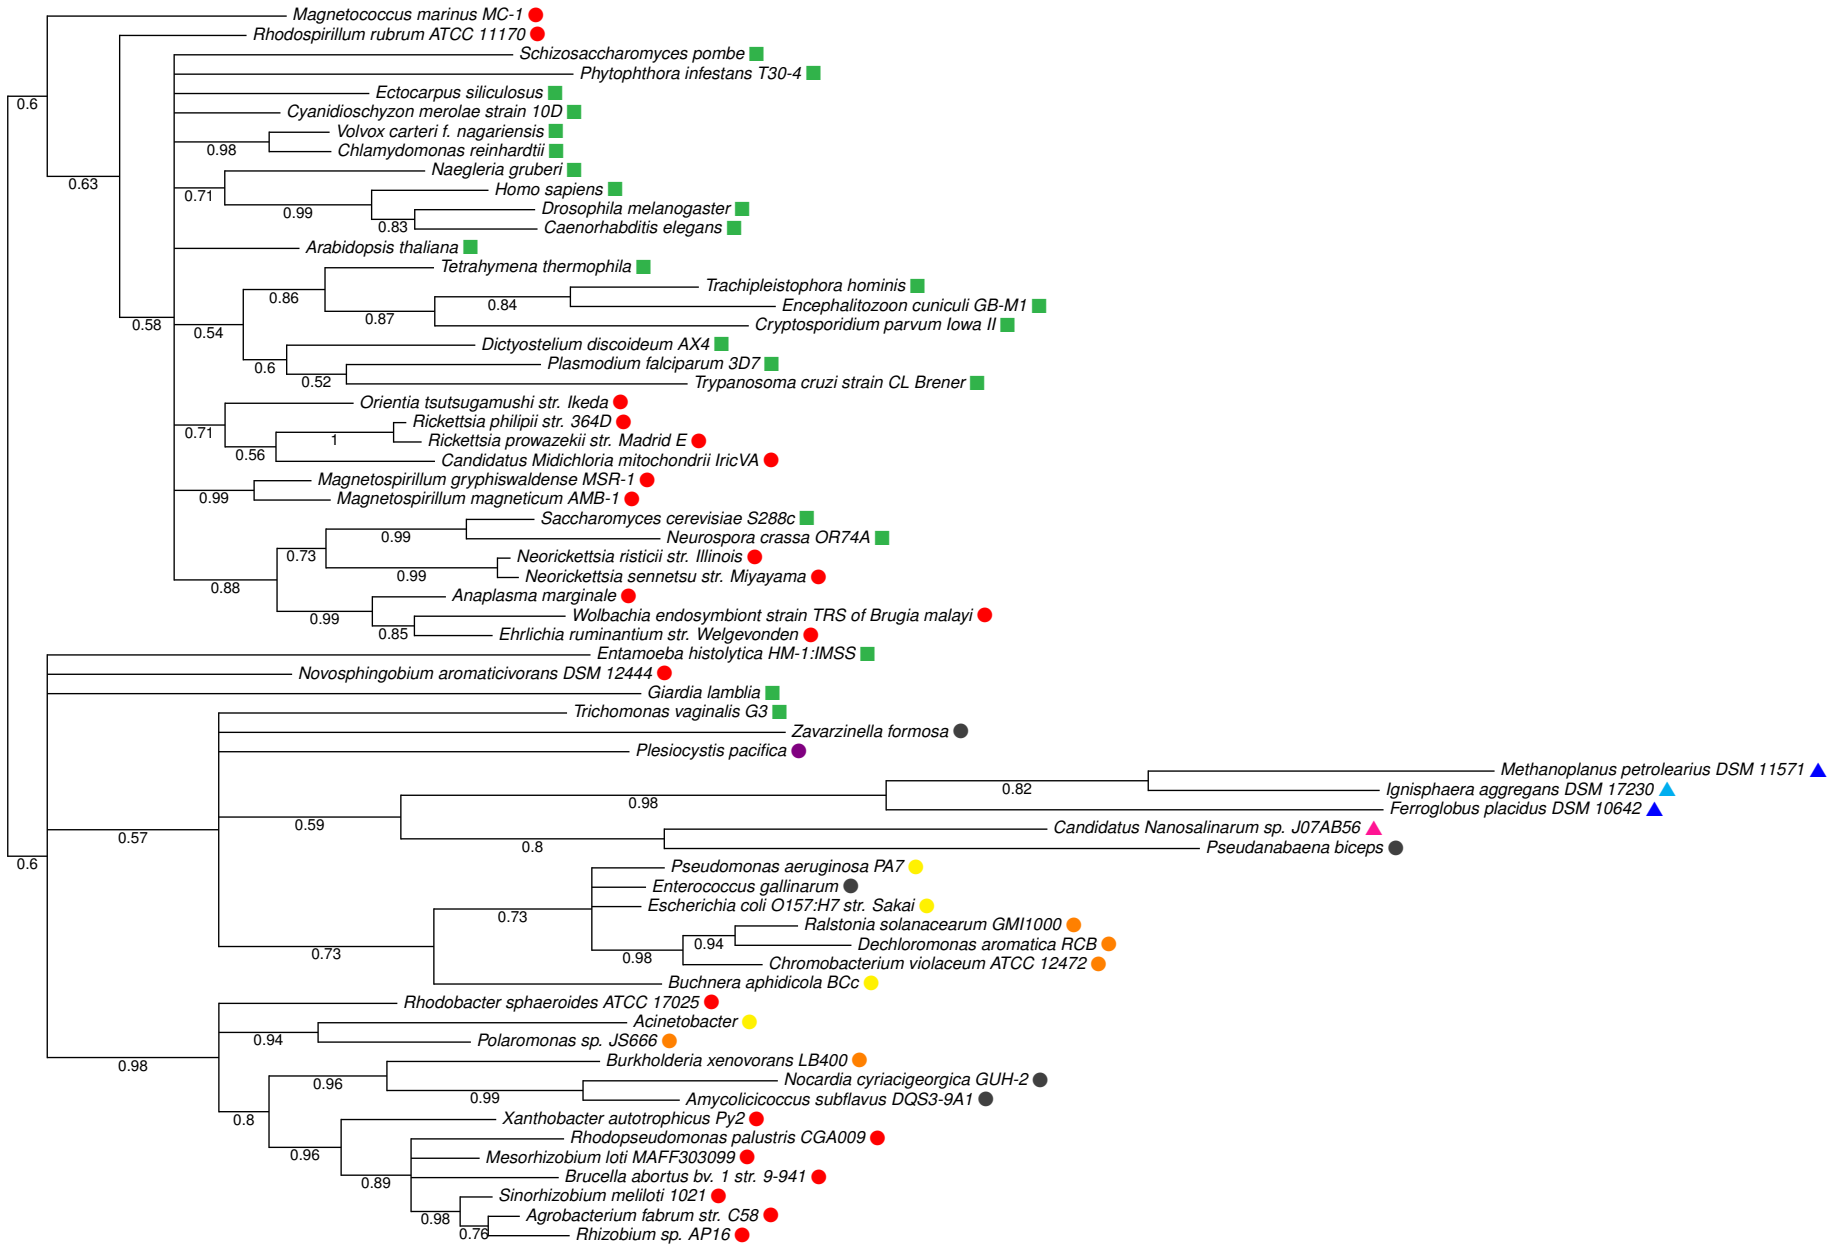

0.2

Yfh1

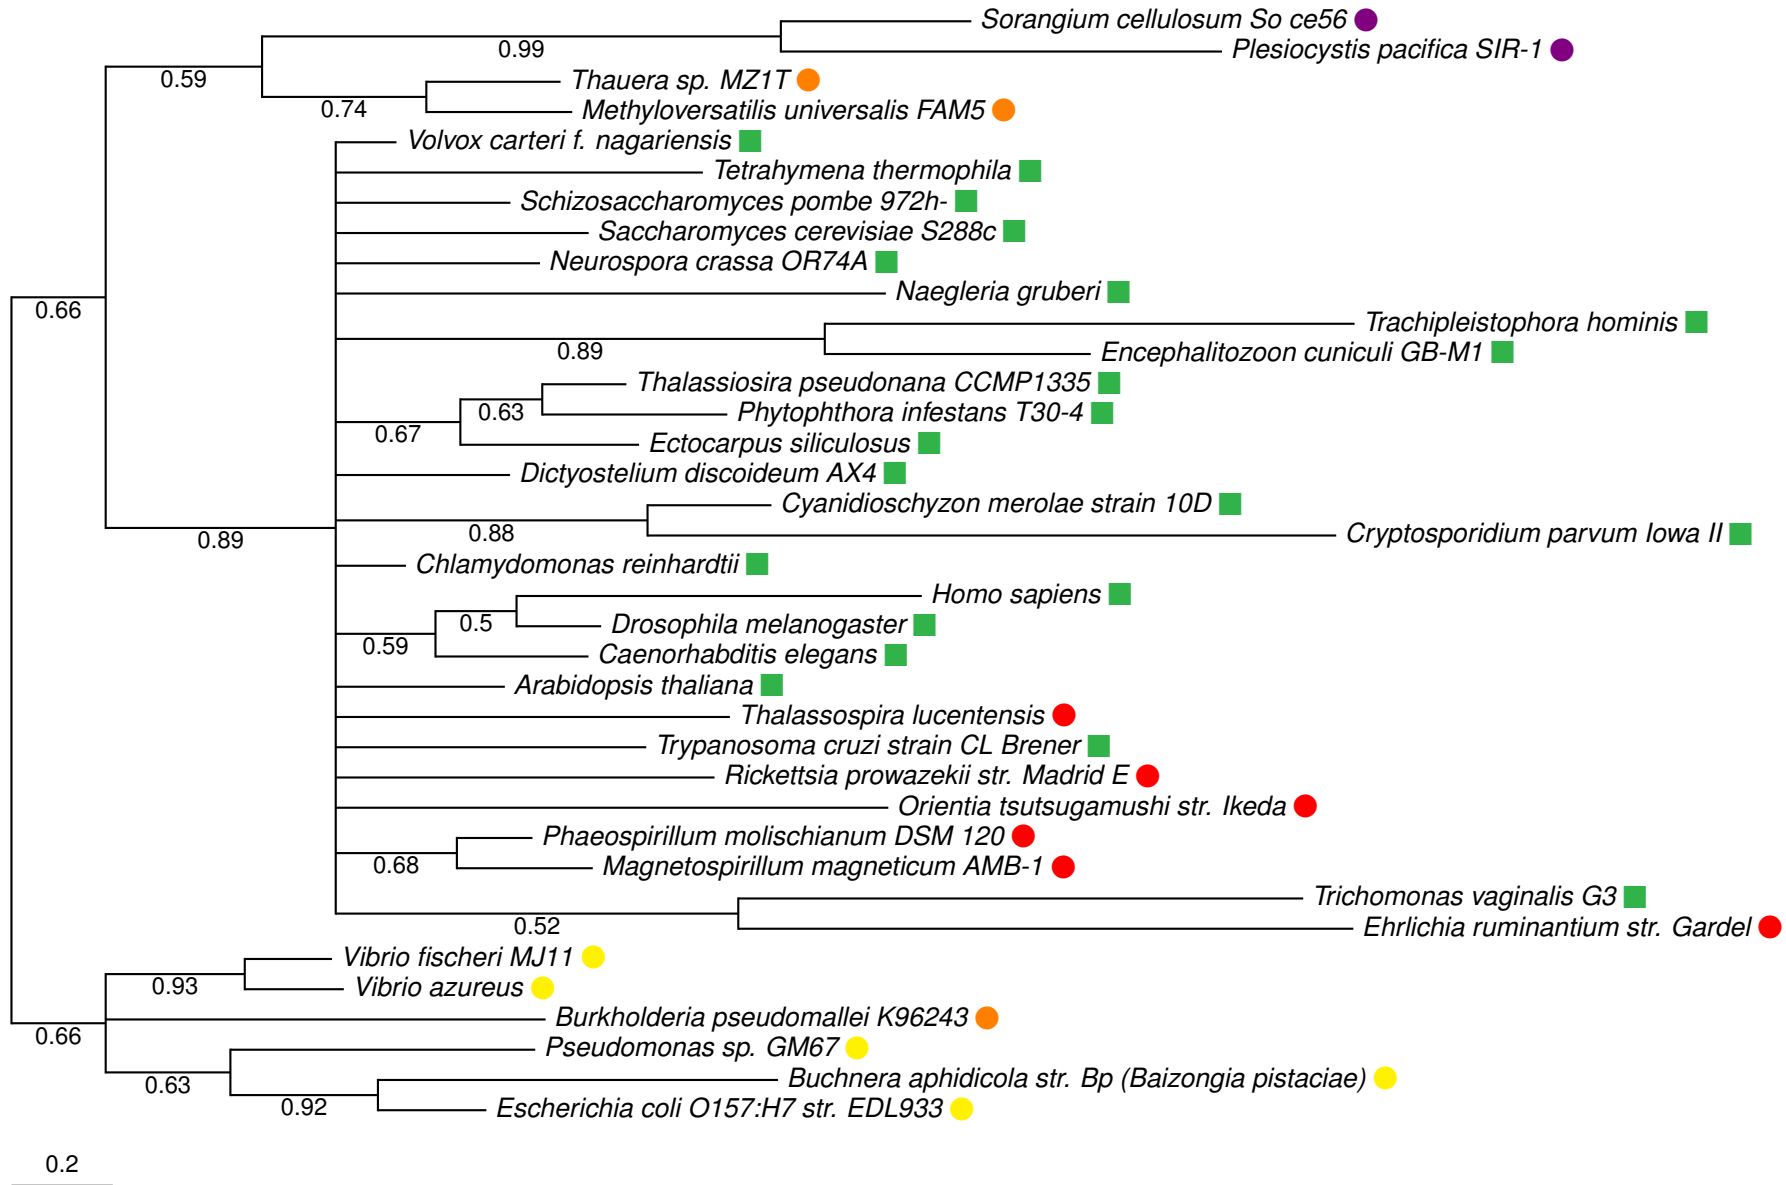

# Nfs1

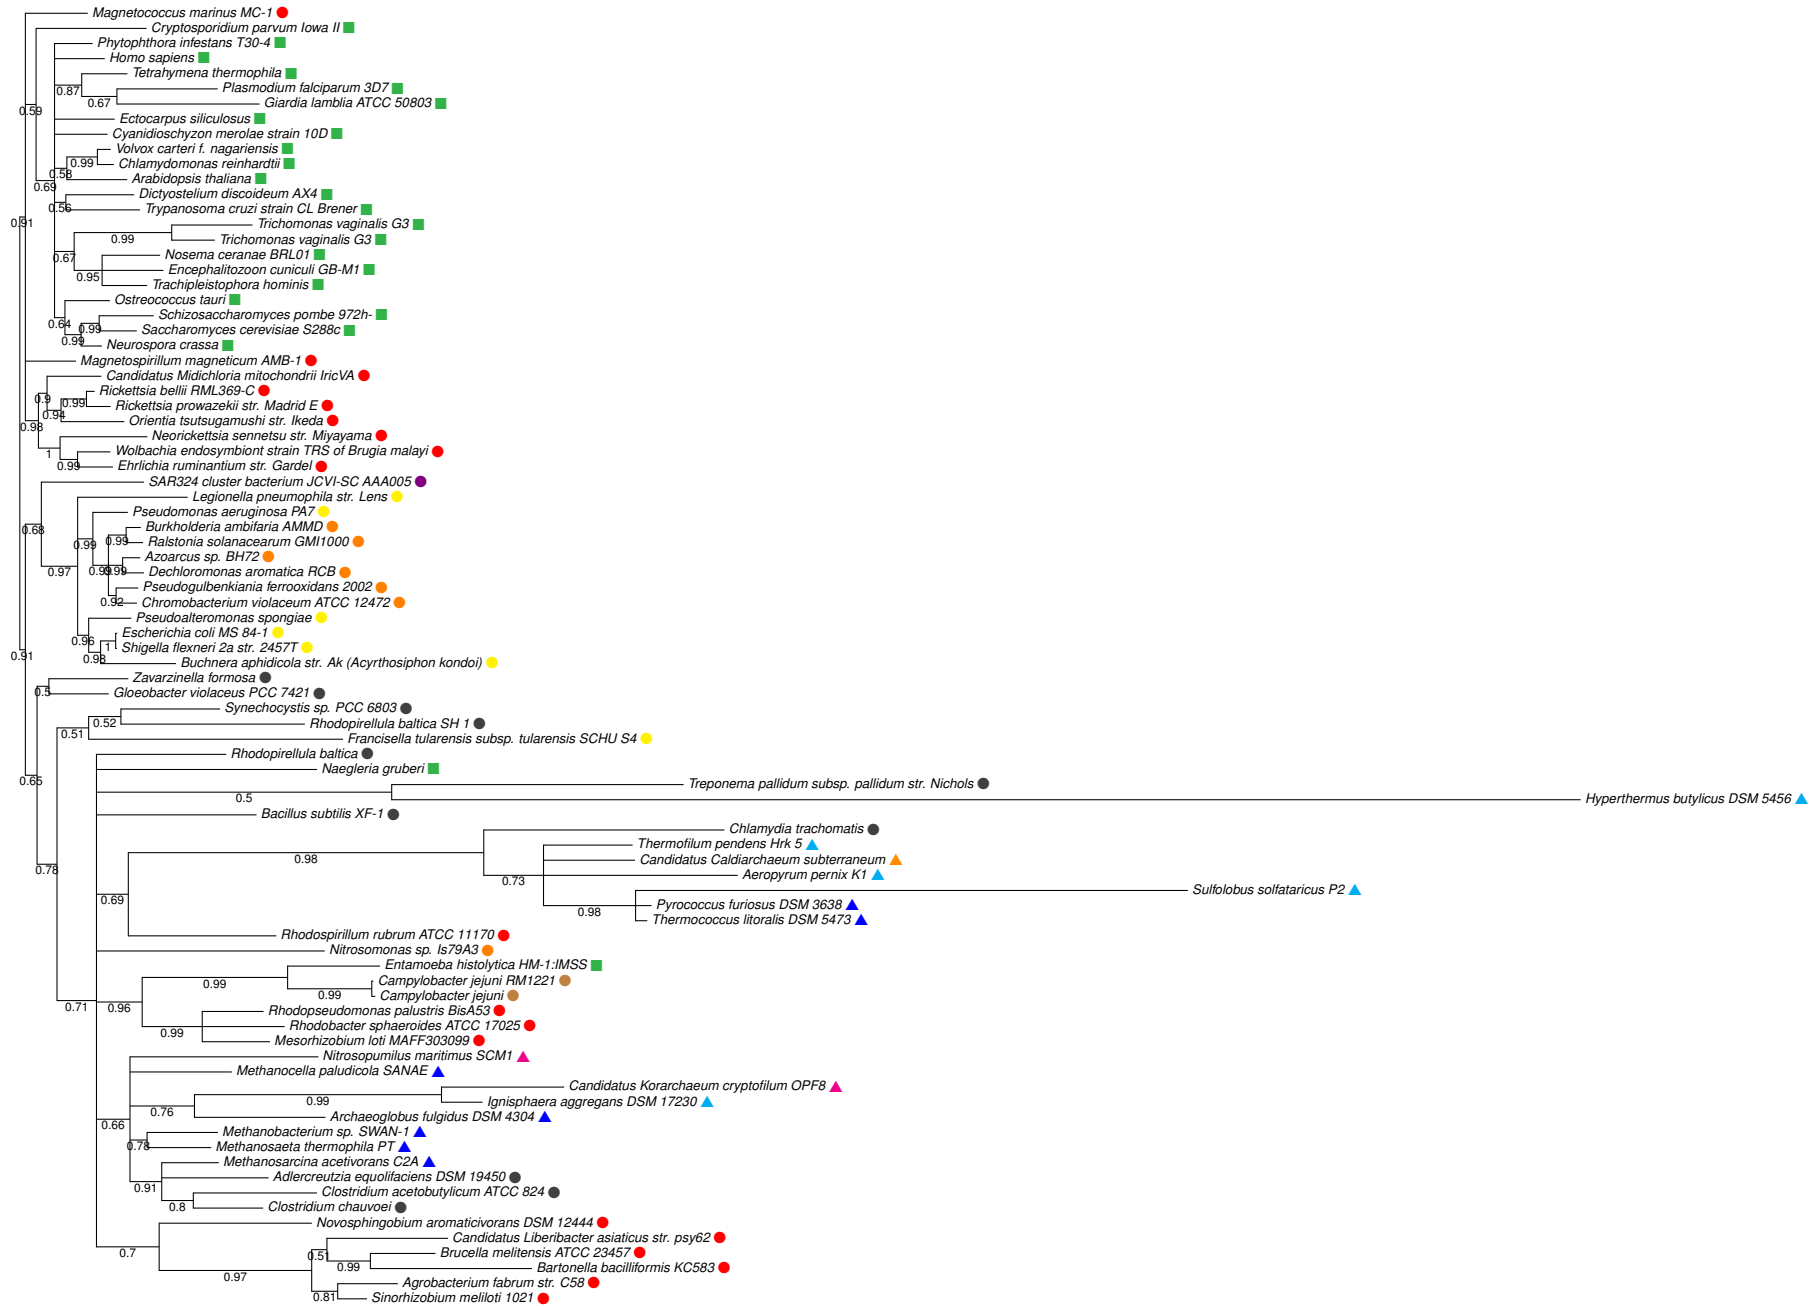

0.2

# Isu1

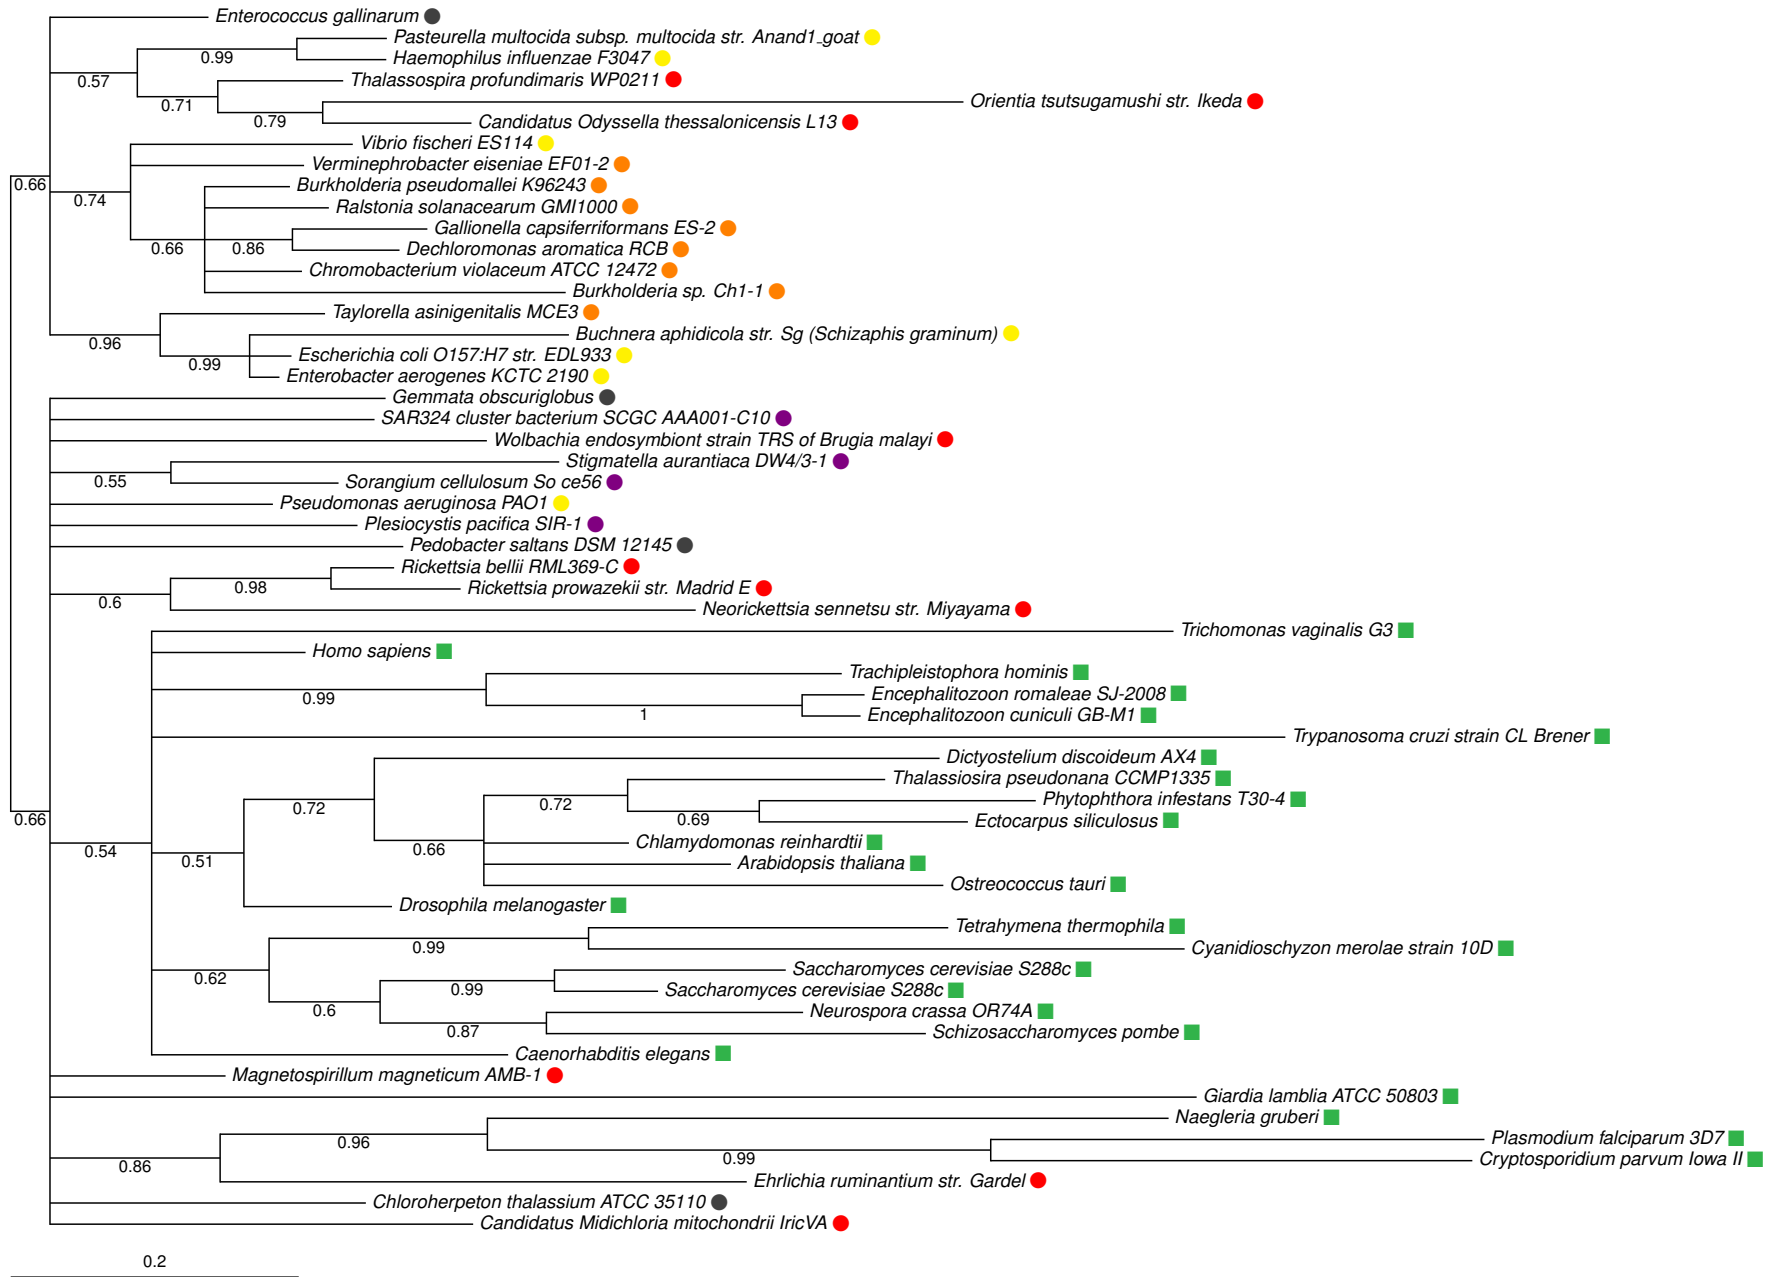

# Grx proteins

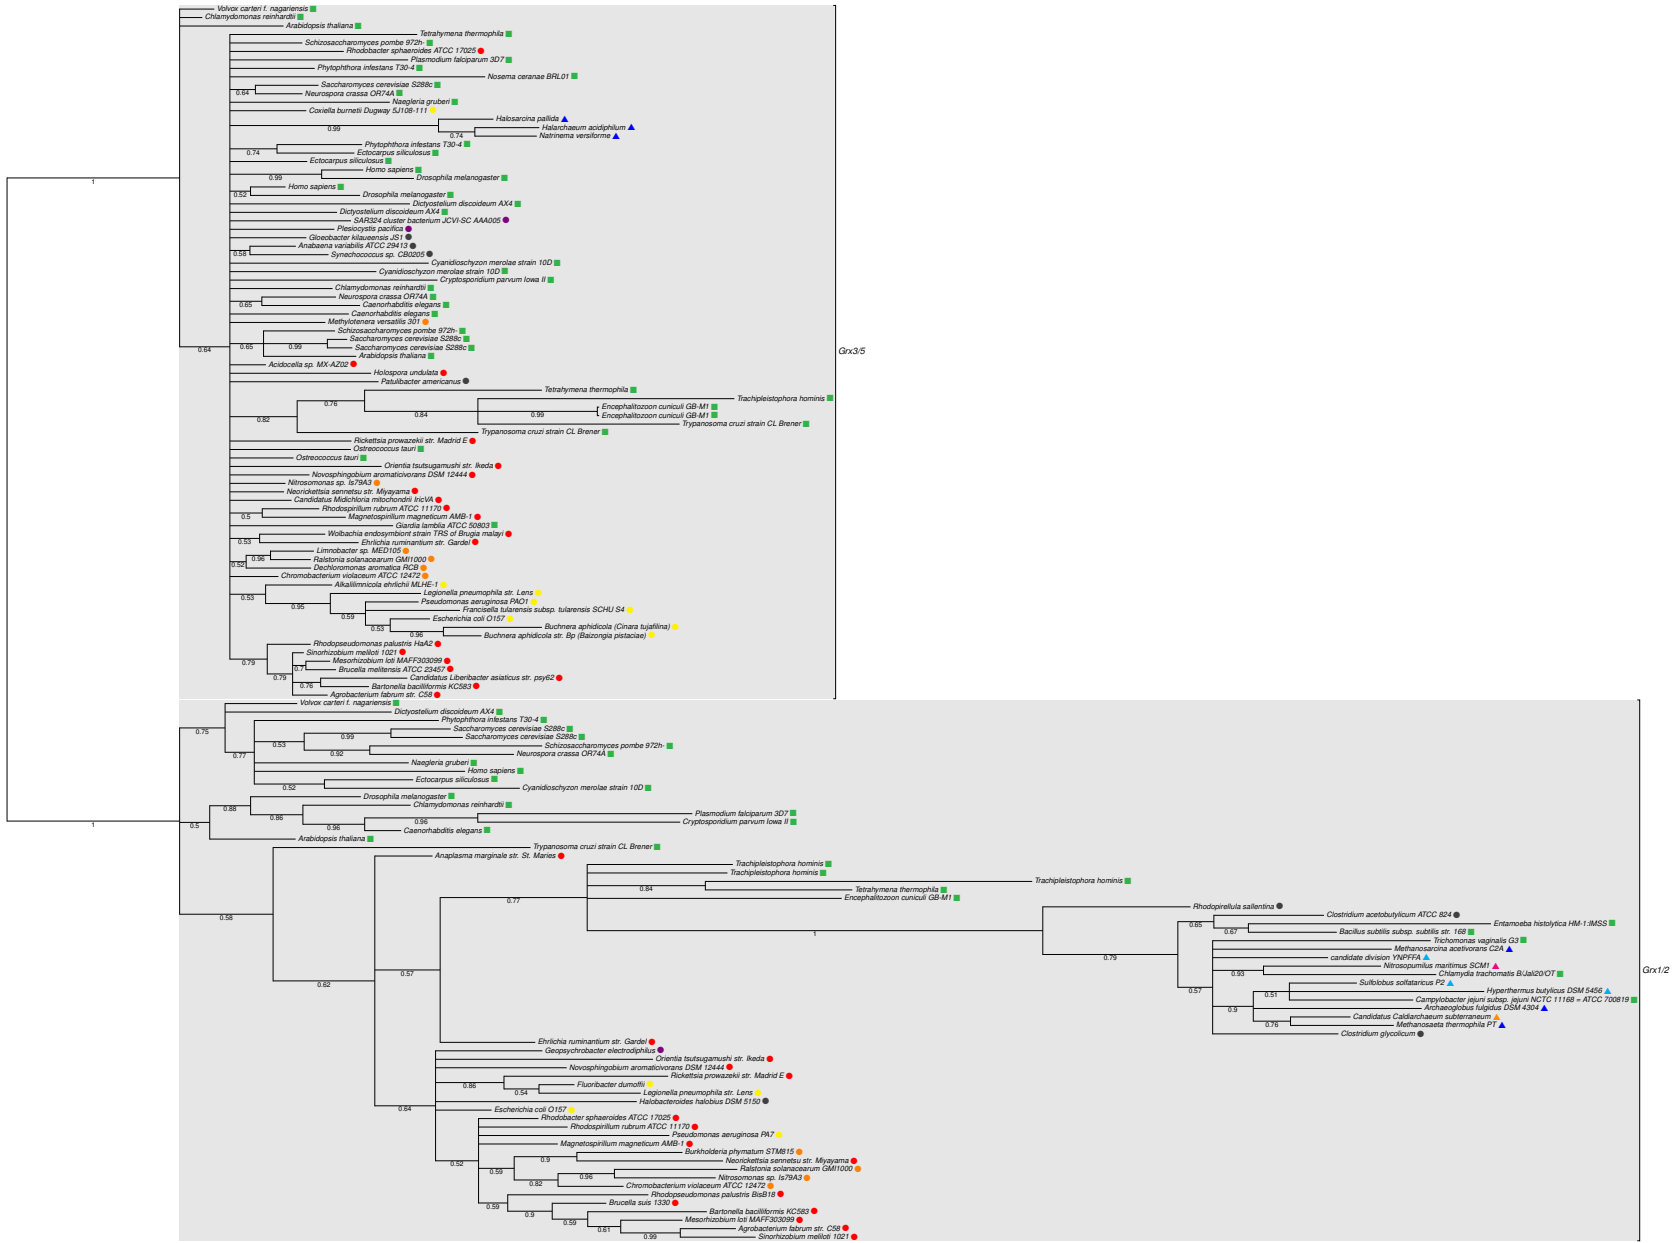

# Atm1

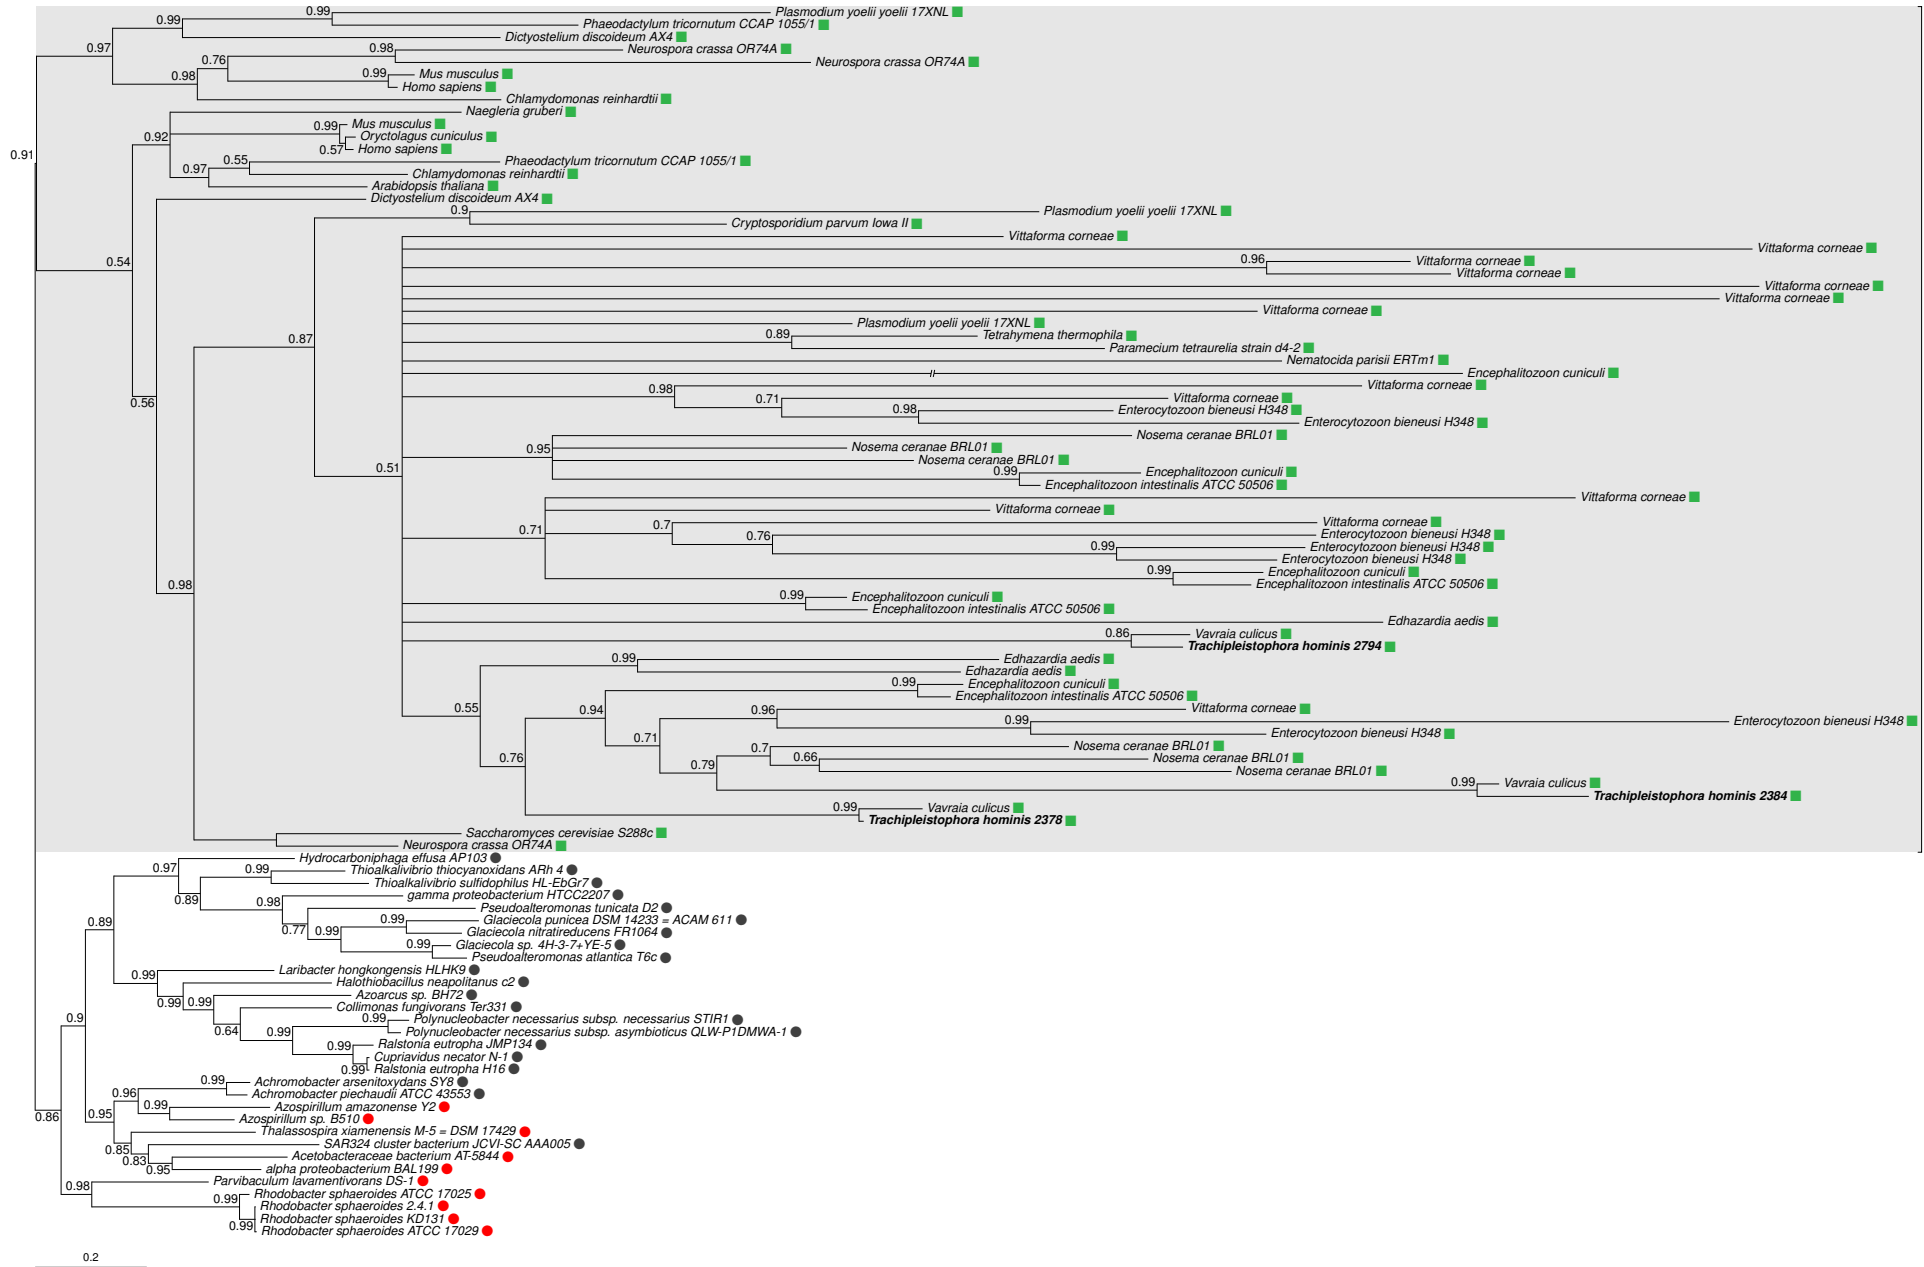

Atm1-like



## 2 Mitochondrial / mitosomal Fe/S cluster (ISC) assembly components lost in the Microsporidia

Iba57

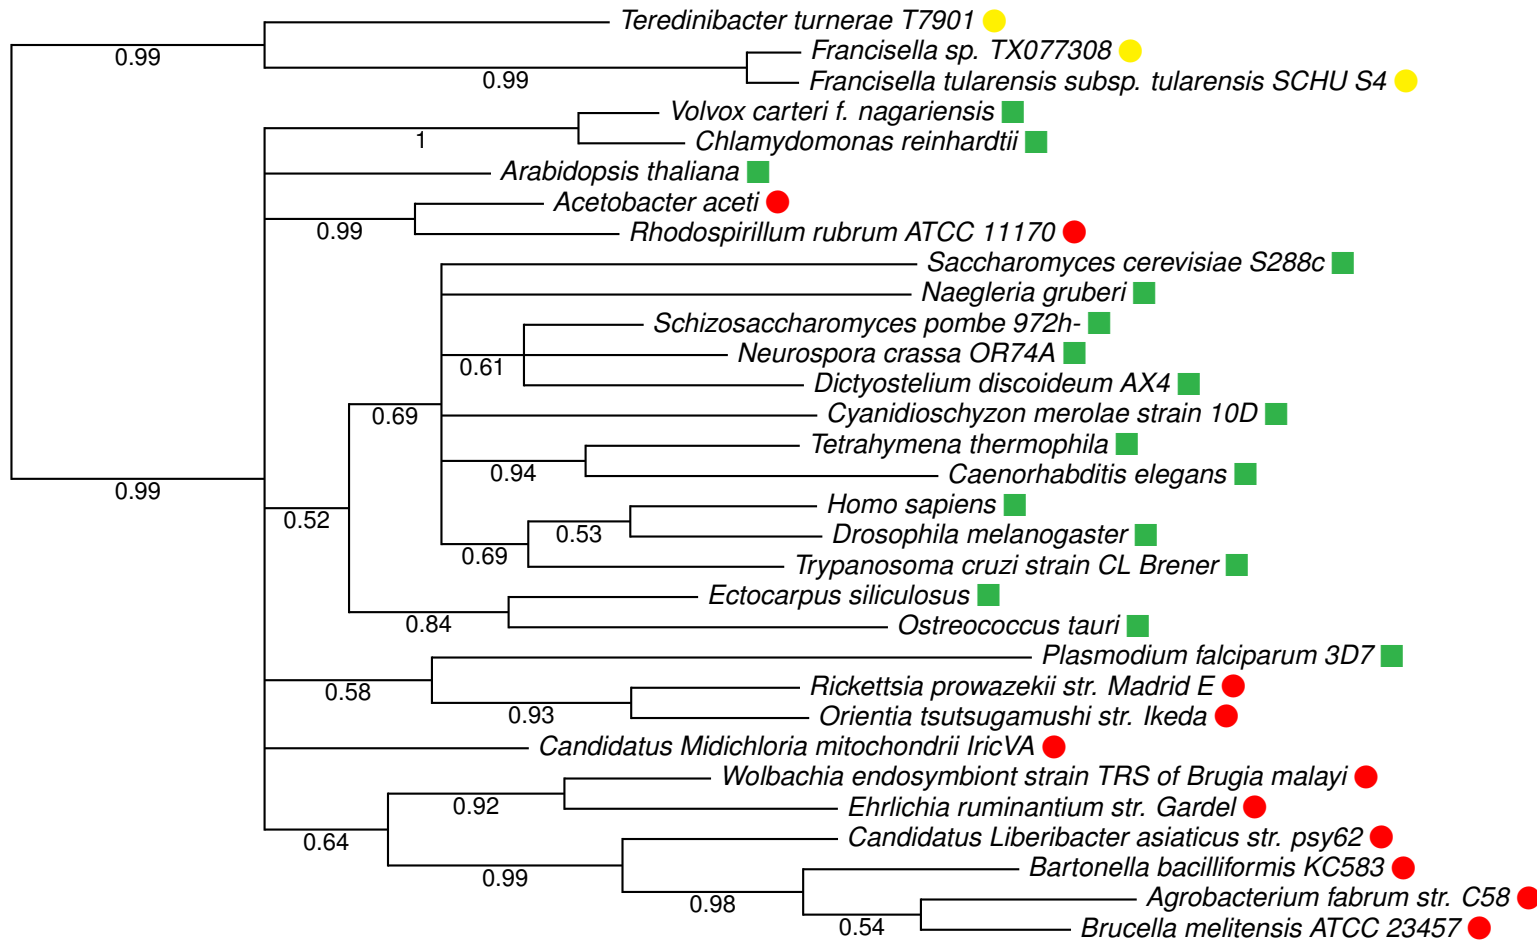

0.2

# Isa1/2

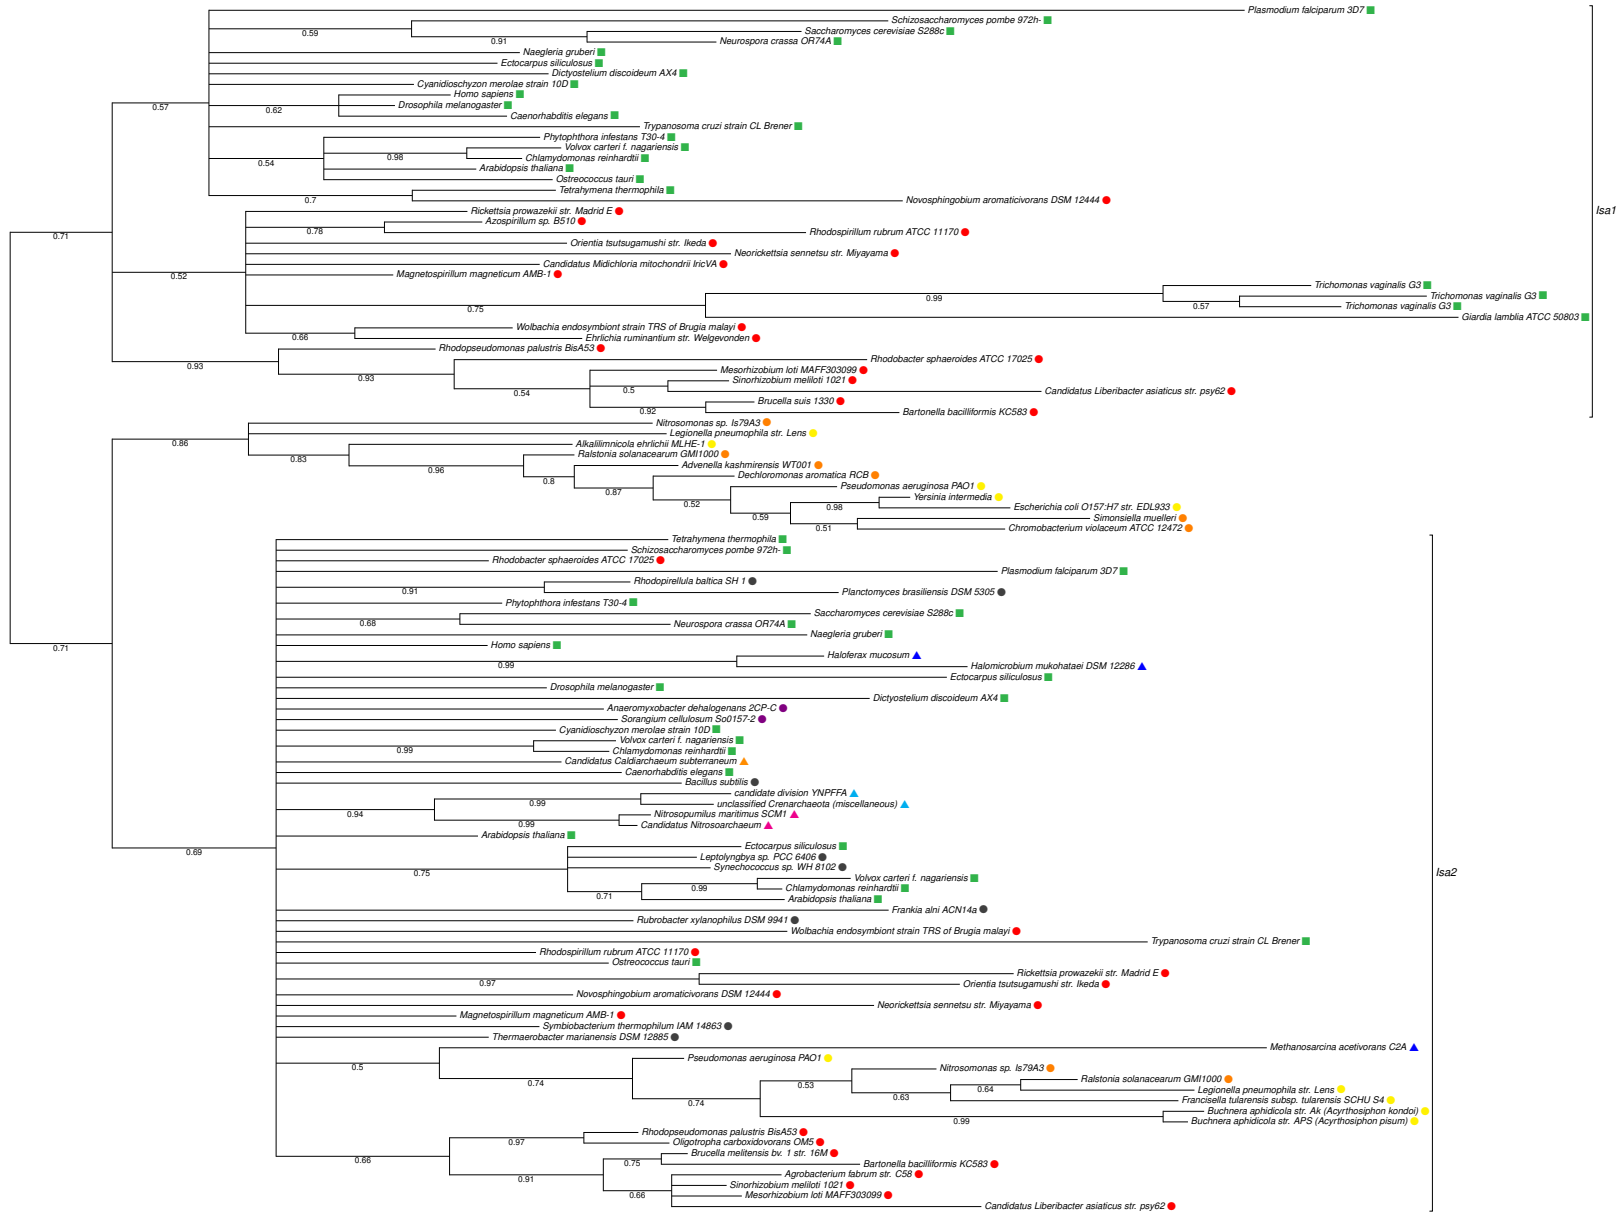

# Mge1

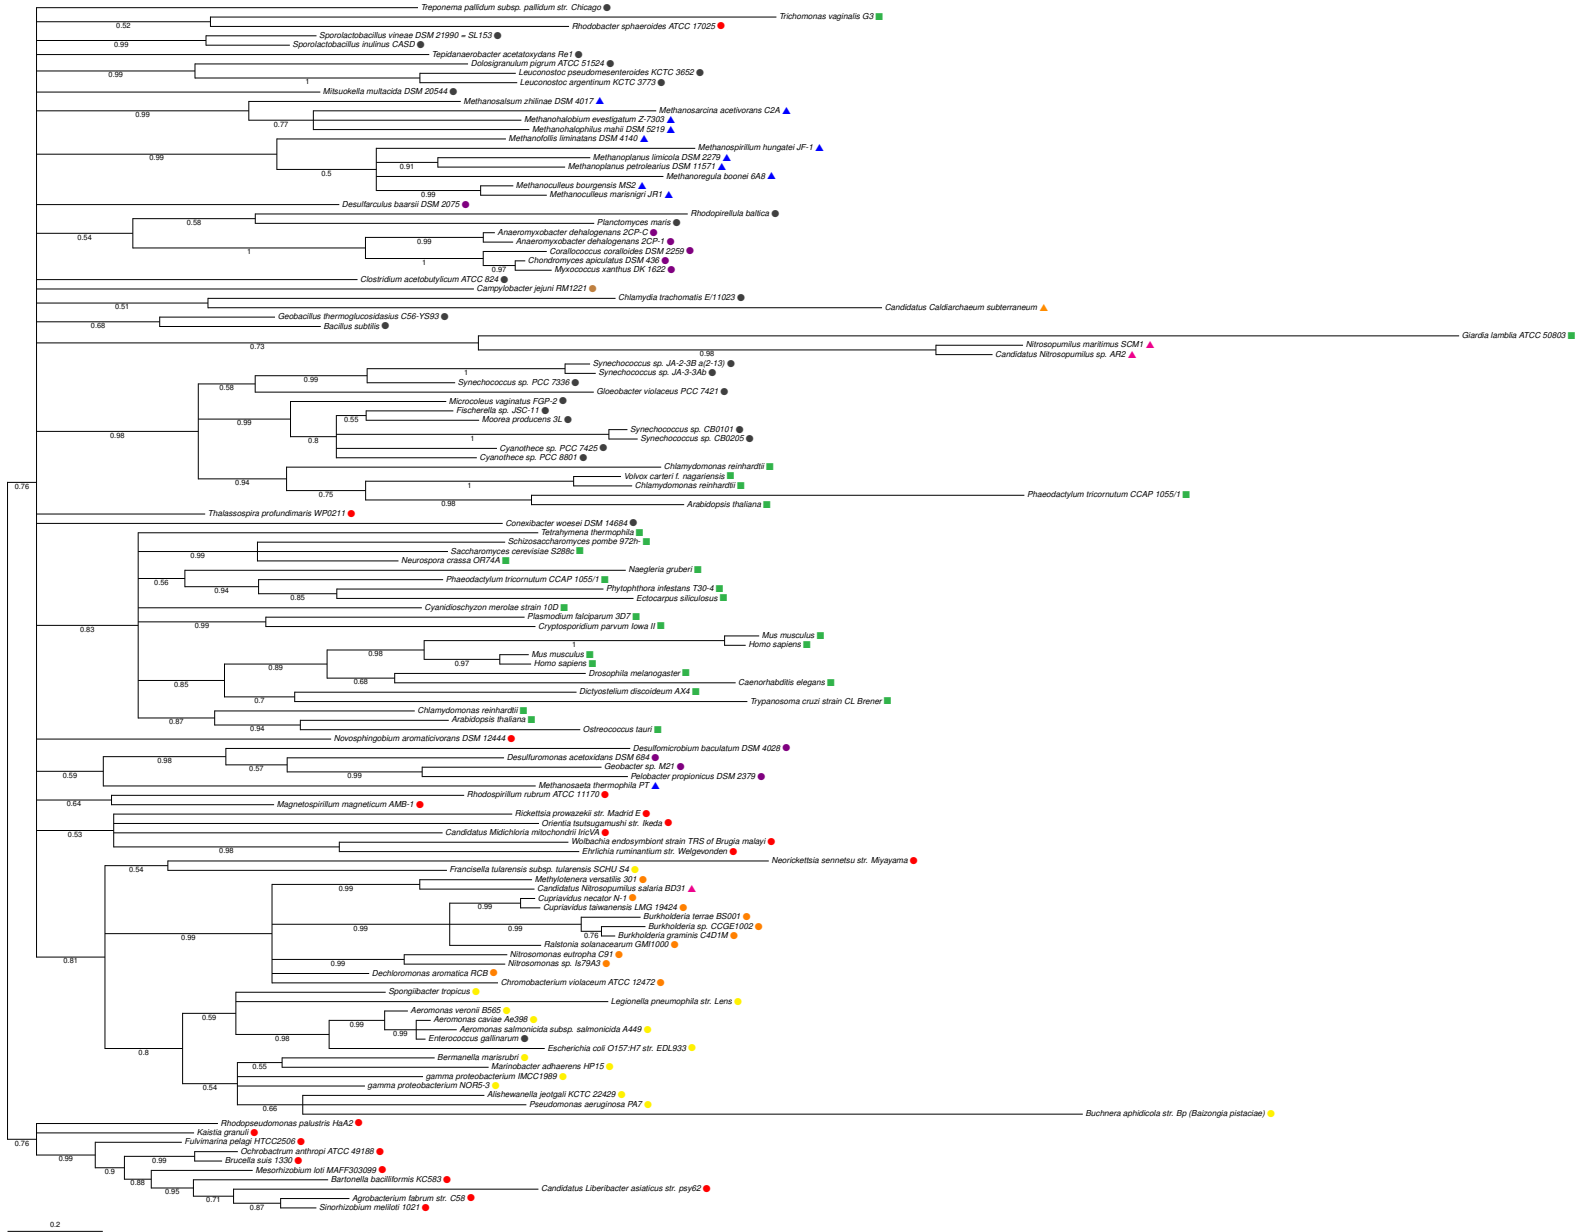

# Nfu1

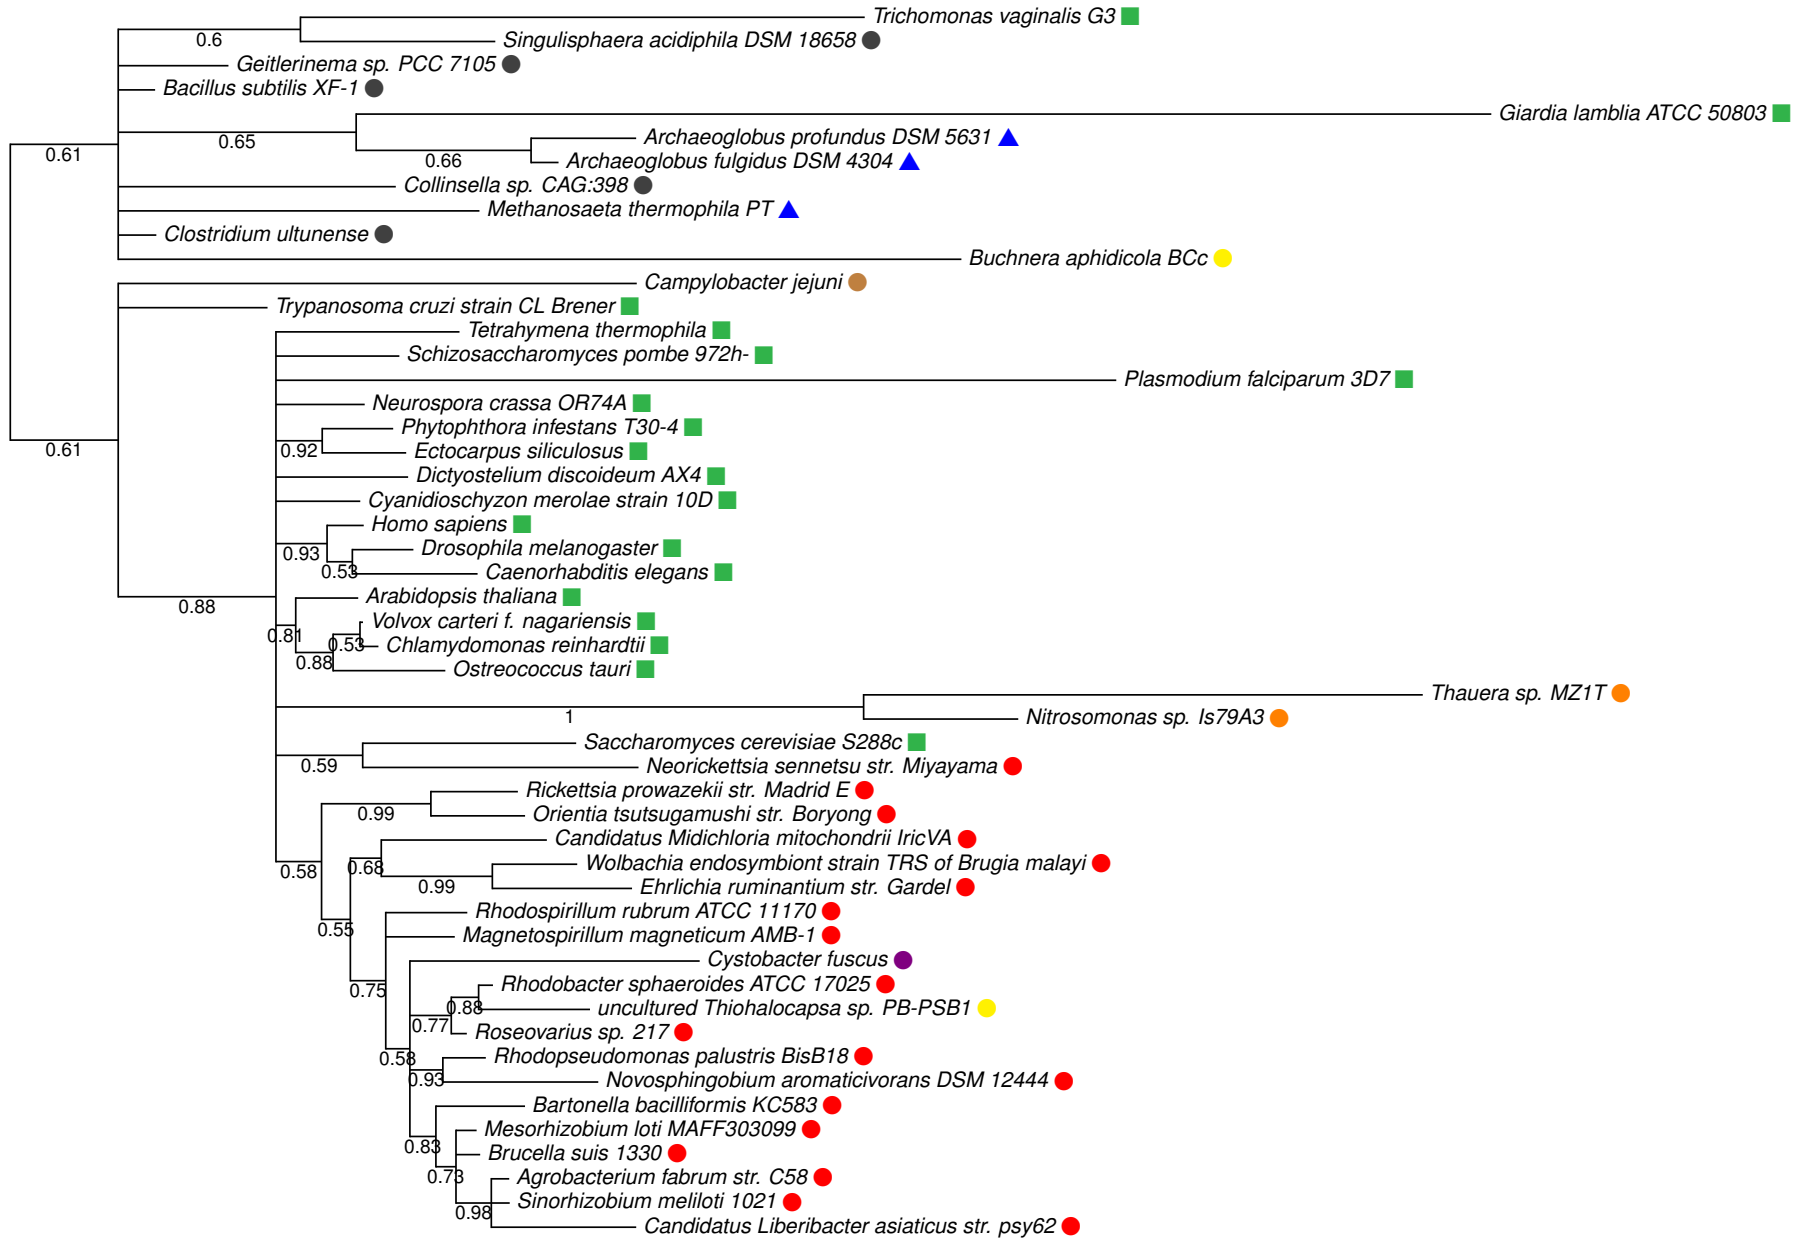

0.2

### 3 Components of the cytosolic Fe/S protein assembly (CIA) pathway

Tah18

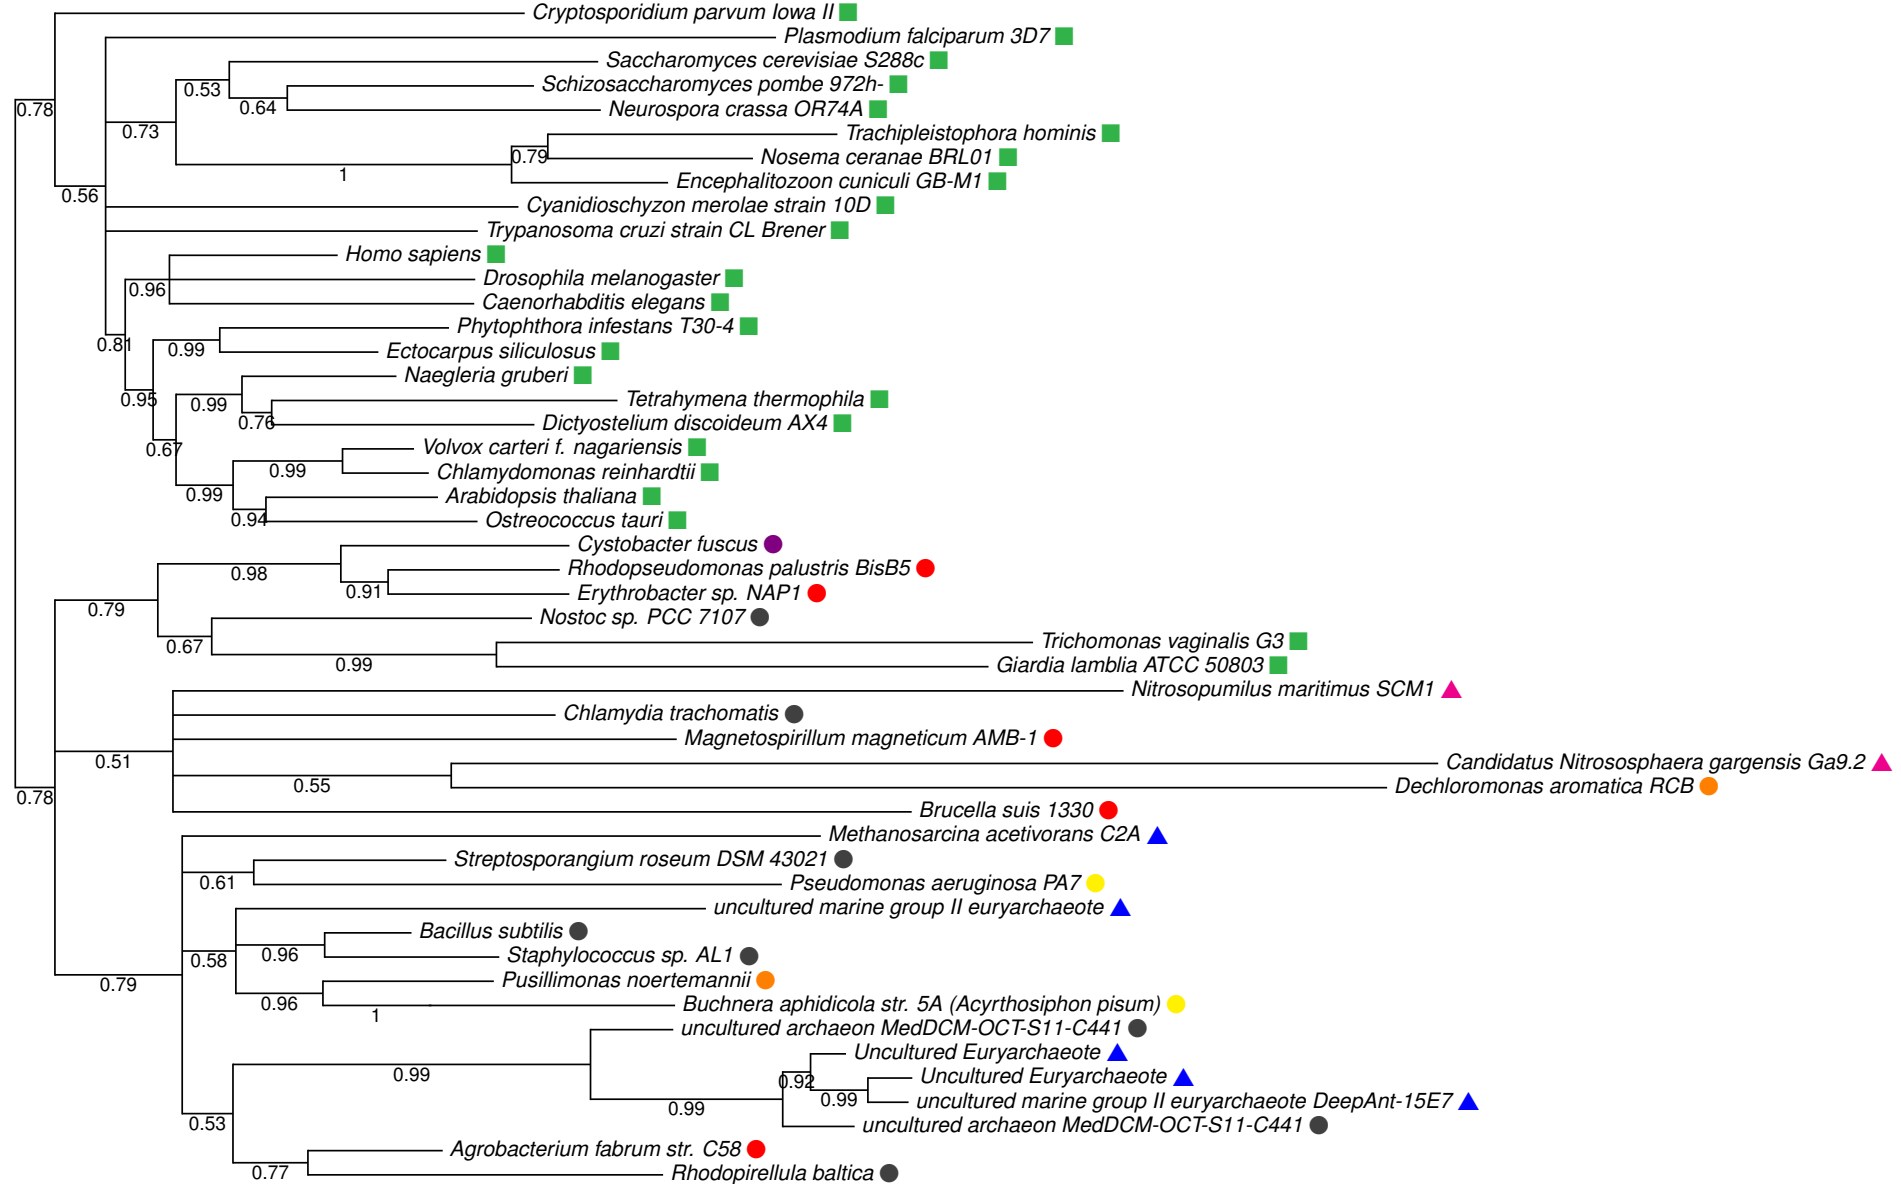

0.2

# Cfd1/Nbp35/Ind1

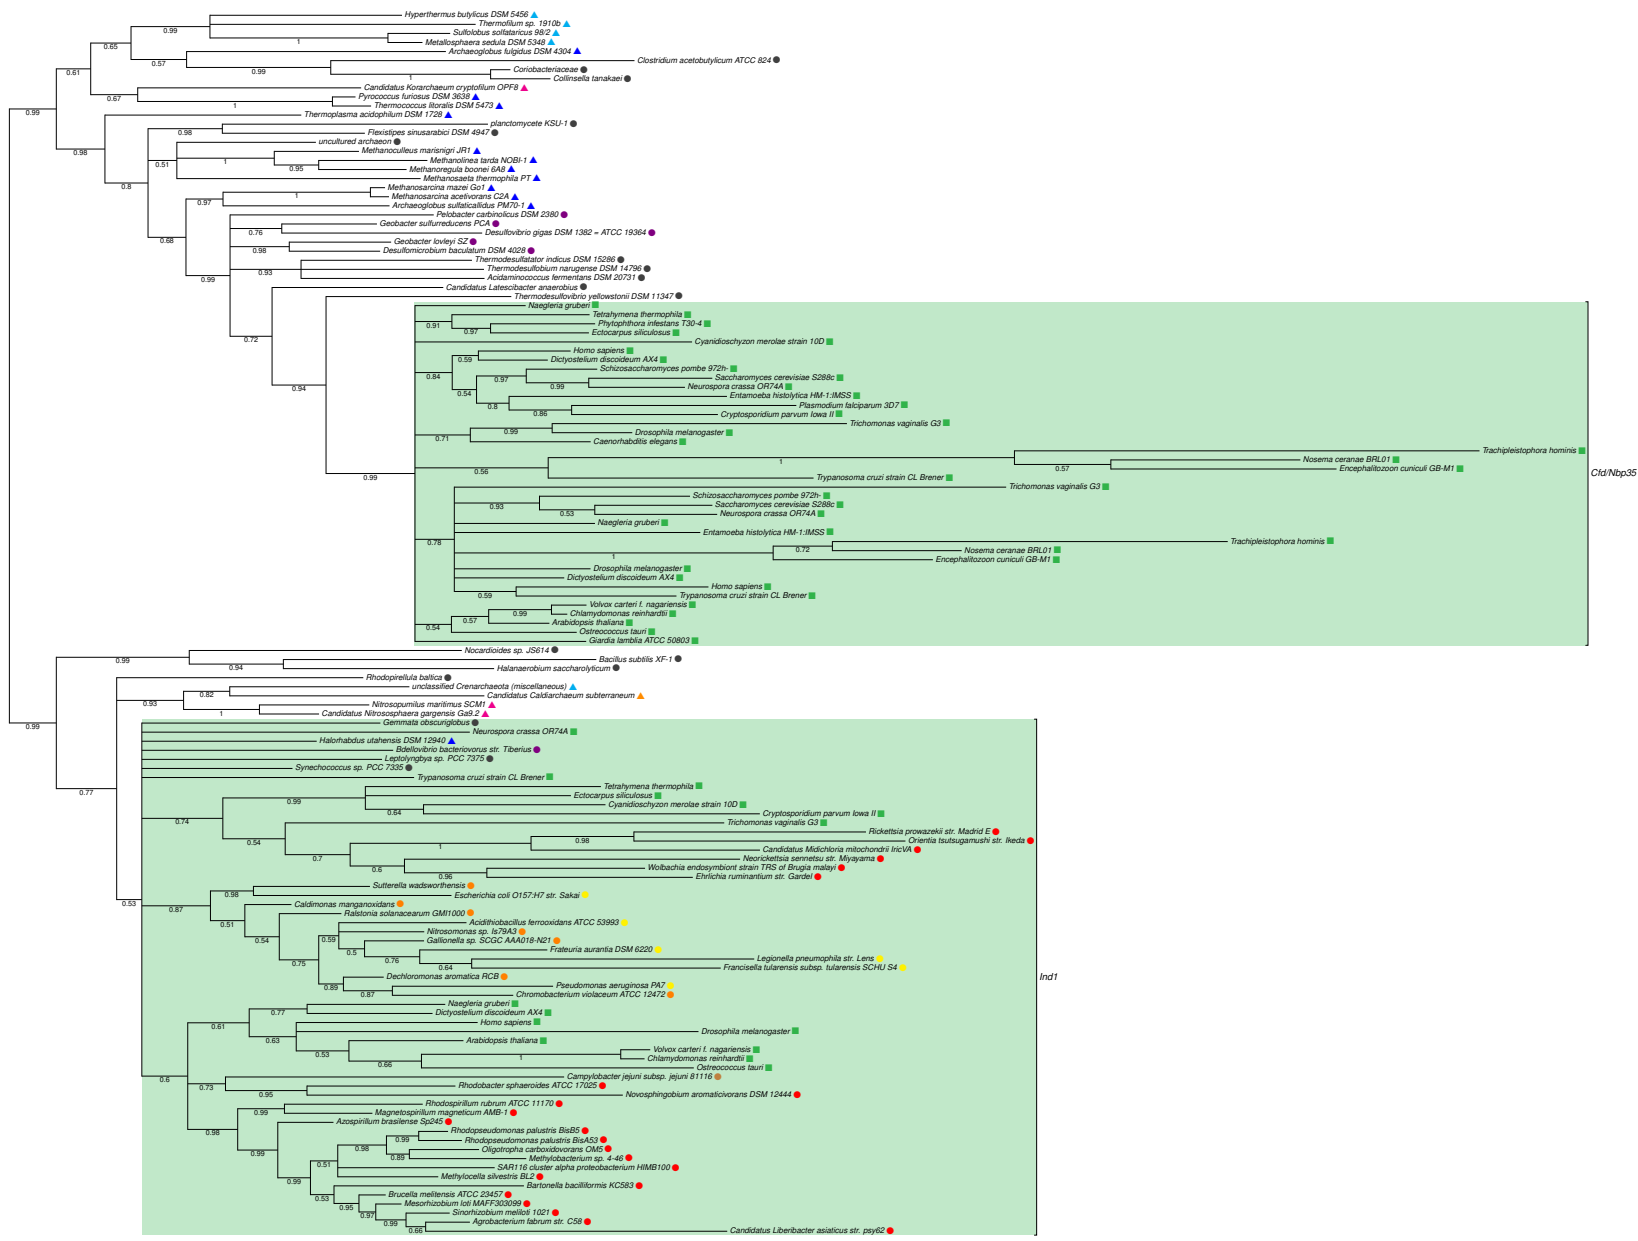

Ind1 is localized to mitochondria.

Nar1

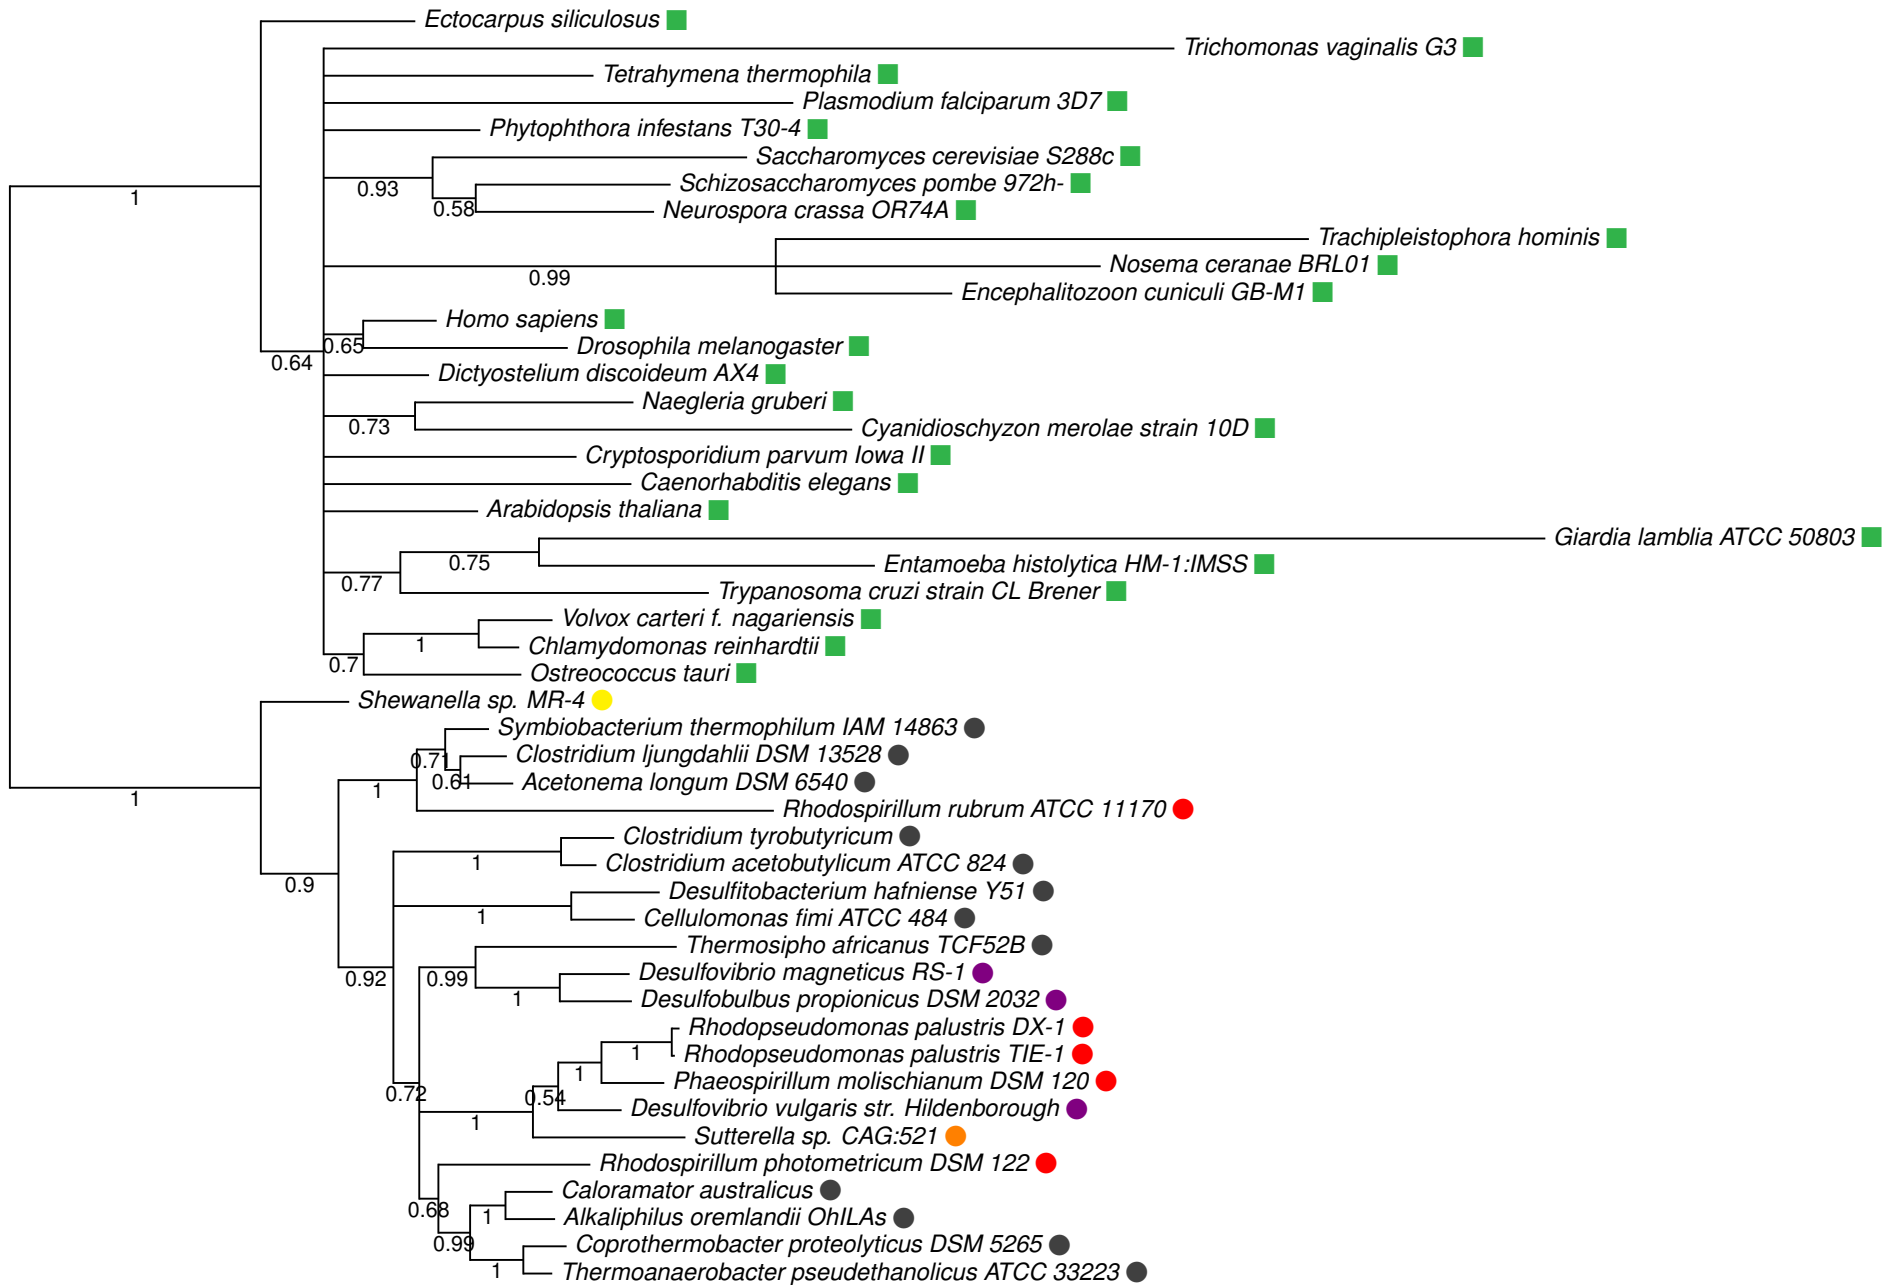

0.2

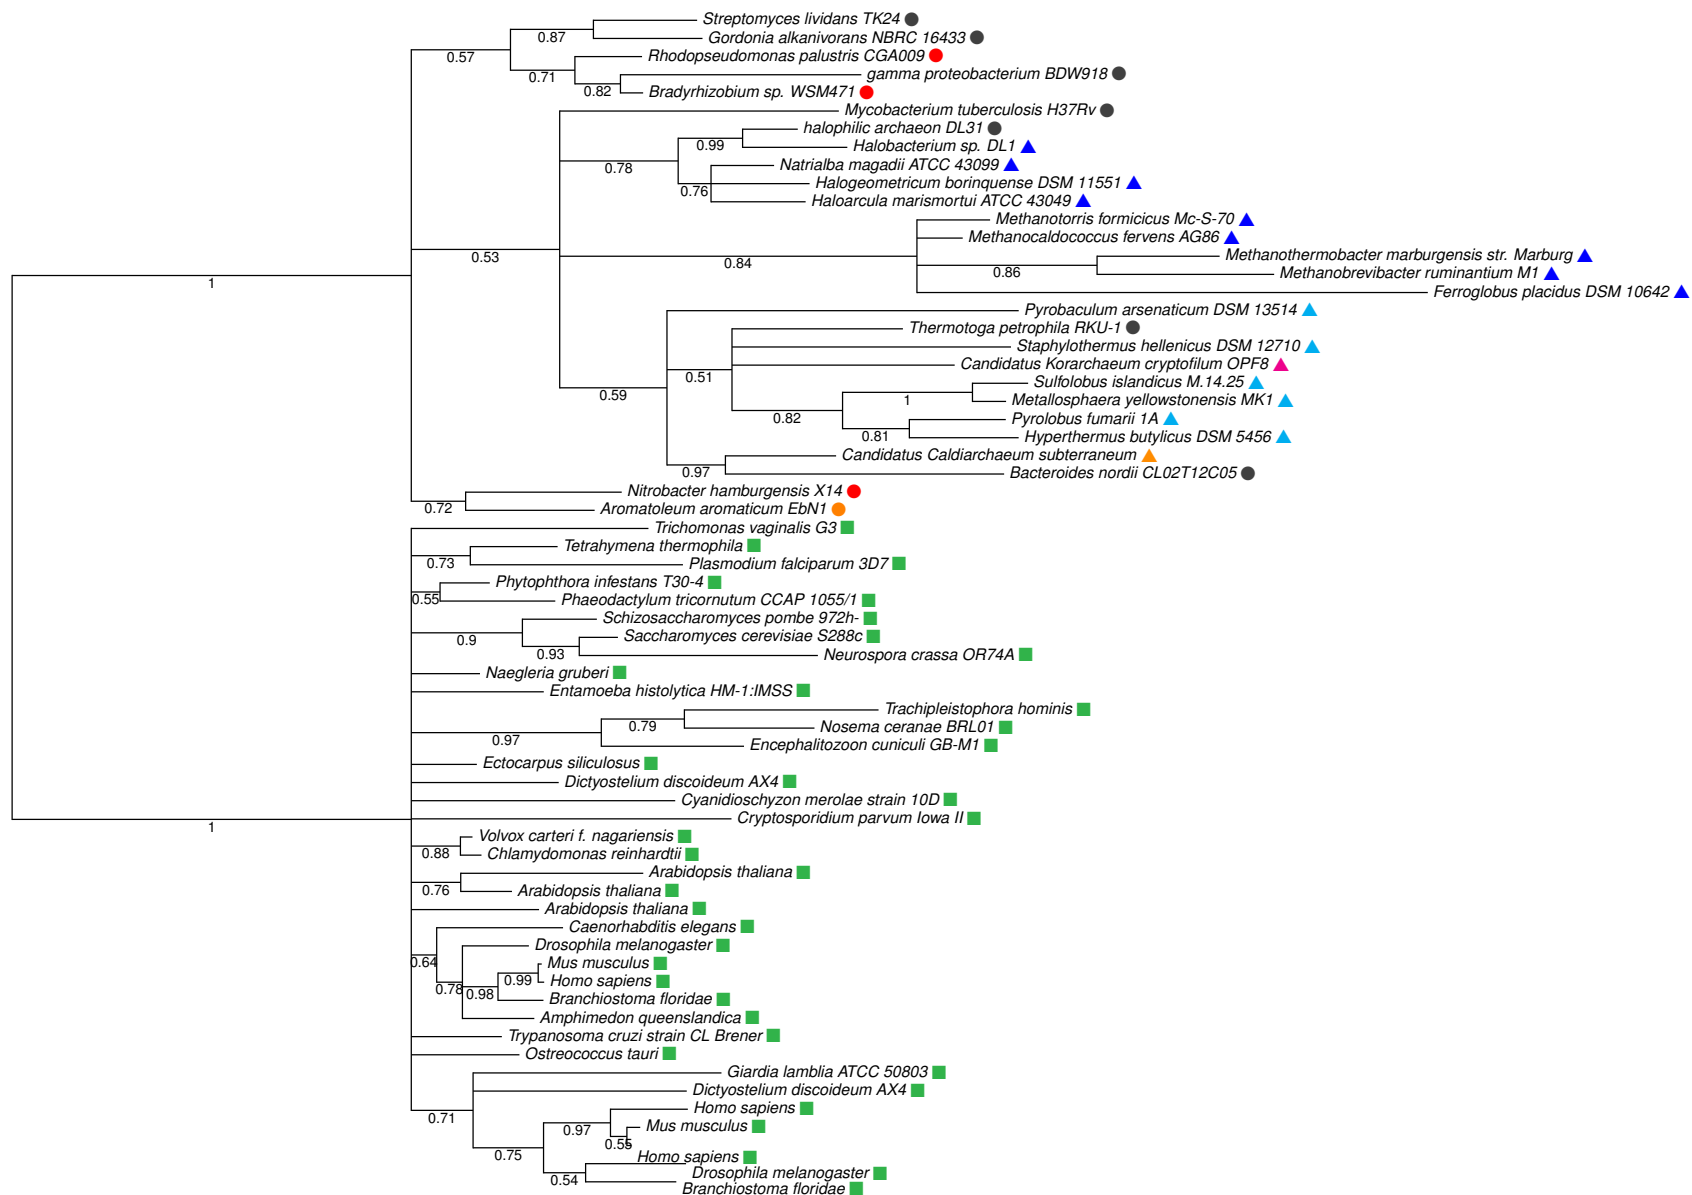

0.2

Note that the region that can be aligned between eukaryotes and prokaryotes is quite short for this protein (122 amino acids), and the specific relationships between the eukaryotes and any particular prokaryotic group are therefore tentative.



# 4 Nuclear and cytosolic Fe/S cluster-containing proteins

Rli1

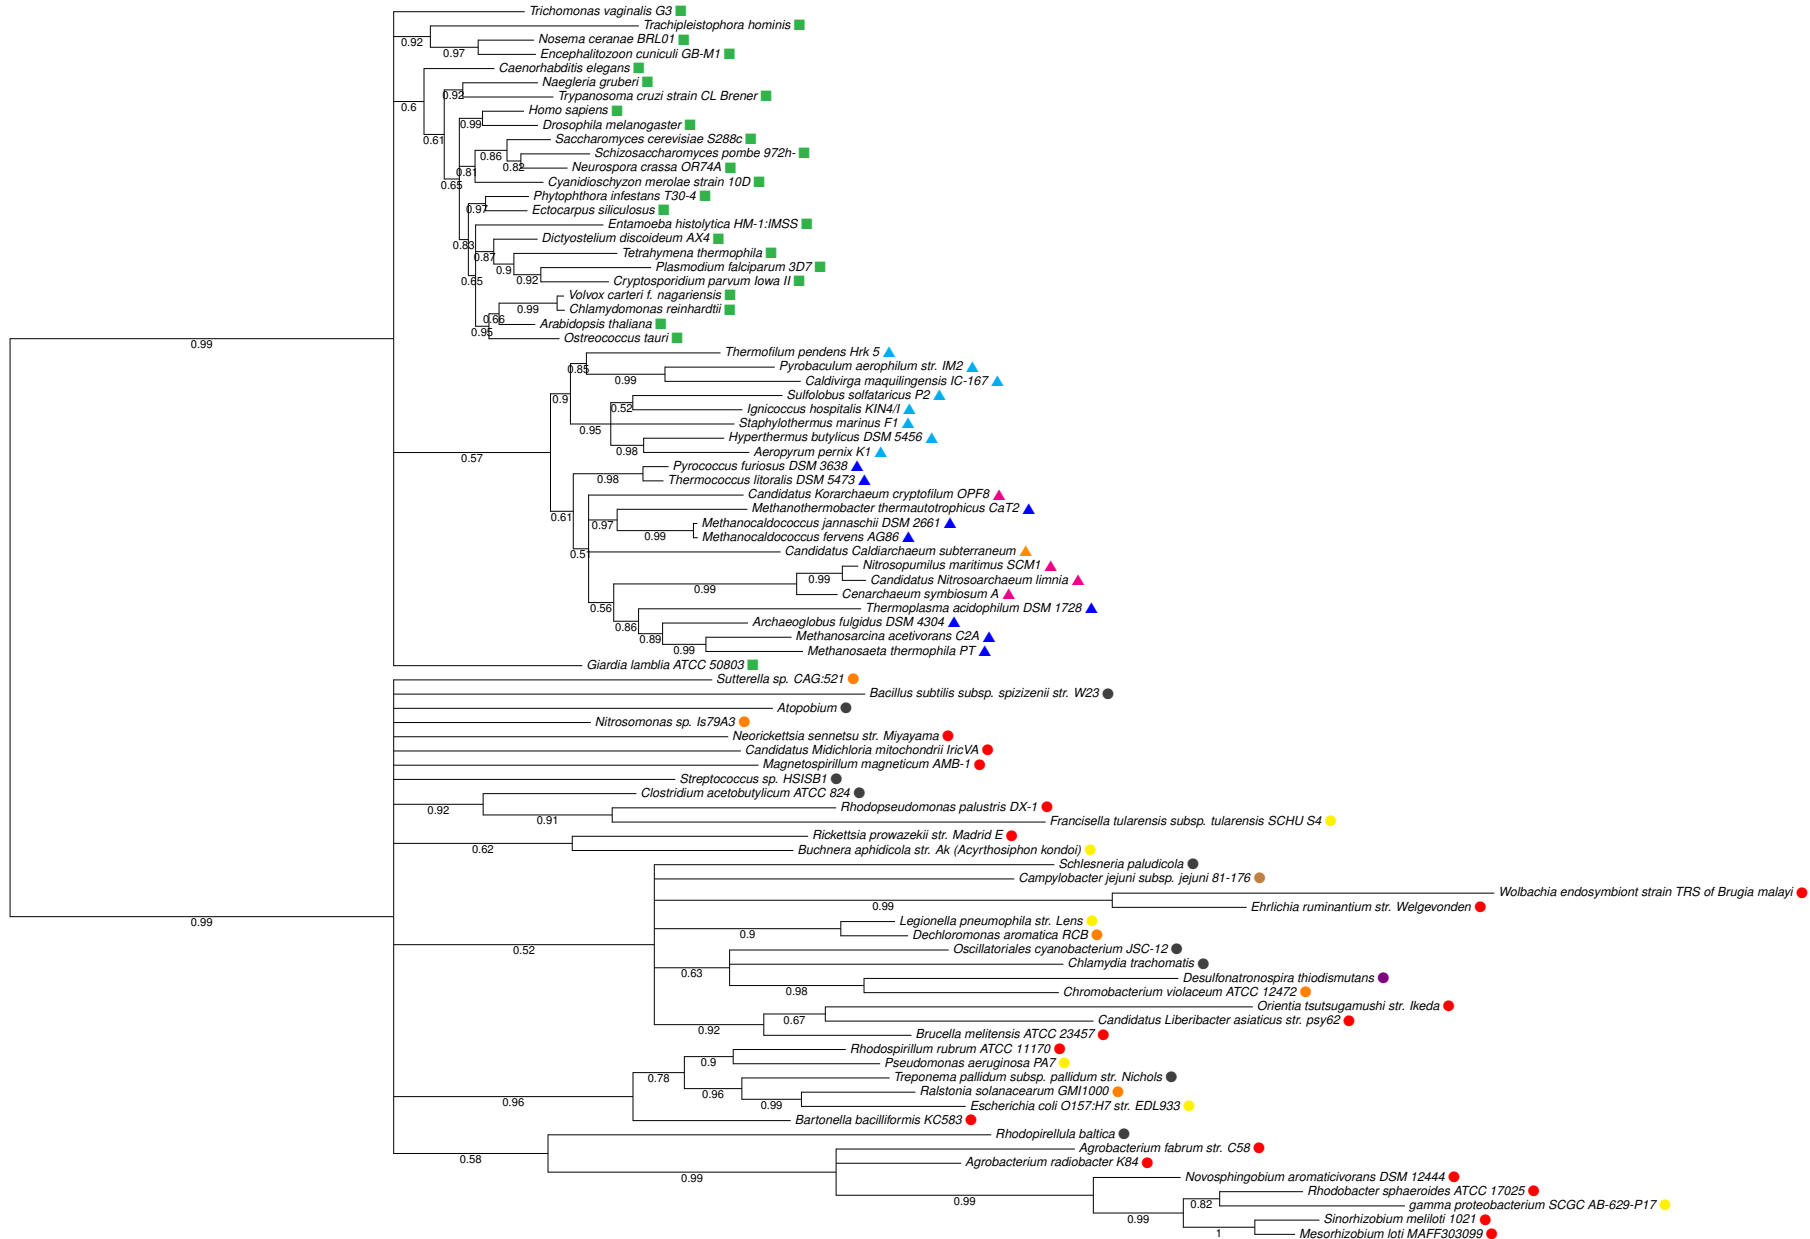

# Elp3

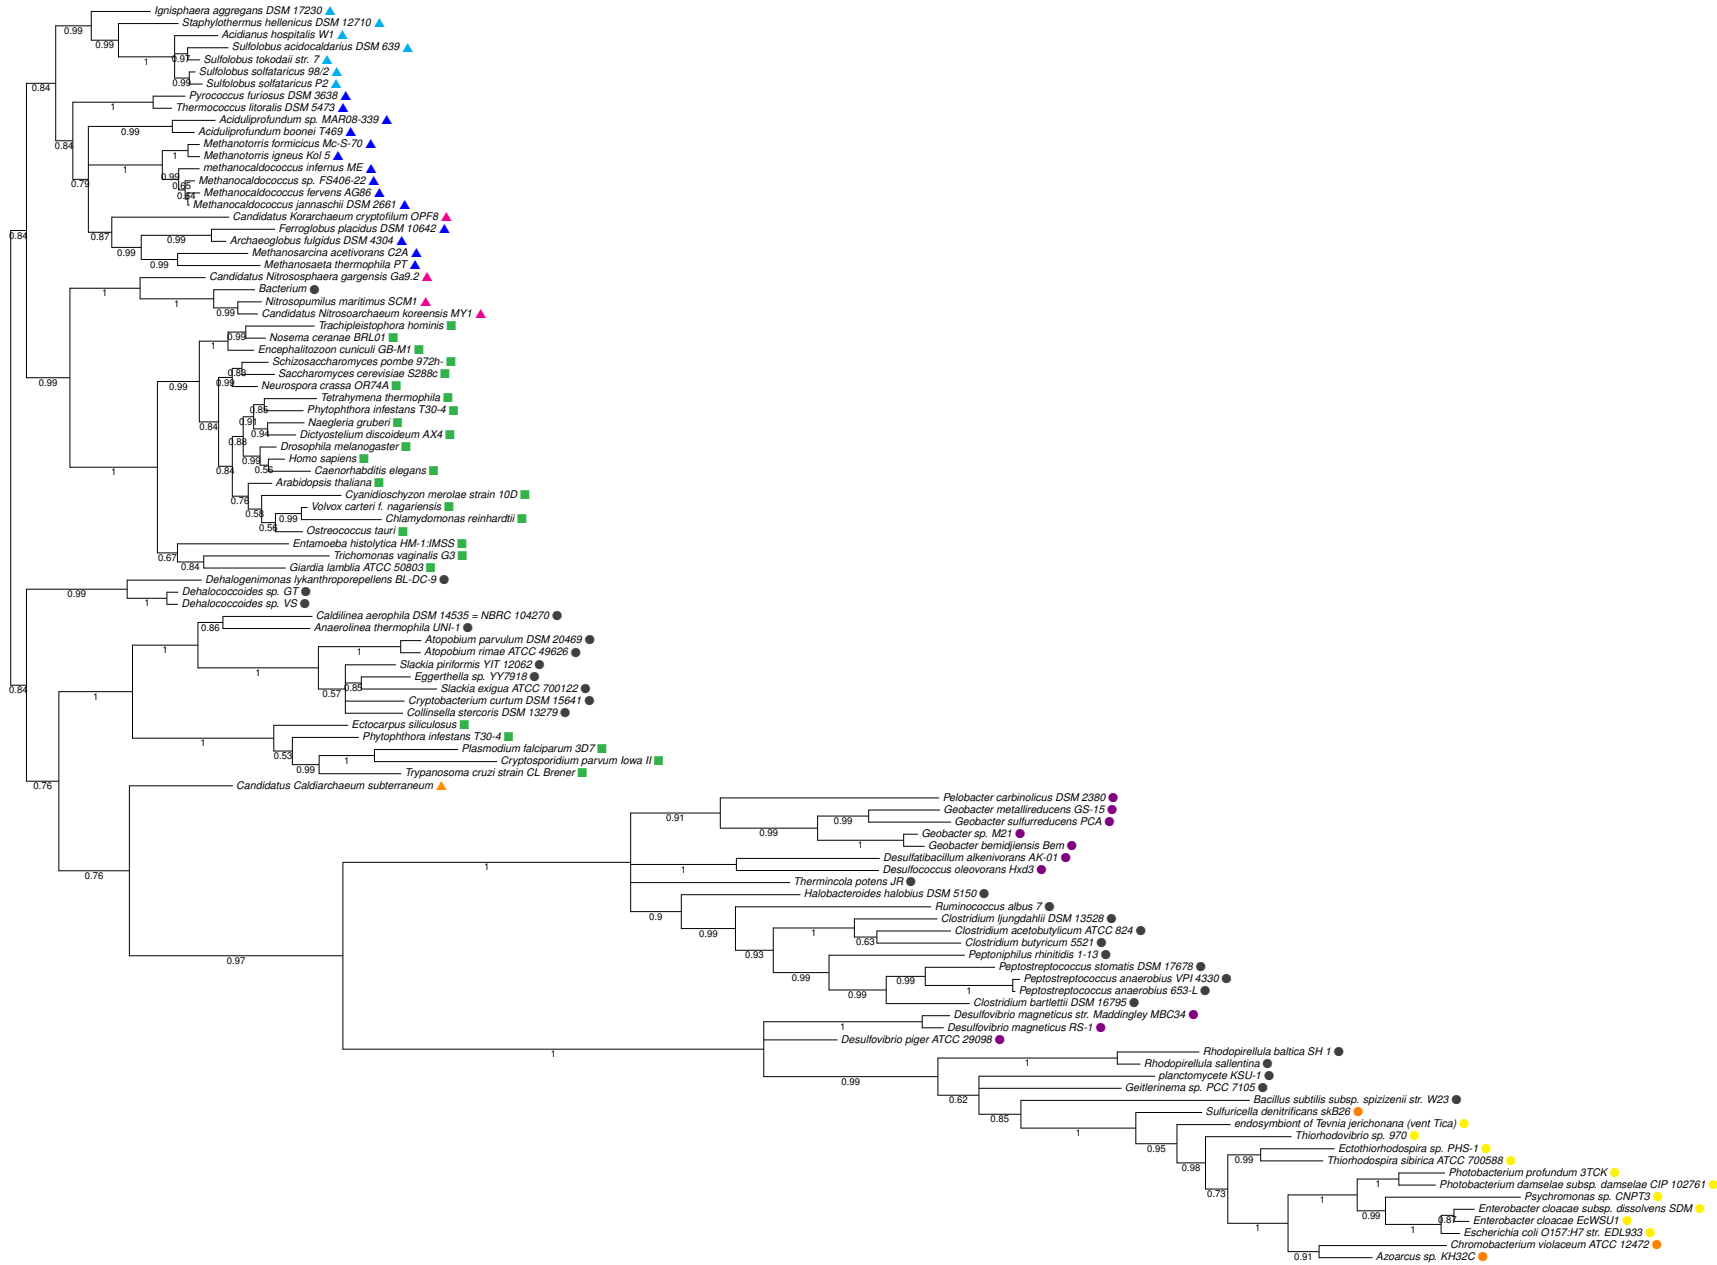

# Ntg1

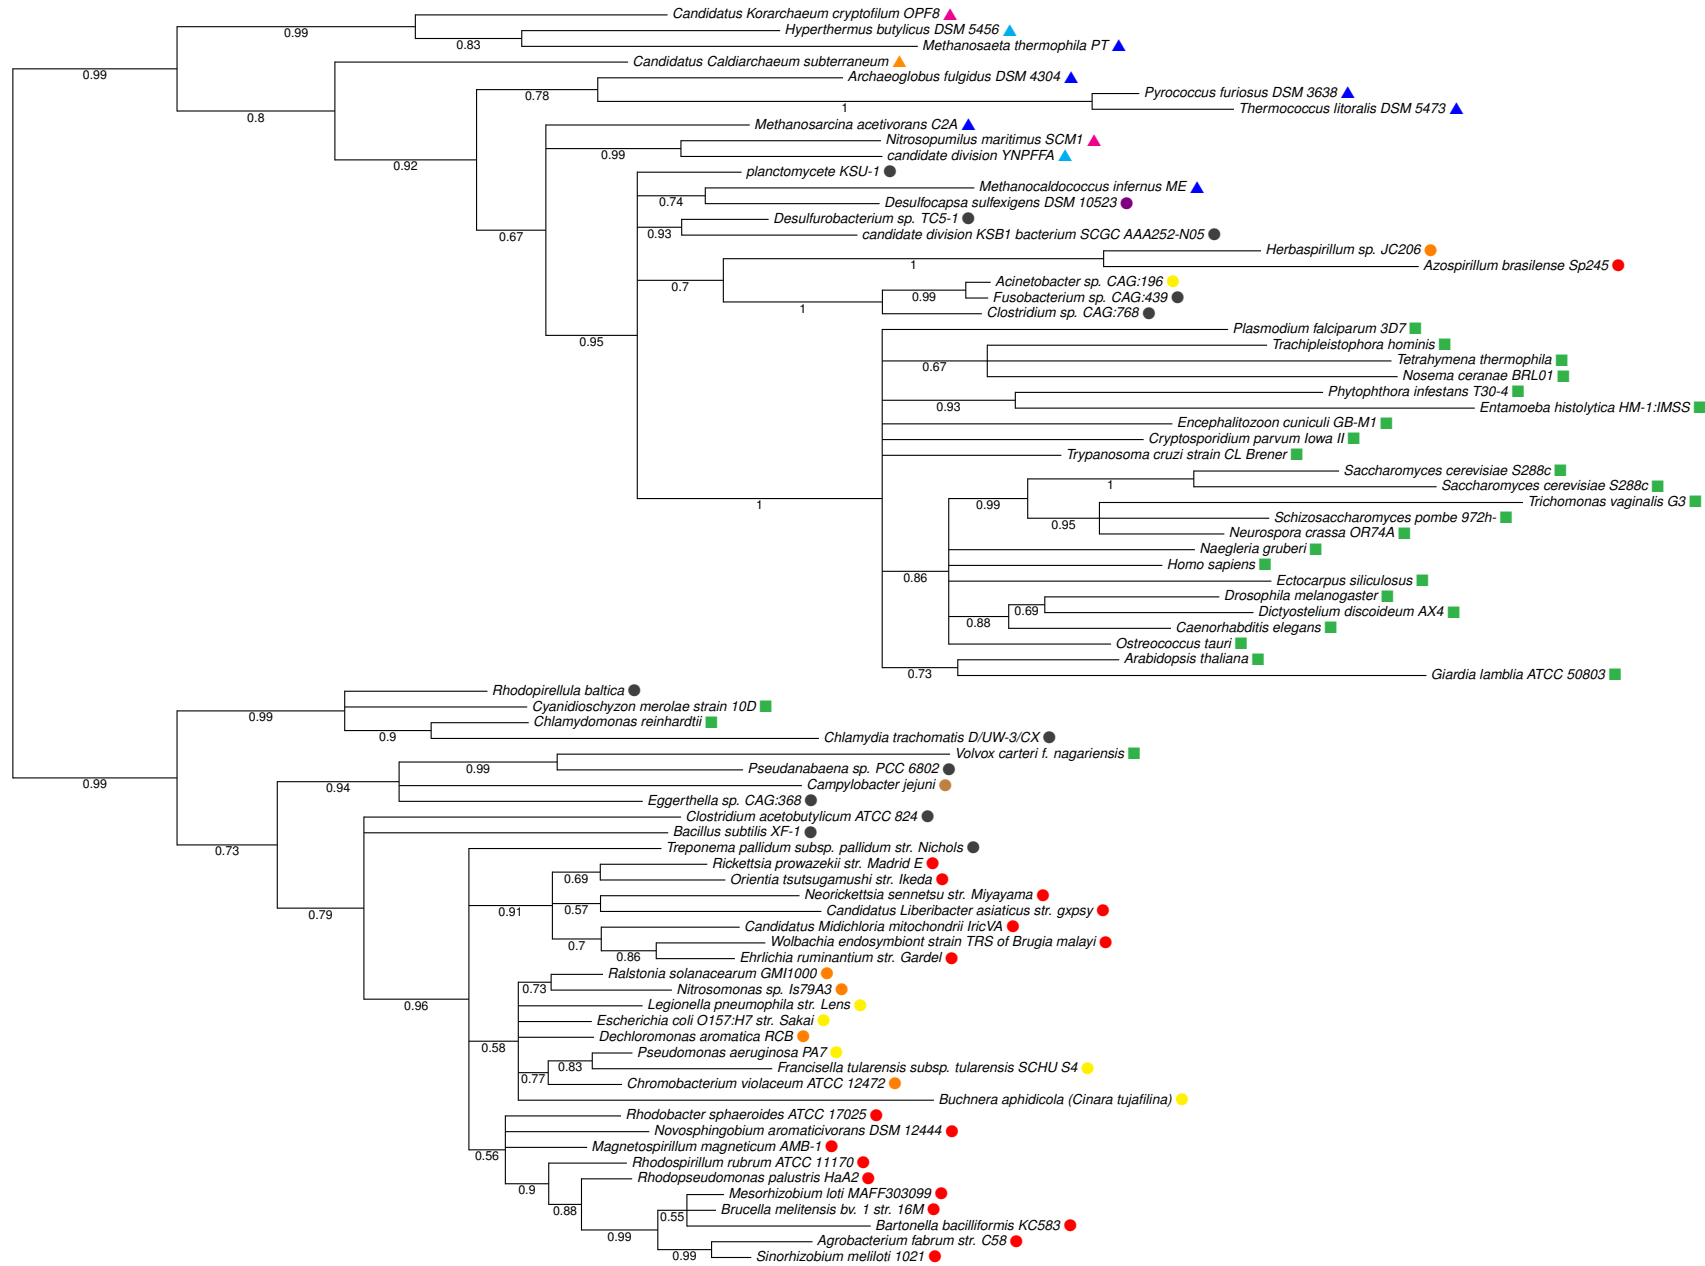

0.2

# Rad3/Chl1/Rtel1

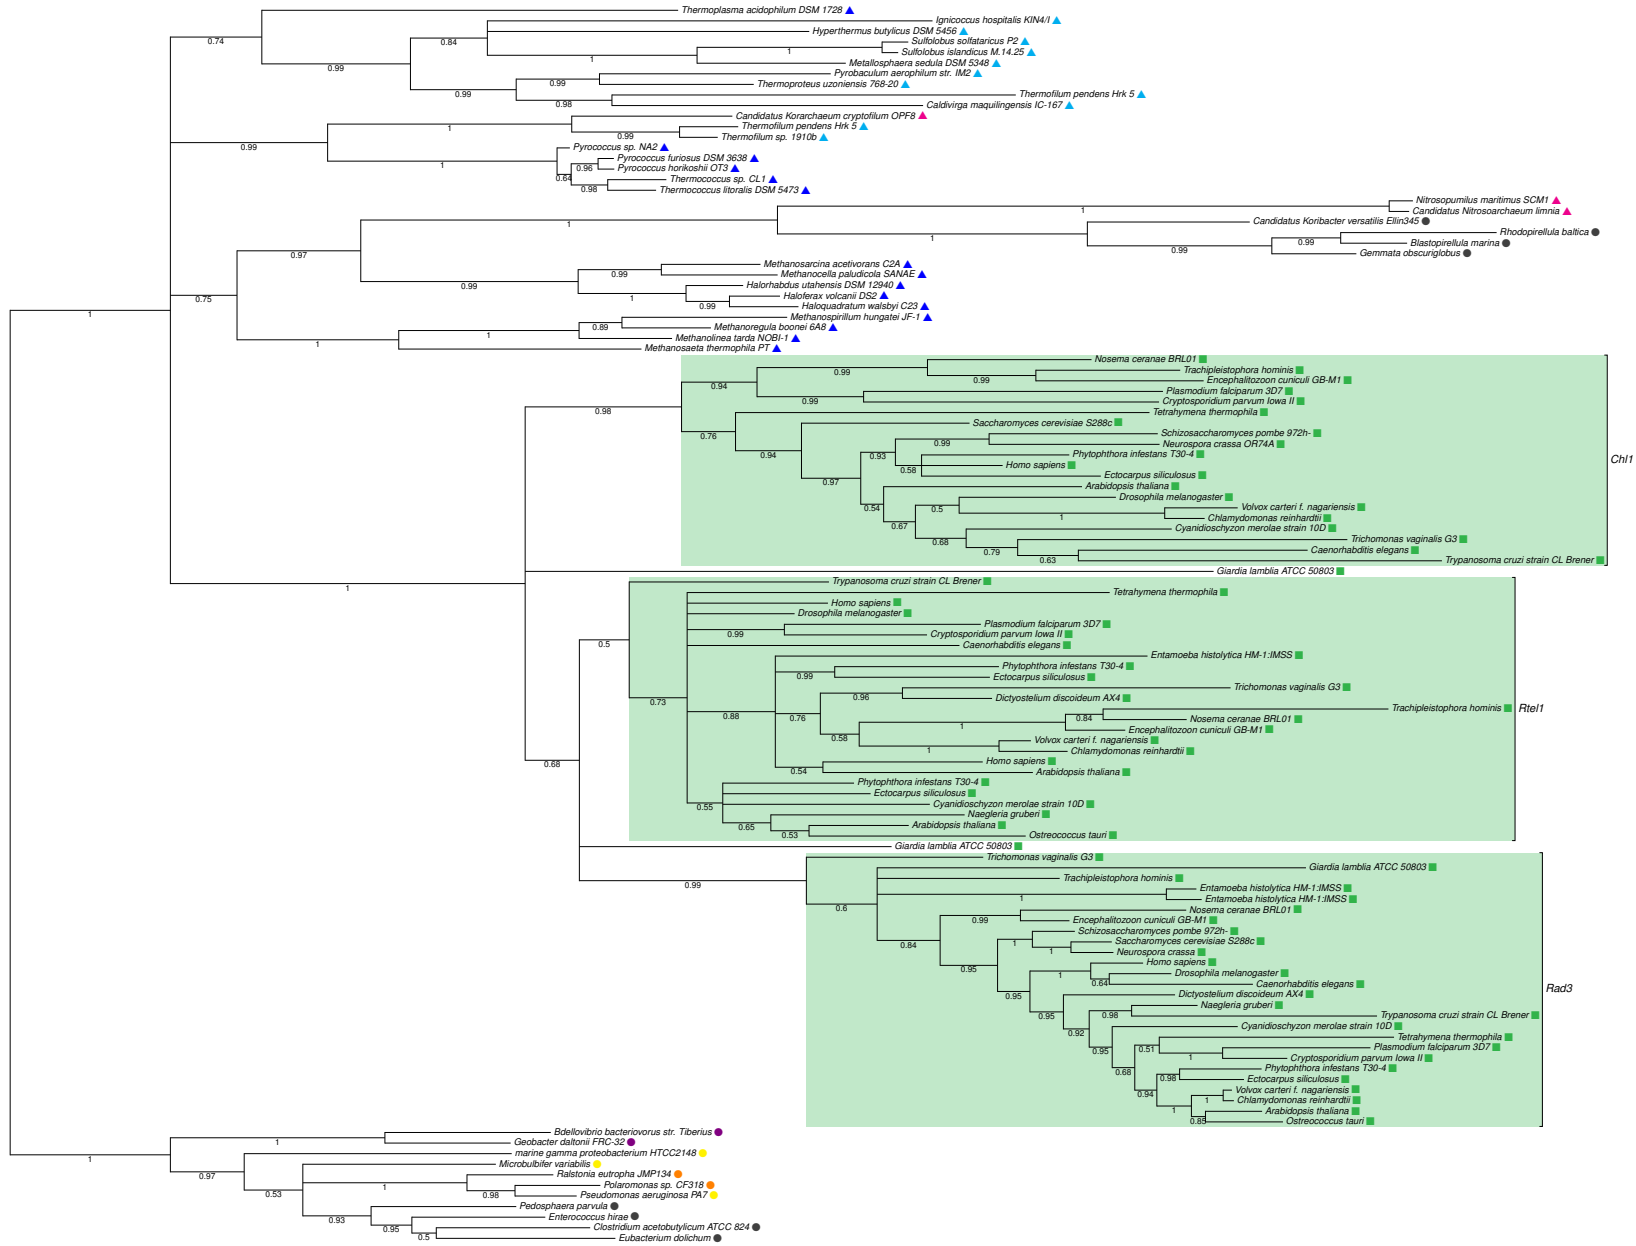

## Dna2

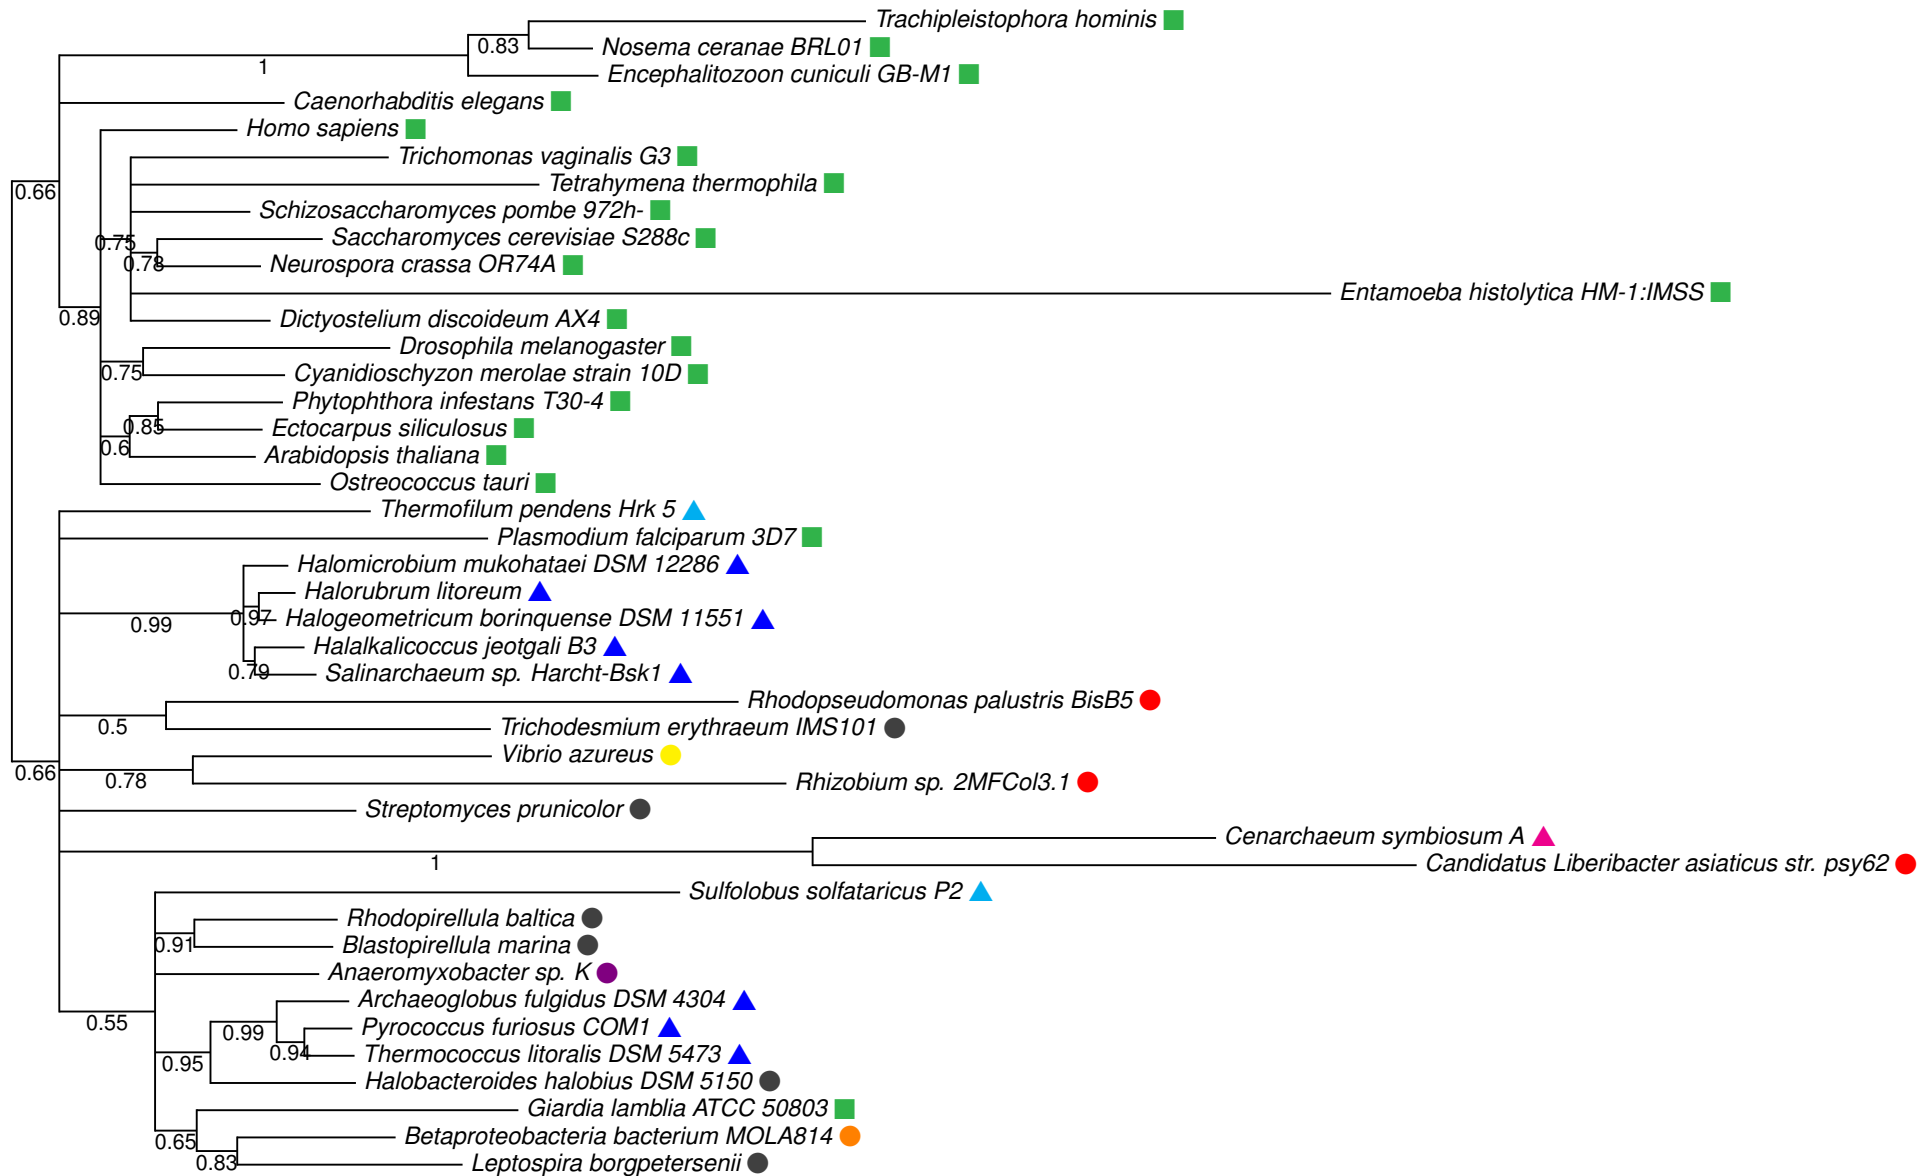

0.2

Although this tree is poorly resolved, the best BLAST hits of eukaryotic Dna2 are to sequences from the Haloarchaea; this is perhaps consistent with an archaeal origin for this gene, given the presence of good homologues in these and other Euryarchaeota. The *Giardia* and *Plasmodium* sequences included here are the most likely Dna2 candidates in these species, although the tree topology weakly excludes them from the otherwise monophyletic eukaryotic clade.

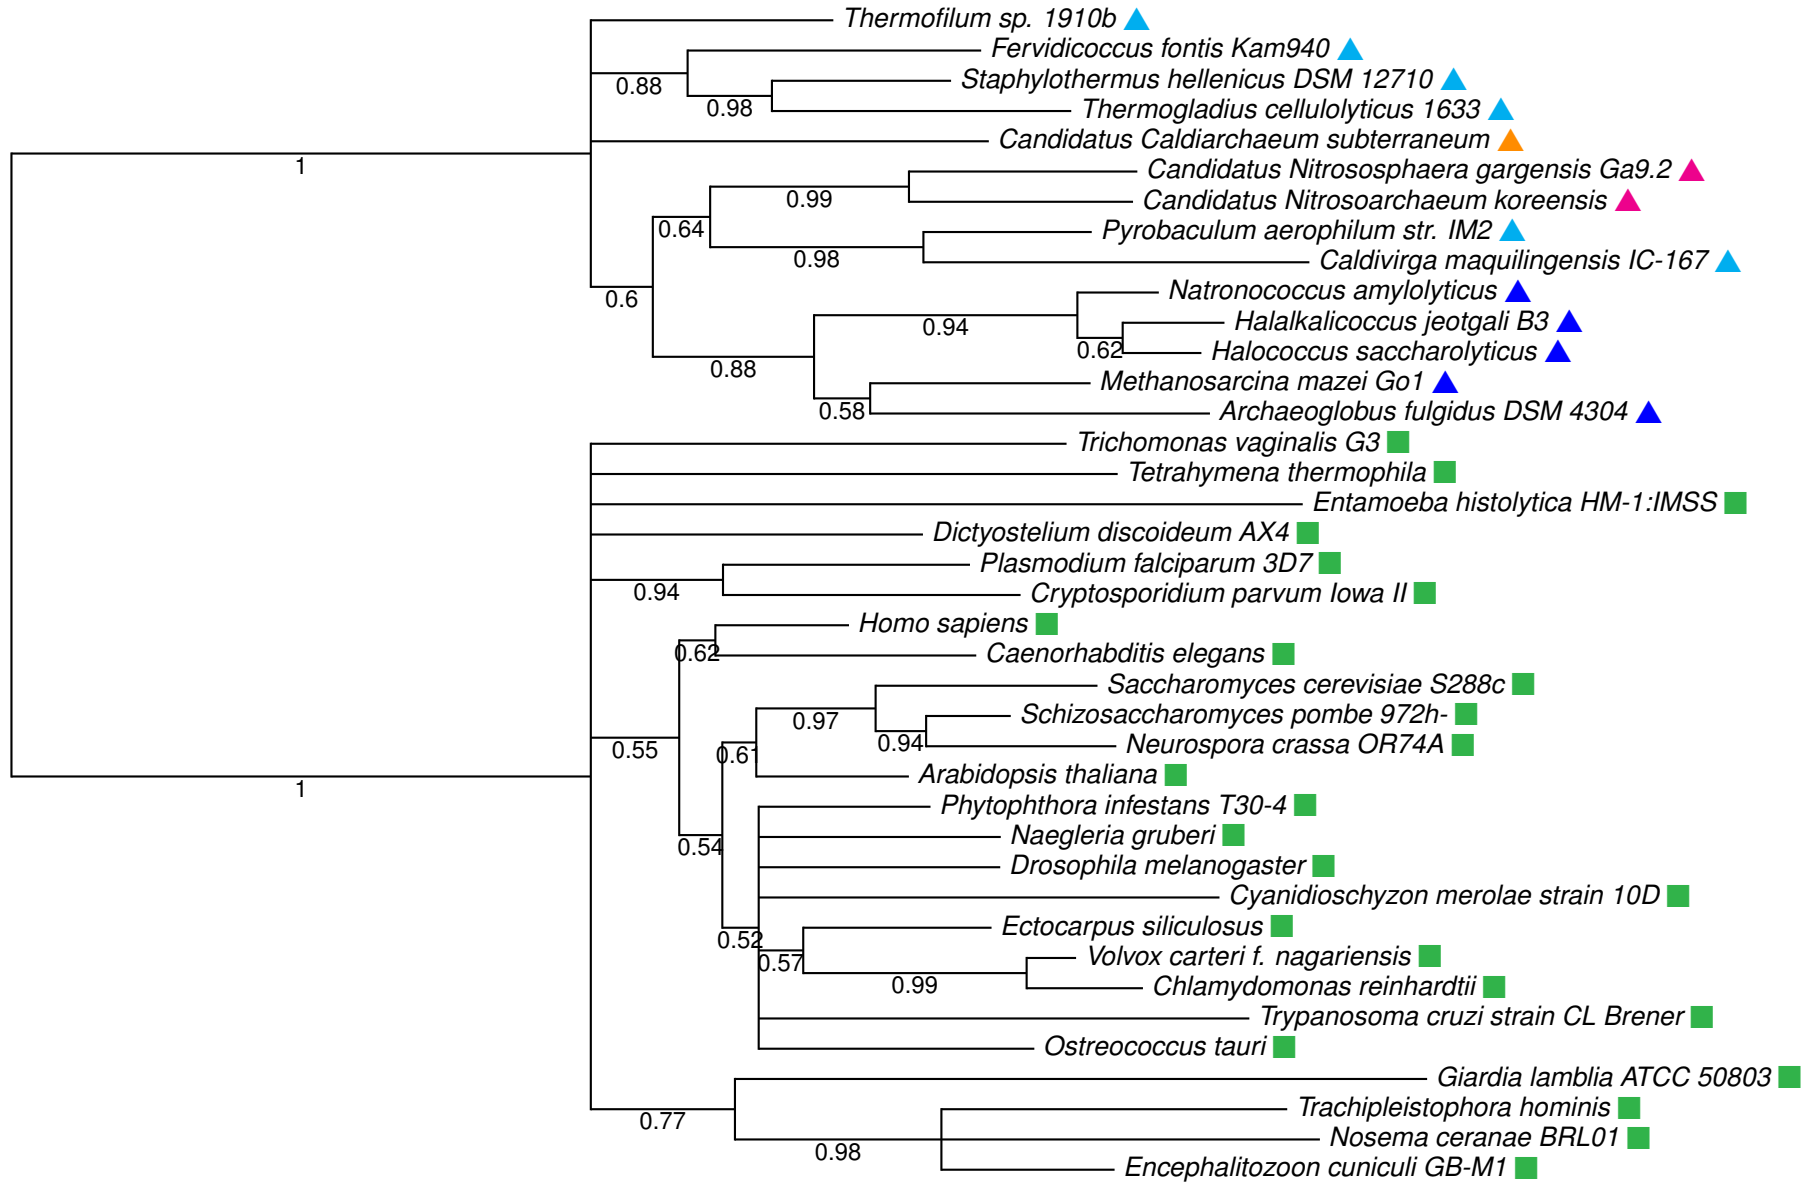

0.2

# B-family DNA polymerases

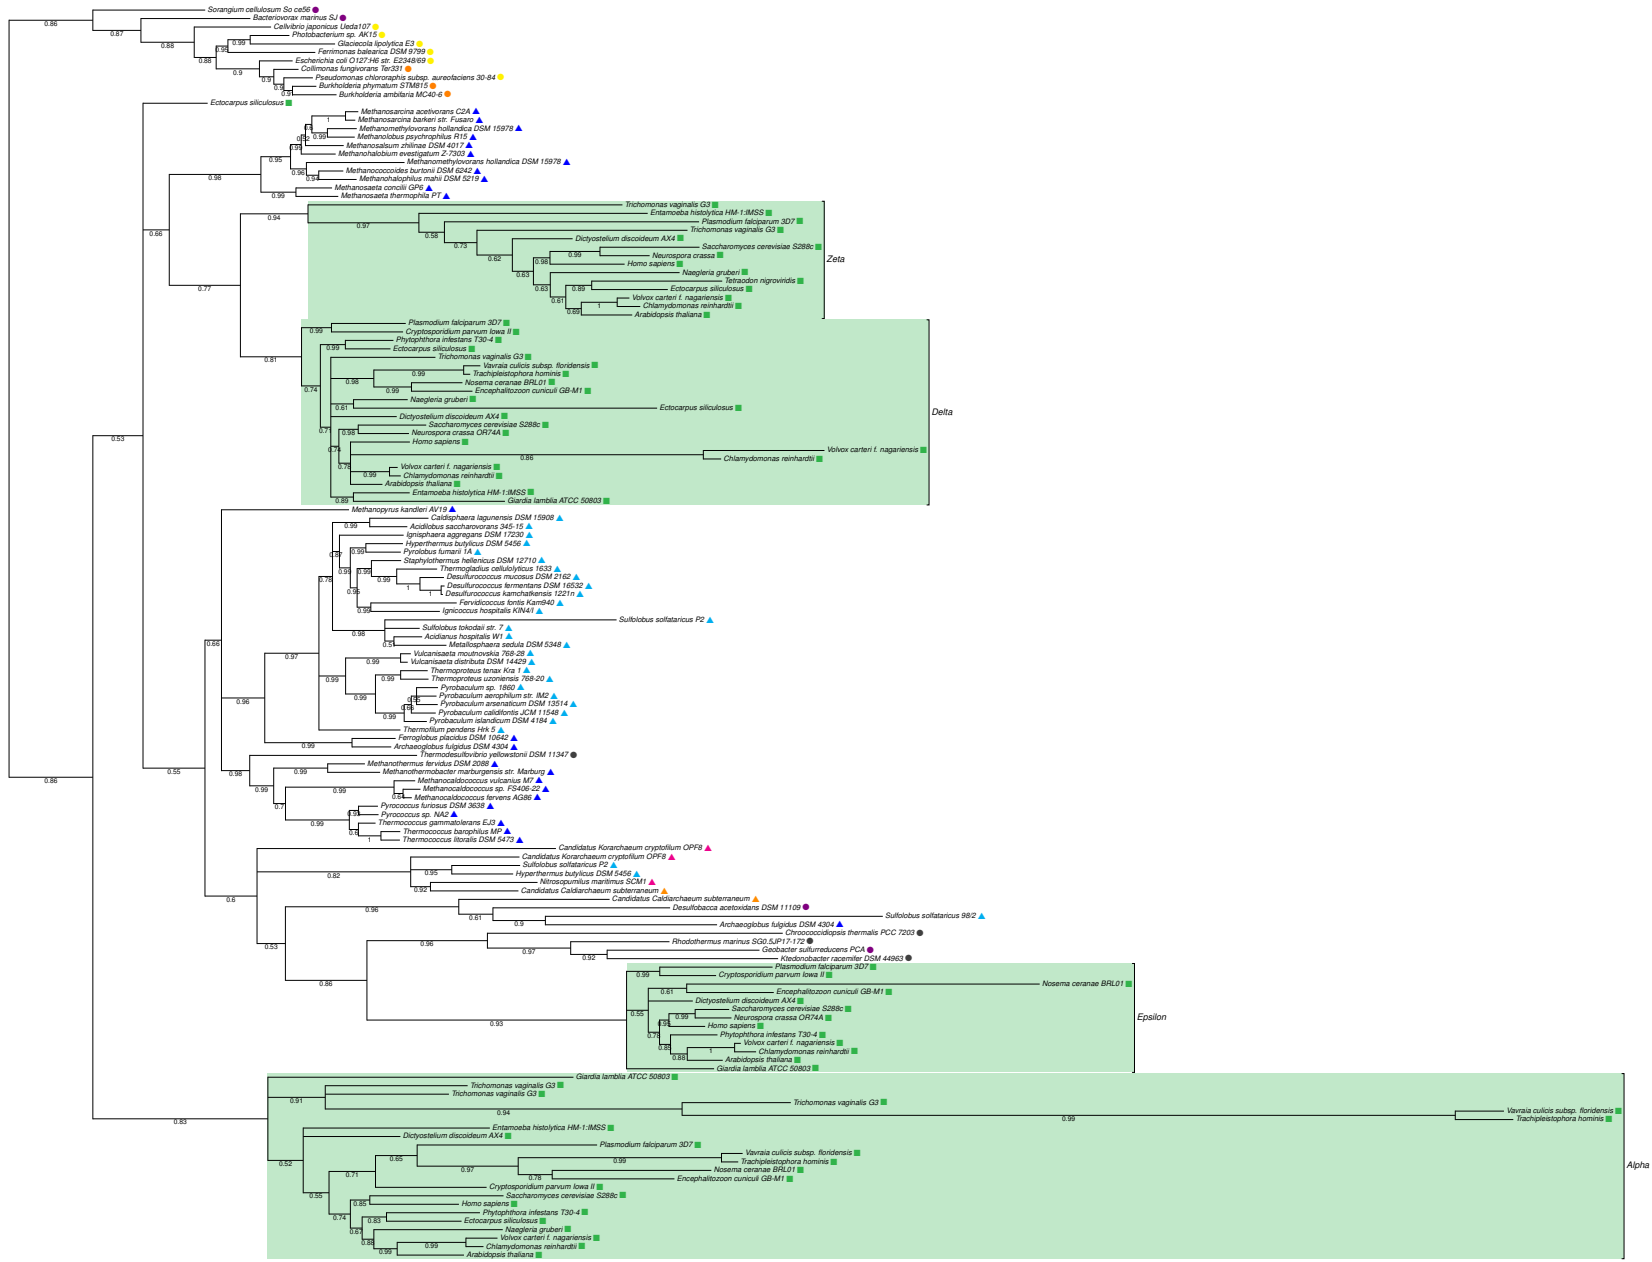

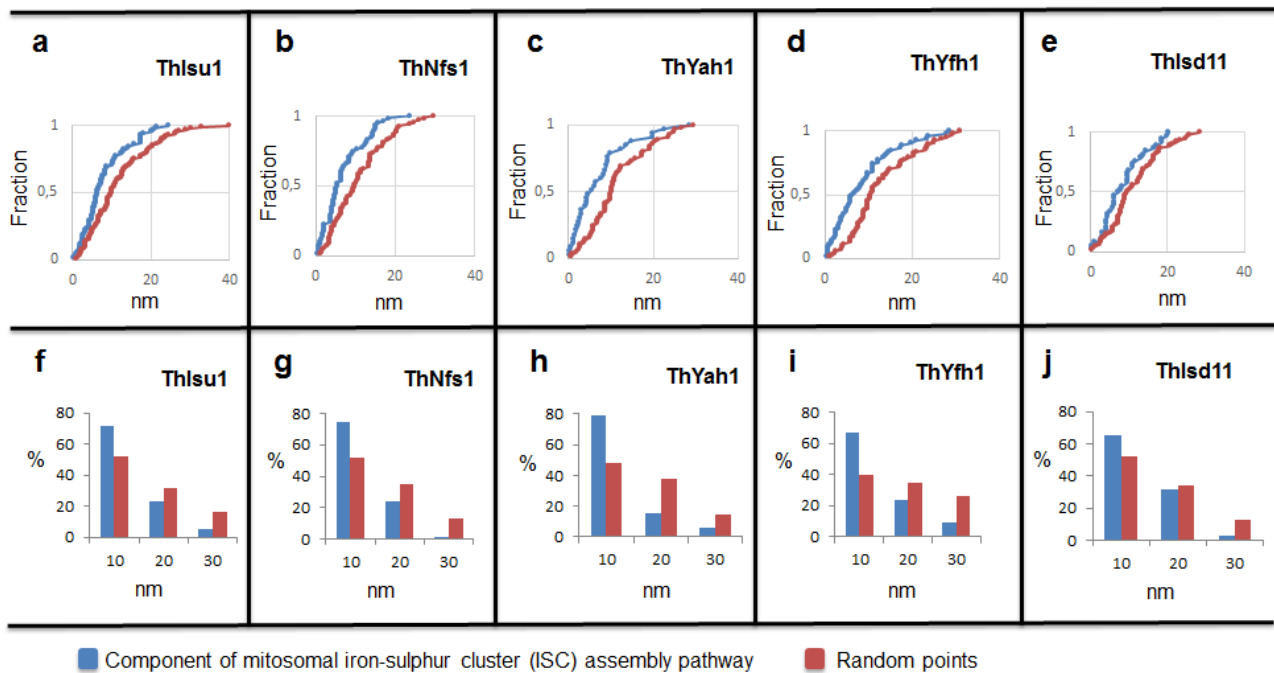

### Supplementary Figure 3. Quantitative analysis of immunogold labelling for iron-sulphur cluster (ISC) assembly components over the mitosome matrix.

Distribution of immunogold labelling over mitosome matrix profiles as compared to a similar number of random points (analysed as described in the Methods). Plots (a-e) show the cumulative fraction (Fraction) of gold labelling (blue) and random points (red) plotted against the distance from the inner membrane (nm). For both Kolmogorov Smirnov tests and Mann-Whitney tests  $p < 0.01$  for (a-d) and  $p < 0.05$  for (e). The pooled data plot is shown as Fig. 1d. Plots (f-j) show the percentage gold labelling for ISC proteins in successive 10 nm bands from the inner membrane (Chi square test on frequency distributions for (f-h)  $p < 0.05$ , for (i)  $p < 0.01$ , and for (j) not significant; degrees of freedom was 2 in all cases). Compared to a random process, all tested components of the ISC pathway clearly show relative enrichment of labelling close to the mitosome inner membrane. Respective gold and random counts as follows: Thlsu1, 72/98; ThNfs1, 58/69; ThYah1 33/56; ThYfh1, 54/68 and Thlsd11, 38/62. Analyses for individual ISC proteins reveals  $p < 0.01$  for Thlsu1, ThNfs1, ThYah1, and ThYfh1, and  $p < 0.05$  for Thlsd11 in both Kolmogorov-Smirnov and Mann-Whitney tests.



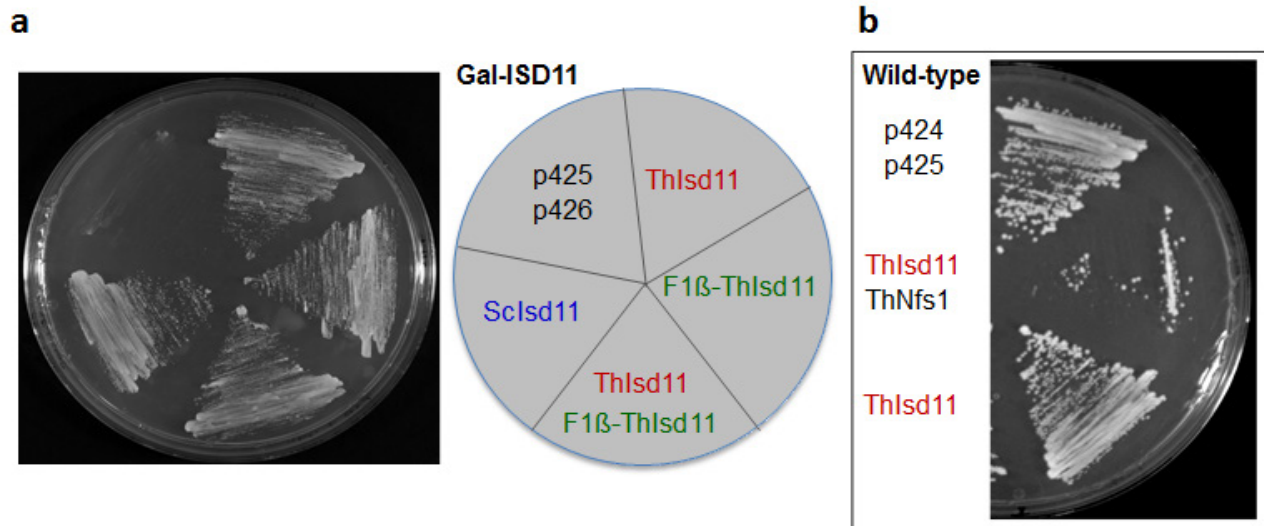

**Supplementary Figure 4. Microsporidial *Lsd11* can complement the growth defect of a yeast *Lsd11*-deficient mutant.**

**a**, *T. hominis* *Lsd11* can rescue growth of a yeast *ISD11* mutant. Gal-*ISD11* yeast cells were transformed with the plasmids p425 and p426 containing either no insert or the *ThlSD11* gene with or without a mitochondrial targeting sequence from *Neurospora crassa* F1-ATPase subunit β. As a positive control, yeast cells were transformed with the same plasmid containing yeast *ISD11*. Cells were depleted of endogenous *Lsd11* protein by growth at 30°C in minimal medium containing glucose (SD) and were spotted onto SD agar plates and grown for 2 d at 30°C. **b**, Overexpression of *Thl*sd11 in W303 wild-type cells does not affect growth but co-expression of *Thl*sd11 with *ThNfs*1 inhibits the growth of yeast cells. Wild-type cells were co-transformed with either the empty vectors p424 and p425, with the vectors containing *ThlSD11* and *ThNFS1* or with p424 containing *ThlSD11*. Cells were plated on minimal medium for three days at 30°C.

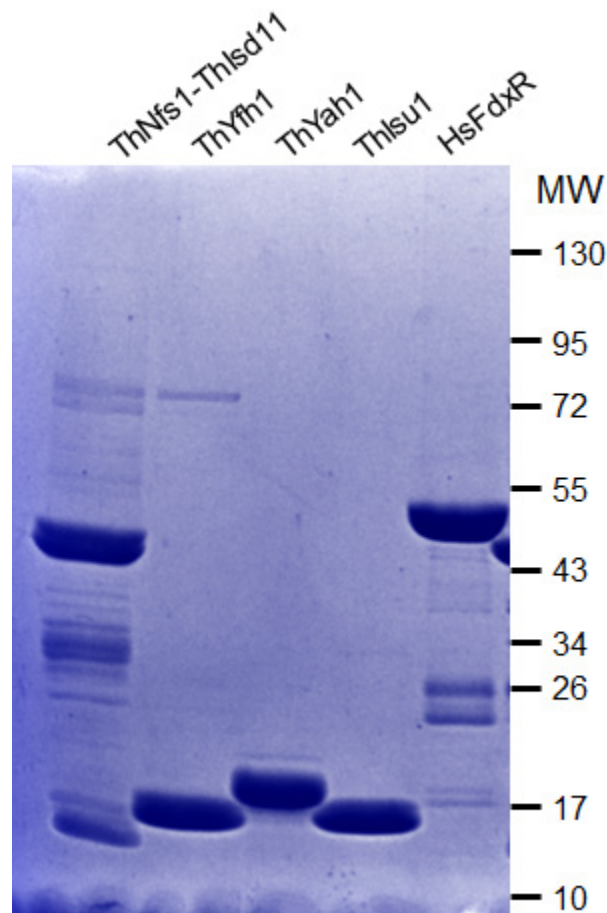

**Supplementary Figure 5. Purification of recombinant *T. hominis* mitosomal ISC proteins.**

The indicated components of the core mitosomal ISC assembly machinery from *T. hominis* were synthesised in *E. coli* and purified by Ni-NTA affinity chromatography and gel filtration (Äkta Purifier System 10, Column 16/60 Superdex 300). Aliquots were subjected to SDS-PAGE and proteins were stained using Coomassie.

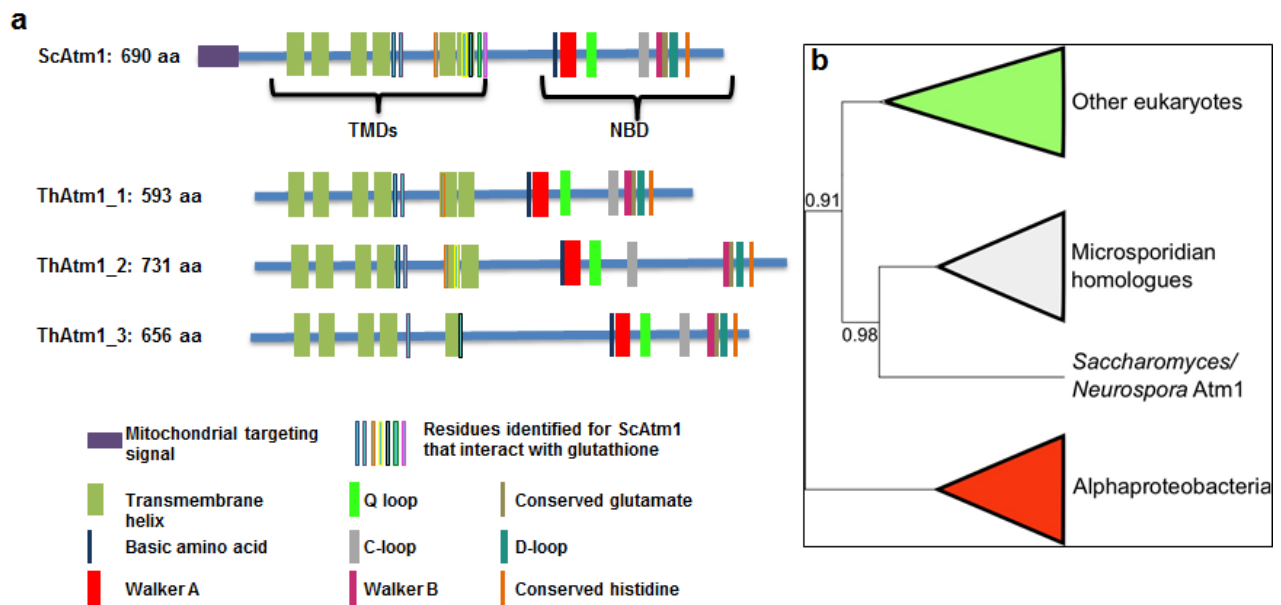

**Supplementary Figure 6. Characterization of three candidate Atm1 homologues from *T. hominis*.**

**a**, Comparison of the domain organization and sequence motifs of yeast ScAtm1 and the three best candidates for a *T. hominis* homologue. Atm1 is an ATP-binding cassette (ABC) half-transporters that contains an N-terminal mitochondrial targeting signal followed by transmembrane (TMD) and nucleotide-binding (NBD) domains<sup>17,18</sup>. The protein domain organization and key motifs mediating ATPase activity identified for ScAtm1 are conserved in all three *T. hominis* proteins (see alignment Supplementary Figure 1d). None of the *T. hominis* proteins have a predicted N-terminal mitochondrial targeting signal, but this has also been observed for *T. hominis* mitochondrial Hsp70 which is nevertheless targeted to the organelle. ThAtm1\_1 and ThAtm1\_2 also contain most of the recognized glutathione-coordinating residues<sup>25</sup>. Other conserved motifs within the NBD include the Walker A motif and the preceding conserved basic amino acid<sup>20</sup>; the Q- and C- (signature) loops which are part of the ATP-binding motif<sup>22</sup>; the Walker B motif followed by a glutamate residue which acts as a catalytic base<sup>18</sup>; the D-loop which interacts with the Walker A motif<sup>23</sup>, and a conserved histidine that is proposed to be involved in the catalytic reaction<sup>24</sup>. The TMDs were predicted with the TOPCONS server (<http://topcons.cbr.su.se>). The presence of a mitochondrial targeting signal was investigated using MITOPROT (<http://ihg.gsf.de/ihg/mitoprot.html>). **b**, Schematic tree showing the relationship between microsporidian Atm1 homologues, ScAtm1 and reference sequences, the detailed tree itself is included in Supplementary Figure 2.

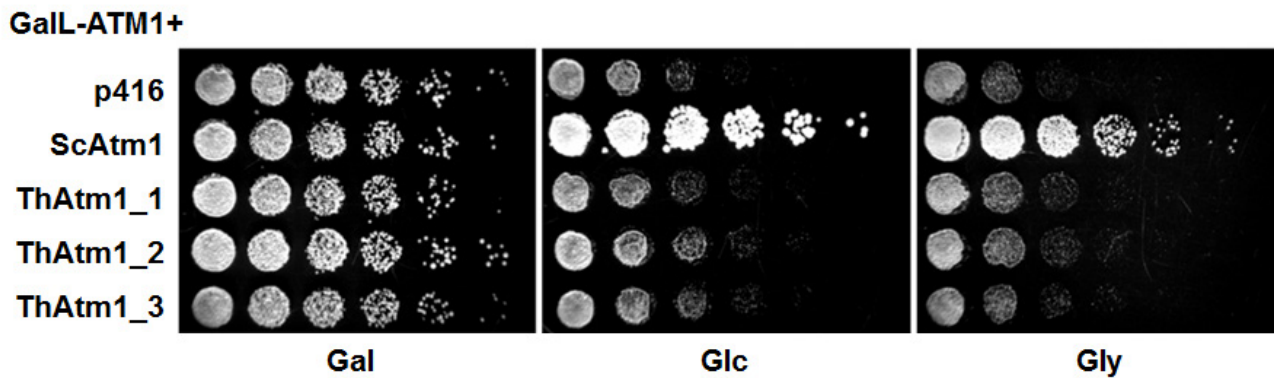

**Supplementary Figure 7. Complementation of yeast Gall-ATM1 mutant cells by candidate Atm1 homologues from *T. hominis*.** Gall-ATM1 yeast cells were transformed with vector p416-MET25 containing no gene (p416), the *S. cerevisiae* ATM1 gene (ScAtm1), or the three best candidate genes for ThAtm1. The ThAtm1 constructs included the coding information for a yeast N-terminal mitochondrial targeting signal. Cells were depleted of nuclear-encoded Atm1 by growth for 32 h at 30°C in minimal medium containing glucose. Serial tenfold dilutions were spotted onto minimal medium agar plates containing the indicated carbon sources, and growth was continued for 2 d at 30°C. Gal, galactose; Glc, glucose; Gly, glycerol.

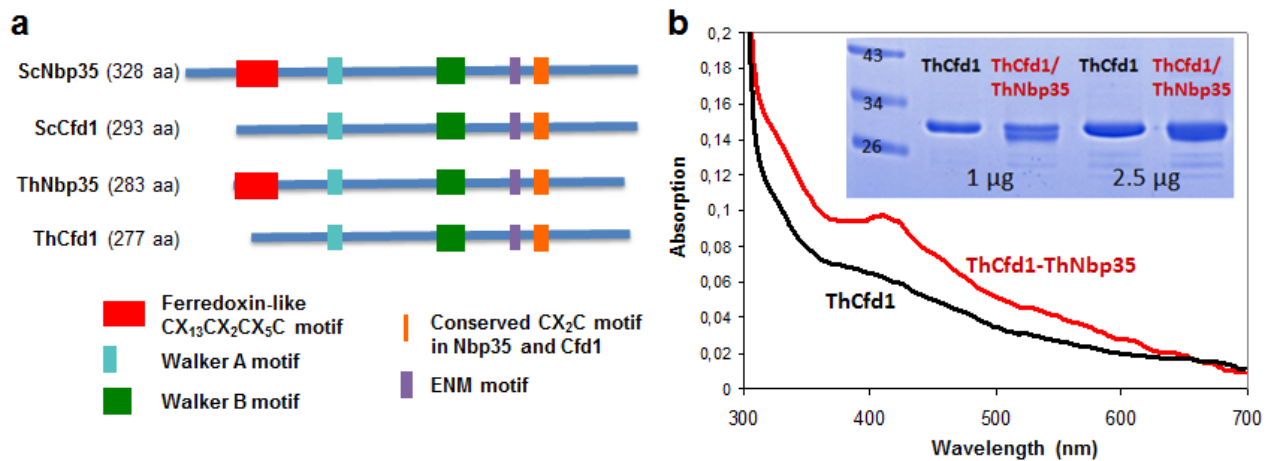

**Supplementary Figure 8. Domain organization of microsporidian Cfd1 and Nbp35 homologues and chemical reconstitution.** **a**, Conserved domain organization and sequence motifs in yeast and microsporidian Nbp35 and Cfd1 protein sequences. Yeast Nbp35 binds a [4Fe-4S] cluster to the ferredoxin-like CX<sub>13</sub>CX<sub>2</sub>CX<sub>5</sub>C motif at the N-terminus. A second [4Fe-4S] cluster binds to the conserved C-terminal CX<sub>2</sub>C motif present in both Nbp35 and Cfd1, bridging both proteins<sup>26,28,31,32</sup>. Cfd1 and Nbp35 belong to the Mrp/NBP35 subfamily of P-loop NTPases. Nucleotide binding and/or hydrolysis is apparently critical for loading of Fe/S clusters onto the Cfd-Nbp35 complex. The important Walker A and B domains for nucleotide binding, and the conserved ENMS sequence common to members of the Mrp/NBP35 subfamily<sup>48</sup> are all conserved in the microsporidian sequences. **b**, A [4Fe-4S] cluster can be biochemically reconstituted on the *T. hominis* Cfd1-Nbp35 scaffold *in vitro*. *T. hominis* ThCfd1 or both ThCfd1 and ThNbp35 were purified after expression in *E. coli* and used for chemical reconstitution of a [4Fe-4S] cluster as measured by UV-Vis spectroscopy. The peak around 420 nm indicates the efficient formation of a [4Fe-4S] cluster on the ThCfd1-ThNbp35 complex.

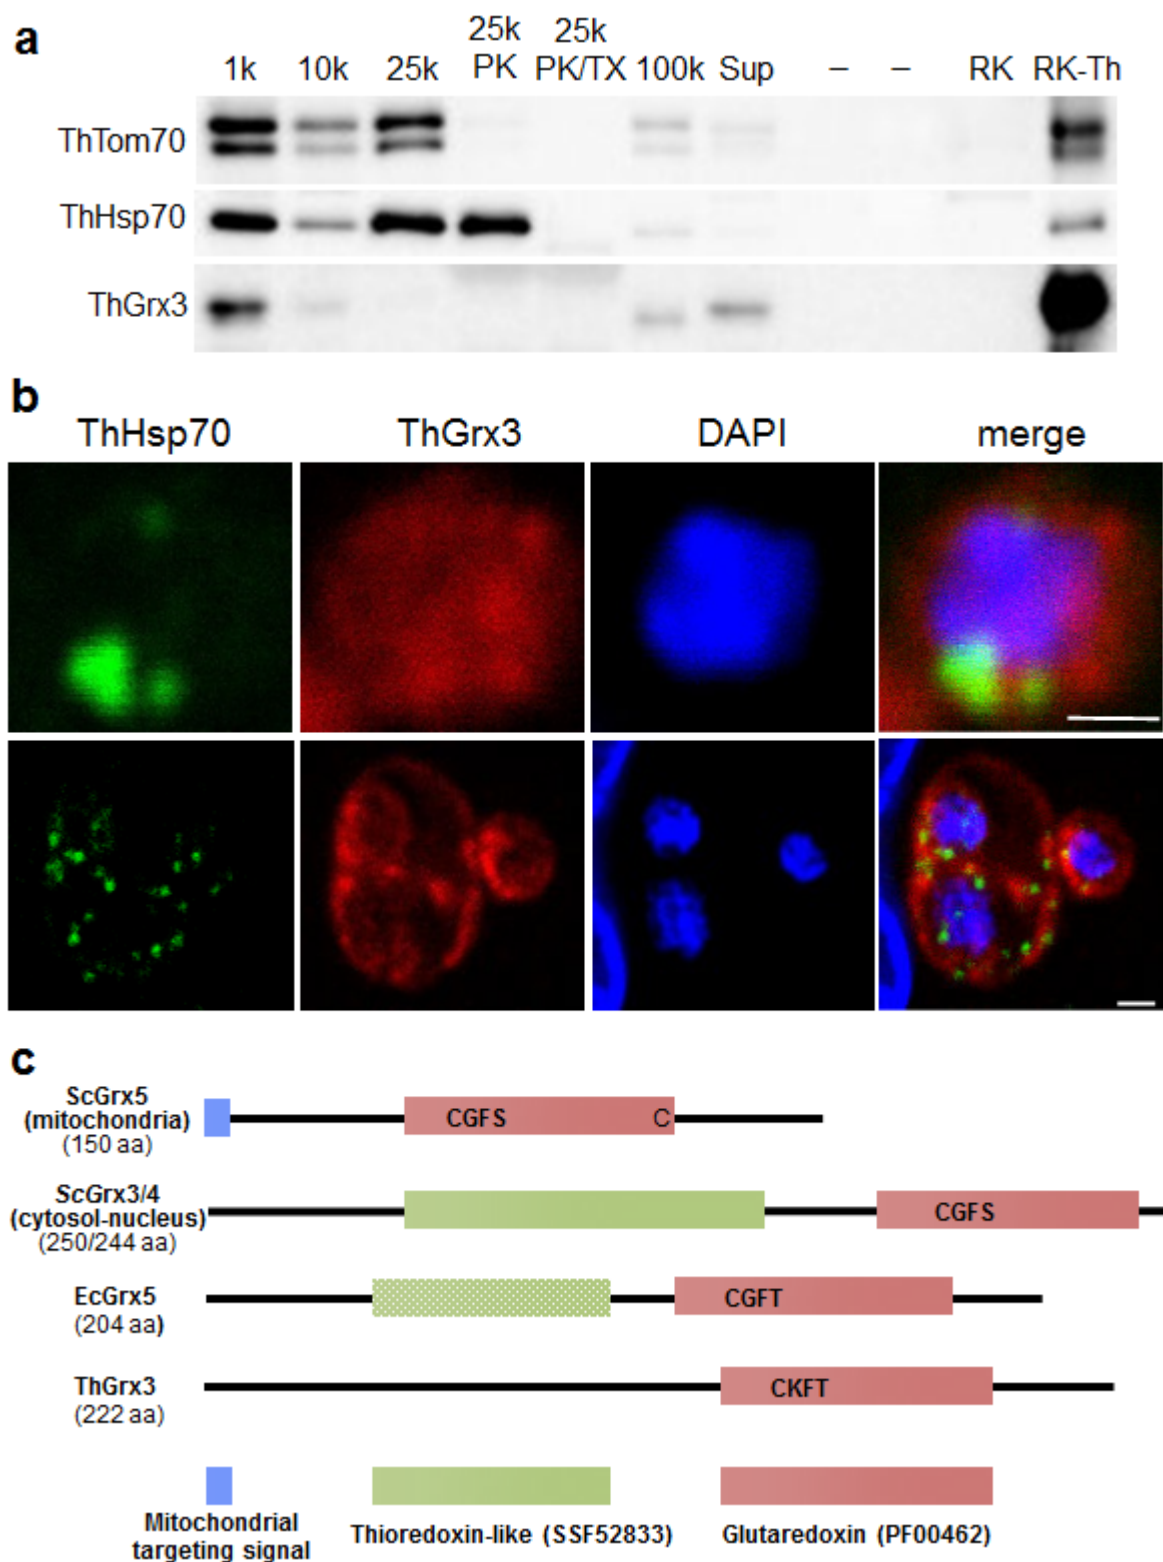

**Supplementary Figure 9. Cellular localization and domain organization of the *T. hominis* Grx3 homologue.** **a**, Western blots using antibodies to *T. hominis* proteins with fractions obtained by differential centrifugation from RK cells or RK cells infected with *T. hominis* (RK-Th). Centrifugation speeds for pellet fractions are given above each lane. Sup = final 100 K supernatant. 25 K fractions were treated with proteinase K (PK) and Triton X-100 detergent (PK-TX) as indicated.

**b**, Immunofluorescence microscopy of paraformaldehyde-fixed (2.5% PFA in PBS at room temperature for 10 min followed by permeabilization in 0.2% Triton X-100 in PBS for 10 min, top row) or methanol:acetone-fixed (1:1 at -20°C for 10 min, bottom row) RK cells infected with *T. hominis* (Th) using a rat antibody to *T. hominis* mitochondrial Hsp70 (ThHsp70, green), and a rabbit antibody to the *T. hominis* candidate Grx3 (ThGrx3, red). DAPI (blue) was used to label host and parasite nuclear DNA. Merged images are shown on the right. Scale bars correspond to 2 µm. **c**, Comparison of the domain organization between the *S. cerevisiae* monothiol glutaredoxins Grx5 of mitochondria, Grx3-Grx4 of the cytosol-nucleus, and the glutaredoxins from *E. cuniculi* and *T. hominis*. Yeast Grx3, Grx4 and Grx5 contain a glutaredoxin (Grx) domain with the active site motif CGFS<sup>49</sup>. The Grx domain is present in both microsporidial proteins. Grx3-Grx4 additionally possess an N-terminal thioredoxin-like (Trx) domain with a conserved sequence (WAEPC) similar to the thioredoxin active site motif (WCGPC). The Grx proteins from both *E. cuniculi* (previously designated EcGrx5<sup>50</sup>) and *T. hominis* (annotated here as ThGrx3; see below) are longer than ScGrx5. EcGrx5 contains a divergent, N-terminally truncated Trx domain lacking a WAEPC-like sequence (dotted green domain; detected using the SSF52833 profile and InterProScan 4.8<sup>51</sup>). The ThGrx3 N terminus is 40% identical to the corresponding *E. cuniculi* domain, but a similarity to the Trx domain was not detectable upon sequence comparison.

**Supplementary Table 1: Conservation of the machinery for Fe/S protein biogenesis and for nuclear and cytosolic Fe/S proteins in *Encephalitozoon cuniculi* and *Trachipleistophora hominis* and representative eukaryotes with mitochondria, mitosomes or hydrogenosomes.**

|                                                                        |                                                | Organelle type |               |    |       |           |           |    |             |        |    |    |
|------------------------------------------------------------------------|------------------------------------------------|----------------|---------------|----|-------|-----------|-----------|----|-------------|--------|----|----|
|                                                                        |                                                | MT             | MS            |    | MT    | MS        |           | HY | MS          | MT     |    |    |
|                                                                        |                                                | Ascomycota     | Microsporidia |    | Human | Amoebozoa | Excavates |    | Apicomplexa | Plants |    |    |
|                                                                        |                                                | Sc             | Ec            | Th | Hs    | Dd        | Eh        | Gl | Tv          | Cp     | Pf | At |
| Gene                                                                   | Description                                    | Sc             | Ec            | Th | Hs    | Dd        | Eh        | Gl | Tv          | Cp     | Pf | At |
| Components of the core mitochondrial ISC assembly machinery            | ISU1, ISU2                                     |                |               |    |       |           |           |    |             |        |    |    |
|                                                                        | NFS1                                           |                |               |    |       |           |           |    |             |        |    |    |
|                                                                        | NIFU                                           |                |               |    |       |           |           |    |             |        |    |    |
|                                                                        | NIFS                                           |                |               |    |       |           |           |    |             |        |    |    |
|                                                                        | ISD11                                          |                |               |    |       |           |           |    |             |        |    |    |
|                                                                        | ARH1                                           |                |               |    |       |           |           |    |             |        |    |    |
|                                                                        | YAH1                                           |                |               |    |       |           |           |    |             |        |    |    |
|                                                                        | YFH1                                           |                |               |    |       |           |           |    |             |        |    |    |
|                                                                        | SSQ1                                           |                |               |    |       |           |           |    |             |        |    |    |
|                                                                        | JAC1                                           |                |               |    |       |           |           |    |             |        |    |    |
|                                                                        | MGE1                                           |                |               |    |       |           |           |    |             |        |    |    |
|                                                                        | GRX5                                           |                |               |    |       |           |           |    |             |        |    |    |
|                                                                        | Maturation of mitochondrial [4Fe-4S] proteins  | IBA57          |               |    |       |           |           |    |             |        |    |    |
| ISA1                                                                   |                                                |                |               |    |       |           |           |    |             |        |    |    |
| ISA2                                                                   |                                                |                |               |    |       |           |           |    |             |        |    |    |
| NFU1                                                                   |                                                |                |               |    |       |           |           |    |             |        |    |    |
| BOL3                                                                   |                                                |                |               |    |       |           |           |    |             |        |    |    |
| IND1                                                                   |                                                |                |               |    |       |           |           |    |             |        |    |    |
| Export                                                                 | ATM1                                           |                |               |    |       |           |           |    |             |        |    |    |
|                                                                        | ERV1                                           |                |               |    |       |           |           |    |             |        |    |    |
| Components of the core cytosolic Fe/S cluster assembly machinery (CIA) | TAH18                                          |                |               |    |       |           |           |    |             |        |    |    |
|                                                                        | DRE2*                                          |                |               |    |       |           |           |    |             |        |    |    |
|                                                                        | CFD1, NBP35*                                   |                |               |    |       |           |           |    |             |        |    |    |
|                                                                        | NAR1*                                          |                |               |    |       |           |           |    |             |        |    |    |
|                                                                        | GRX3                                           |                |               |    |       |           |           |    |             |        |    |    |
|                                                                        | CIA1                                           |                |               |    |       |           |           |    |             |        |    |    |
|                                                                        | CIA2/ MIP18                                    |                |               |    |       |           |           |    |             |        |    |    |
|                                                                        | MMS19/ MET18                                   |                |               |    |       |           |           |    |             |        |    |    |
|                                                                        | YAE1                                           |                |               |    |       |           |           |    |             |        |    |    |
|                                                                        | LTO1                                           |                |               |    |       |           |           |    |             |        |    |    |
|                                                                        | Nuclear and cytosolic Fe/S containing proteins | RLI1           |               |    |       |           |           |    |             |        |    |    |
| PPAT/ GPAT/ CAB4                                                       |                                                |                |               |    |       |           |           |    |             |        |    |    |
| ELP3                                                                   |                                                |                |               |    |       |           |           |    |             |        |    |    |
| NTG1, NTG2                                                             |                                                |                |               |    |       |           |           |    |             |        |    |    |
| RAD3                                                                   |                                                |                |               |    |       |           |           |    |             |        |    |    |
| CHL1                                                                   |                                                |                |               |    |       |           |           |    |             |        |    |    |
| DNA2                                                                   |                                                |                |               |    |       |           |           |    |             |        |    |    |
| RTEL1                                                                  |                                                |                |               |    |       |           |           |    |             |        |    |    |
| PRI2                                                                   |                                                |                |               |    |       |           |           |    |             |        |    |    |
| POL1                                                                   |                                                |                |               |    |       |           |           |    |             |        |    |    |
| POL2                                                                   |                                                |                |               |    |       |           |           |    |             |        |    |    |
| POL3                                                                   |                                                |                |               |    |       |           |           |    |             |        |    |    |

Mitochondrial/Mitosomal ISC pathway
  Cytosolic Fe/S protein assembly
  Nuclear and cytosolic Fe/S proteins

\* denotes components of the Fe/S biogenesis pathways that are Fe/S proteins themselves.

Key: Sc: *S. cerevisiae*; Ec: *E. cuniculi*; Th: *T. hominis*; Hs: *H. sapiens*; Dd: *D. discoideum*; Eh: *E. histolytica*; Gl: *G. lamblia*; Tv: *T. vaginalis*; Cp: *C. parvum*; Pf: *P. falciparum*; At: *A. thaliana*. MT: mitochondria; MS: mitosomes; HY: hydrogenosomes.



**Supplementary Table 2. Functional complementation of yeast ISC and CIA depletion cells by *Trachipleistophora hominis* genes**

|                                                                        | <i>T. hominis</i> gene | Complementation in yeast        | Source of data                             |
|------------------------------------------------------------------------|------------------------|---------------------------------|--------------------------------------------|
| Components of the core mitochondrial ISC assembly machinery            | ISU1                   | Yes                             | Goldberg et al. 2008 (Ref. 50)             |
|                                                                        | NFS1                   | No                              | Goldberg et al. 2008 (Ref. 50)             |
|                                                                        | HSP70                  | No (dominant negative in yeast) | Goldberg et al. 2008 (Ref. 50)             |
|                                                                        | YFH1                   | No                              | Goldberg et al. 2008 (Ref. 50); this study |
|                                                                        | ISD11                  | Yes                             | This study                                 |
|                                                                        | NFS1+ISD11             | No (dominant negative in yeast) | This study                                 |
|                                                                        | ARH1                   | No                              | This study                                 |
|                                                                        | YAH1                   | No                              | This study                                 |
|                                                                        | ARH1+YAH1              | No                              | This study                                 |
|                                                                        | GRX3                   | No complementation of Grx5      | This study                                 |
|                                                                        | ATM1_1                 | No                              | This study                                 |
|                                                                        | ATM1_2                 | No                              | This study                                 |
|                                                                        | ATM1_3                 | No                              | This study                                 |
| Components of the core cytosolic Fe/S cluster assembly machinery (CIA) | CFD1                   | No                              | This study                                 |
|                                                                        | NBP35                  | No                              | This study                                 |
|                                                                        | CFD1+NBP35             | No                              | This study                                 |
|                                                                        | NAR1                   | No                              | This study                                 |
|                                                                        | CIA1                   | No                              | This study                                 |

## Supplementary References:

- 1 Ziegler, G. A. & Schulz, G. E. Crystal structures of adrenodoxin reductase in complex with NADP<sup>+</sup> and NADPH suggesting a mechanism for the electron transfer of an enzyme family. *Biochemistry* **39**, 10986-10995 (2000).
- 2 Ziegler, G. A., Vornrhein, C., Hanukoglu, I. & Schulz, G. E. The structure of adrenodoxin reductase of mitochondrial P450 systems: electron transfer for steroid biosynthesis. *J Mol Biol* **289**, 981-990, (1999).
- 3 Aliverti, A., Pandini, V., Pennati, A., de Rosa, M. & Zanetti, G. Structural and functional diversity of ferredoxin-NADP(+) reductases. *Arch Biochem Biophys* **474**, 283-291 (2008).
- 4 Muller, J. J., Lapko, A., Bourenkov, G., Ruckpaul, K. & Heinemann, U. Adrenodoxin reductase-adrenodoxin complex structure suggests electron transfer path in steroid biosynthesis. *J Biol Chem* **276**, 2786-2789 (2001).
- 5 Brandt, M. E. & Vickery, L. E. Charge pair interactions stabilizing ferredoxin-ferredoxin reductase complexes. Identification by complementary site-specific mutations. *J Biol Chem* **268**, 17126-17130 (1993).
- 6 Vickery, L. E. Molecular recognition and electron transfer in mitochondrial steroid hydroxylase systems. *Steroids* **62**, 124-127 (1997).
- 7 Kakuta, Y., Horio, T., Takahashi, Y. & Fukuyama, K. Crystal structure of Escherichia coli Fdx, an adrenodoxin-type ferredoxin involved in the assembly of iron-sulfur clusters. *Biochemistry* **40**, 11007-11012 (2001).
- 8 Sainz, G. *et al.* Structure of a [2Fe-2S] ferredoxin from Rhodobacter capsulatus likely involved in Fe-S cluster biogenesis and conformational changes observed upon reduction. *J Biol Inorg Chem* **11**, 235-246 (2006).
- 9 Coghlan, V. M. & Vickery, L. E. Site-specific mutations in human ferredoxin that affect binding to ferredoxin reductase and cytochrome P450<sub>scc</sub>. *J Biol Chem* **266**, 18606-18612 (1991).
- 10 Iwema, T. *et al.* Structural basis for delivery of the intact [Fe<sub>2</sub>S<sub>2</sub>] cluster by monothiol glutaredoxin. *Biochemistry* **48**, 6041-6043 (2009).
- 11 Johansson, C. *et al.* The crystal structure of human GLRX5: iron-sulfur cluster co-ordination, tetrameric assembly and monomer activity. *Biochem J* **433**, 303-311 (2011).
- 12 Li, H. *et al.* The yeast iron regulatory proteins Grx3/4 and Fra2 form heterodimeric complexes containing a [2Fe-2S] cluster with cysteinyl and histidyl ligation. *Biochemistry* **48**, 9569-9581 (2009).
- 13 Picciocchi, A., Saguez, C., Boussac, A., Cassier-Chauvat, C. & Chauvat, F. CGFS-type monothiol glutaredoxins from the cyanobacterium Synechocystis PCC6803 and other evolutionary distant model organisms possess a glutathione-ligated [2Fe-2S] cluster. *Biochemistry* **46**, 15018-15026 (2007).
- 14 Belli, G. *et al.* Structure-function analysis of yeast Grx5 monothiol glutaredoxin defines essential amino acids for the function of the protein. *J Biol Chem* **277**, 37590-37596 (2002).
- 15 Soding, J., Biegert, A. & Lupas, A. N. The HHpred interactive server for protein homology detection and structure prediction. *Nucleic Acids Res* **33**, W244-248 (2005).
- 16 Marchler-Bauer, A. *et al.* CDD: NCBI's conserved domain database. *Nucleic Acids Res* **43**, D222-226 (2015).

- 17 Kispal, G., Csere, P., Prohl, C. & Lill, R. The mitochondrial proteins Atm1p and Nfs1p are essential for biogenesis of cytosolic Fe/S proteins. *Embo J* **18**, 3981-3989 (1999).
- 18 Leighton, J. & Schatz, G. An ABC transporter in the mitochondrial inner membrane is required for normal growth of yeast. *Embo J* **14**, 188-195 (1995).
- 19 Tsirigos, K. D., Peters, C., Shu, N., Kall, L. & Elofsson, A. The TOPCONS web server for consensus prediction of membrane protein topology and signal peptides. *Nucleic Acids Res* **43**, W401-407 (2015).
- 20 Chloupkova, M., Reaves, S. K., LeBard, L. M. & Koeller, D. M. The mitochondrial ABC transporter Atm1p functions as a homodimer. *FEBS Lett* **569**, 65-69 (2004).
- 21 Smith, P. C. *et al.* ATP binding to the motor domain from an ABC transporter drives formation of a nucleotide sandwich dimer. *Mol Cell* **10**, 139-149 (2002).
- 22 Schmitt, L. & Tampe, R. Structure and mechanism of ABC transporters. *Curr Opin Struct Biol* **12**, 754-760 (2002).
- 23 Hanekop, N., Zaitseva, J., Jenewein, S., Holland, I. B. & Schmitt, L. Molecular insights into the mechanism of ATP-hydrolysis by the NBD of the ABC-transporter HlyB. *FEBS Lett* **580**, 1036-1041 (2006).
- 24 Zaitseva, J., Jenewein, S., Jumpertz, T., Holland, I. B. & Schmitt, L. H662 is the linchpin of ATP hydrolysis in the nucleotide-binding domain of the ABC transporter HlyB. *Embo J* **24**, 1901-1910 (2005).
- 25 Srinivasan, V., Pierik, A. J. & Lill, R. Crystal structures of nucleotide-free and glutathione-bound mitochondrial ABC transporter Atm1. *Science* **343**, 1137-1140 (2014).
- 26 Roy, A., Solodovnikova, N., Nicholson, T., Antholine, W. & Walden, W. E. A novel eukaryotic factor for cytosolic Fe-S cluster assembly. *Embo J* **22**, 4826-4835 (2003).
- 27 Hausmann, A. *et al.* The eukaryotic P loop NTPase Nbp35: an essential component of the cytosolic and nuclear iron-sulfur protein assembly machinery. *Proceedings of the National Academy of Sciences of the United States of America* **102**, 3266-3271 (2005).
- 28 Netz, D. J. *et al.* A bridging [4Fe-4S] cluster and nucleotide binding are essential for function of the Cfd1-Nbp35 complex as a scaffold in iron-sulfur protein maturation. *J Biol Chem* **287**, 12365-12378 (2012).
- 29 Netz, D. J. *et al.* Tah18 transfers electrons to Dre2 in cytosolic iron-sulfur protein biogenesis. *Nature chemical biology* **6**, 758-765 (2010).
- 30 Tsaousis, A. D., Gentekaki, E., Eme, L., Gaston, D. & Roger, A. J. Evolution of the cytosolic iron-sulfur cluster assembly machinery in Blastocystis species and other microbial eukaryotes. *Eukaryot Cell* **13**, 143-153 (2014).
- 31 Netz, D. J., Pierik, A. J., Stumpfig, M., Muhlenhoff, U. & Lill, R. The Cfd1-Nbp35 complex acts as a scaffold for iron-sulfur protein assembly in the yeast cytosol. *Nat Chem Biol* **3**, 278-286 (2007).
- 32 Leipe, D. D., Wolf, Y. I., Koonin, E. V. & Aravind, L. Classification and evolution of P-loop GTPases and related ATPases. *J Mol Biol* **317**, 41-72 (2002).
- 33 Li, D. & Roberts, R. WD-repeat proteins: structure characteristics, biological function, and their involvement in human diseases. *Cell Mol Life Sci* **58**, 2085-2097 (2001).
- 34 Neer, E. J., Schmidt, C. J., Nambudripad, R. & Smith, T. F. The ancient regulatory-protein family of WD-repeat proteins. *Nature* **371**, 297-300 (1994).

- 35 Smith, T. F., Gaitatzes, C., Saxena, K. & Neer, E. J. The WD repeat: a common architecture for diverse functions. *Trends in biochemical sciences* **24**, 181-185 (1999).
- 36 Srinivasan, V. *et al.* Structure of the yeast WD40 domain protein Cia1, a component acting late in iron-sulfur protein biogenesis. *Structure* **15**, 1246-1257 (2007).
- 37 Weerapana, E. *et al.* Quantitative reactivity profiling predicts functional cysteines in proteomes. *Nature* **468**, 790-795 (2010).
- 38 Stehling, O. *et al.* Human CIA2A-FAM96A and CIA2B-FAM96B integrate iron homeostasis and maturation of different subsets of cytosolic-nuclear iron-sulfur proteins. *Cell Metab* **18**, 187-198 (2013).
- 39 Stehling, O. *et al.* MMS19 Assembles Iron-Sulfur Proteins Required for DNA Metabolism and Genomic Integrity. *Science* **337**, 195-199 (2012).
- 40 Horner, D. S., Heil, B., Happe, T. & Embley, T. M. Iron hydrogenases--ancient enzymes in modern eukaryotes. *Trends in Biochemical Sciences* **27**, 148-153 (2002).
- 41 Balk, J., Pierik, A. J., Netz, D. J., Muhlenhoff, U. & Lill, R. The hydrogenase-like Nar1p is essential for maturation of cytosolic and nuclear iron-sulphur proteins. *Embo J* **23**, 2105-2115 (2004).
- 42 Urzica, E., Pierik, A. J., Muhlenhoff, U. & Lill, R. Crucial role of conserved cysteine residues in the assembly of two iron-sulfur clusters on the CIA protein Nar1. *Biochemistry* **48**, 4946-4958 (2009).
- 43 Zhang, Y. *et al.* Dre2, a conserved eukaryotic Fe/S cluster protein, functions in cytosolic Fe/S protein biogenesis. *Mol Cell Biol* **28**, 5569-5582 (2008).
- 44 Netz, D. J. *et al.* The conserved protein Dre2 uses essential [2Fe-2S] and [4Fe-4S] clusters for its function in cytosolic iron-sulfur protein assembly. *Biochem J* **473**, 2073-2085 (2016).
- 45 Soler, N. *et al.* A S-adenosylmethionine methyltransferase-like domain within the essential, Fe-S-containing yeast protein Dre2. *Febs J* **279**, 2108-2119 (2012).
- 46 Murataliev, M. B., Feyereisen, R. & Walker, F. A. Electron transfer by diflavin reductases. *Biochim Biophys Acta* **1698**, 1-26 (2004).
- 47 Porter, T. D. & Kasper, C. B. Coding nucleotide sequence of rat NADPH-cytochrome P-450 oxidoreductase cDNA and identification of flavin-binding domains. *Proceedings of the National Academy of Sciences of the United States of America* **82**, 973-977 (1985).
- 48 Sharma, A. K., Pallesen, L. J., Spang, R. J. & Walden, W. E. Cytosolic iron-sulfur cluster assembly (CIA) system: factors, mechanism, and relevance to cellular iron regulation. *J Biol Chem* **285**, 26745-26751 (2010).
- 49 Hoffmann, B. *et al.* The multidomain thioredoxin-monothiol glutaredoxins represent a distinct functional group. *Antioxid Redox Signal* **15**, 19-30 (2011).
- 50 Goldberg, A. V. *et al.* Localization and functionality of microsporidian iron-sulphur cluster assembly proteins. *Nature* **452**, 624-628 (2008).
- 51 Zdobnov, E. M. & Apweiler, R. InterProScan--an integration platform for the signature-recognition methods in InterPro. *Bioinformatics* **17**, 847-848 (2001).
